# Supplementary material for: Protocol for a multicentre, parallel, randomised, controlled trial on the effect of sweeteners and sweetness enhancers on health, obesity and safety in overweight adults and children: the SWEET project
Source: PubMed Central journal article supplement — BMJ Open. 2022 Oct 12;12(10):e061075. doi: 10.1136/bmjopen-2022-061075 (PMC9562305; doi:10.1136/bmjopen-2022-061075), 2022-10-12
Supplement: bmjopen-2022-061075.draft_revisions.pdf [file bmjopen-2022-061075.draft_revisions.pdf]

# BMJ Open

BMJ Open is committed to open peer review. As part of this commitment we make the peer review history of every article we publish publicly available.

When an article is published we post the peer reviewers' comments and the authors' responses online. We also post the versions of the paper that were used during peer review. These are the versions that the peer review comments apply to.

The versions of the paper that follow are the versions that were submitted during the peer review process. They are not the versions of record or the final published versions. They should not be cited or distributed as the published version of this manuscript.

BMJ Open is an open access journal and the full, final, typeset and author-corrected version of record of the manuscript is available on our site with no access controls, subscription charges or pay-per-view fees (<http://bmjopen.bmj.com>).

If you have any questions on BMJ Open's open peer review process please email [info.bmjopen@bmj.com](mailto:info.bmjopen@bmj.com)

# BMJ Open

**Protocol for a multicentre, parallel, randomised, controlled, trial on the effect of sweeteners and sweetness enhancers on health, obesity and safety in overweight adults and children. The SWEET project.**

|                               |                                                                                                                                                                                                                                                                                                                                                                                                                                                                                                                                                                                                                                                                                                                                                                                                                                                                                                                                                                                                                                                                                                                                                                                                                                                                                                                                                                                                                                                                                                                                                                                                                                                                                                                                           |
|-------------------------------|-------------------------------------------------------------------------------------------------------------------------------------------------------------------------------------------------------------------------------------------------------------------------------------------------------------------------------------------------------------------------------------------------------------------------------------------------------------------------------------------------------------------------------------------------------------------------------------------------------------------------------------------------------------------------------------------------------------------------------------------------------------------------------------------------------------------------------------------------------------------------------------------------------------------------------------------------------------------------------------------------------------------------------------------------------------------------------------------------------------------------------------------------------------------------------------------------------------------------------------------------------------------------------------------------------------------------------------------------------------------------------------------------------------------------------------------------------------------------------------------------------------------------------------------------------------------------------------------------------------------------------------------------------------------------------------------------------------------------------------------|
| Journal:                      | <i>BMJ Open</i>                                                                                                                                                                                                                                                                                                                                                                                                                                                                                                                                                                                                                                                                                                                                                                                                                                                                                                                                                                                                                                                                                                                                                                                                                                                                                                                                                                                                                                                                                                                                                                                                                                                                                                                           |
| Manuscript ID                 | bmjopen-2022-061075                                                                                                                                                                                                                                                                                                                                                                                                                                                                                                                                                                                                                                                                                                                                                                                                                                                                                                                                                                                                                                                                                                                                                                                                                                                                                                                                                                                                                                                                                                                                                                                                                                                                                                                       |
| Article Type:                 | Protocol                                                                                                                                                                                                                                                                                                                                                                                                                                                                                                                                                                                                                                                                                                                                                                                                                                                                                                                                                                                                                                                                                                                                                                                                                                                                                                                                                                                                                                                                                                                                                                                                                                                                                                                                  |
| Date Submitted by the Author: | 17-Jan-2022                                                                                                                                                                                                                                                                                                                                                                                                                                                                                                                                                                                                                                                                                                                                                                                                                                                                                                                                                                                                                                                                                                                                                                                                                                                                                                                                                                                                                                                                                                                                                                                                                                                                                                                               |
| Complete List of Authors:     | <p>Kjølbaek, Louise; University of Copenhagen, Department of Nutrition, Exercise and Sports<br/> Manios, Yannis; Harokopio University of Athens, Department of Nutrition and Dietetics; Hellenic Mediterranean University Research Centre, Institute of Agri-food and Life Sciences<br/> Blaak, Ellen; Maastricht University, Department of Human Biology<br/> Martínez, Jose; University of Navarra, Center for Nutrition Research; IMDEA Food Institute<br/> Feskens, Edith; Wageningen University, Division of Human Nutrition and Health<br/> Finlayson, G; University of Leeds, School of Psychology<br/> Andersen, Sabina ; University of Copenhagen, Department of Nutrition, Exercise and Sports<br/> Reppas, Kyriakos; Harokopio University of Athens, Department of Nutrition and Dietetics<br/> Navas-Carretero, Santiago; University of Navarra, Center for Nutrition Research; Instituto de Salud Carlos III, CIBER Fisiopatología Obesidad y Nutrición (CIBERobn)<br/> Adam, Tanja; Maastricht University, Department of Nutrition &amp; Movement Sciences<br/> Hodgkins, Charo ; University of Surrey, Food, Consumer Behaviour and Health Research Centre<br/> del Álamo, Marta; European Clinical Research Infrastructure Network<br/> Lam, Tony; NetUnion sarl<br/> Moshoyiannis, Hariklia; Bioiatriki S.A., International Reference Laboratory Services<br/> Halford, Jason; University of Leeds, School of Psychology; University of Liverpool, Department of Psychology<br/> Harrold, Joanne; University of Liverpool, Department of Psychology<br/> Raben, Anne; University of Copenhagen, Nutrition, Exercise and Sports; Copenhagen University Hospital - Steno Diabetes Center Copenhagen, Clinical Research</p> |
| Keywords:                     | Nutrition < TROPICAL MEDICINE, DIABETES & ENDOCRINOLOGY, Microbiology < NATURAL SCIENCE DISCIPLINES                                                                                                                                                                                                                                                                                                                                                                                                                                                                                                                                                                                                                                                                                                                                                                                                                                                                                                                                                                                                                                                                                                                                                                                                                                                                                                                                                                                                                                                                                                                                                                                                                                       |
|                               |                                                                                                                                                                                                                                                                                                                                                                                                                                                                                                                                                                                                                                                                                                                                                                                                                                                                                                                                                                                                                                                                                                                                                                                                                                                                                                                                                                                                                                                                                                                                                                                                                                                                                                                                           |

1  
2  
3  
4  
5  
6  
7  
8  
9  
10  
11  
12  
13  
14  
15  
16  
17  
18  
19  
20  
21  
22  
23  
24  
25  
26  
27  
28  
29  
30  
31  
32  
33  
34  
35  
36  
37  
38  
39  
40  
41  
42  
43  
44  
45  
46  
47  
48  
49  
50  
51  
52  
53  
54  
55  
56  
57  
58  
59  
60

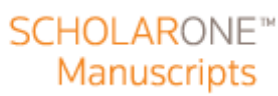

1  
2  
3  
4  
5  
6  
7  
8  
9  
10  
11  
12  
13  
14  
15  
16  
17  
18  
19  
20  
21  
22  
23  
24  
25  
26  
27  
28  
29  
30  
31  
32  
33  
34  
35  
36  
37  
38  
39  
40  
41  
42  
43  
44  
45  
46  
47  
48  
49  
50  
51  
52  
53  
54  
55  
56  
57  
58  
59  
60

# Protocol for a multicentre, parallel, randomised, controlled, trial on the effect of sweeteners and sweetness enhancers on health, obesity and safety in overweight adults and children. The SWEET project.

Authors: Louise Kjølbæk<sup>1</sup>, Yannis Manios<sup>2,3</sup>, Ellen E Blaak<sup>4</sup>, J Alfredo Martinez<sup>5,6,7</sup>, Edith J M Feskens<sup>8</sup>, Graham Finlayson<sup>9</sup>, Sabina Stoffer Hjorth Andersen<sup>1</sup>, Kyriakos Reppas<sup>2</sup>, Santiago Navas-Carretero<sup>5,7,10</sup>, Tanja C Adams<sup>11</sup>, Charo E Hodgkins<sup>12</sup>, Marta del Álamo<sup>13</sup>, Tony Lam<sup>14</sup>, Hariklia Moshoyiannis<sup>15</sup>, Jason C G Halford<sup>9,16</sup>, Joanne Harrold<sup>16</sup>, Anne Raben<sup>1,17</sup>

<sup>1</sup>Department of Nutrition, Exercise and Sports, University of Copenhagen, Frederiksberg C, Denmark, <sup>2</sup>Department of Nutrition and Dietetics, Harokopio University of Athens, Kallithea Athens, Greece, <sup>3</sup>Institute of Agri-food and Life Sciences, Hellenic Mediterranean University Research Centre, Heraklion, Greece, <sup>4</sup>Department of Human Biology, Maastricht University, Maastricht, Netherlands, <sup>5</sup>Center for Nutrition Research, University of Navarra, Pamplona, Spain, <sup>6</sup>IMDEA Food Institute, Madrid, Spain, <sup>7</sup>Centro de investigación Biomédica en Red, fisiopatología de la obesidad y Nutrición, Instituto de Salud Carlos III, Madrid, Spain, <sup>8</sup>Division of Human Nutrition and Health, Wageningen University, Wageningen, Netherlands, <sup>9</sup>School of Psychology, University of Leeds, Leeds, United Kingdom, <sup>10</sup>Navarra Institute for Health Research, Pamplona, Spain, <sup>11</sup>Department of Nutrition & Movement Sciences, Maastricht University, Maastricht, Netherlands, <sup>12</sup>Food, Consumer Behaviour and Health Research Centre, School of Psychology, University of Surrey, Guildford, United Kingdom, <sup>13</sup>European Clinical Research Infrastructure Network, Paris, France, <sup>14</sup>NetUnion sarl, Lausanne, Switzerland, <sup>15</sup>International Reference Laboratory Services, Bioiatriki S.A., Athens, Greece, <sup>16</sup>Department of Psychology, The University of Liverpool, Liverpool, United Kingdom, <sup>17</sup>Clinical Research, Copenhagen University Hospital - Steno Diabetes Center Copenhagen, Herlev, Denmark.

1 Corresponding author: Louise Kjølbæk, Rolighedsvej 26, 1958 Frederiksberg C, Denmark, +45  
2  
3 3533 1462, FAX NO: +45 3532 1600, [louisekjoelbaek@nexs.ku.dk](mailto:louisekjoelbaek@nexs.ku.dk)  
4

5  
6 Word count: 4000  
7

8  
9  
10 Keywords: sugar, body weight, gut microbiota, weight loss, weight maintenance, weight loss  
11  
12 maintenance, obesity, anthropometry, type 2 diabetes, cardiovascular diseases, allergenicity.  
13  
14  
15  
16  
17  
18  
19  
20  
21  
22  
23  
24  
25  
26  
27  
28  
29  
30  
31  
32  
33  
34  
35  
36  
37  
38  
39  
40  
41  
42  
43  
44  
45  
46  
47  
48  
49  
50  
51  
52  
53  
54  
55  
56  
57  
58  
59  
60

## ABSTRACT

### Introduction

The aim of this randomised controlled trial (RCT) is to investigate if prolonged consumption of sweeteners and sweetness enhancers (S&SEs) within a healthy diet will improve weight loss maintenance and obesity related risk factors, and affect safety markers compared to sugar.

### Methods and analysis

SWEET (Sweeteners and sweetness enhancers: Prolonged effects on health, obesity and safety) is a 1-year multicentre RCT including at least 330 adults with overweight (18-65 years, body mass index (BMI) $>25$  kg/m<sup>2</sup>) and 40 children (6-12 years, BMI-for-age $>85^{\text{th}}$  percentile). In an initial 2-month period, adults will consume a low-energy diet with the aim to achieve  $\geq 5\%$  weight loss. Children are advised to consume a general healthy diet to maintain body weight, thus reducing their BMI-for-age z-score. In the following 10 months, participants will be randomised to follow a healthy *ad libitum* diet with or without S&SE products. Clinical investigations are scheduled at baseline, after 2, 6 and 12 months. The primary outcomes are body weight for efficacy and gut microbiota composition (in relation to metabolic health) for safety, both in adults. Secondary outcomes include anthropometry, risk markers for type-2-diabetes and cardiovascular diseases, questionnaires including e.g. food preferences, craving and appetite, and tests for allergenicity.

### Ethics and dissemination

The trial protocol has been approved by the following national ethical committees; The research ethics committees of the capital region (Denmark), approval code: H-19040679, The medical ethics committee of the University Hospital Maastricht and Maastricht University (Netherlands), approval code: NL70977.068.19 / METC19-056s, Research Ethics Committee of the University of Navarra (Spain), approval code: 2019.146 mod1, Research Ethics Committee of Harokopio University (Greece), approval code: 1810/18-06-2019. The trial will be conducted in accordance

1 with the Declaration of Helsinki. Results will be published in international peer-reviewed  
2  
3 scientific journals regardless of whether the findings are positive, negative or inconclusive.  
4  
5

6 **Trial registration number:** NCT04226911.  
7  
8  
9

### 10 **Strengths and limitations of this trial**

11

- 12 • The trial is apparently the first of its kind to investigate long-term effects of S&SEs in the  
13 contexts of an *ad libitum* healthy diet including both foods and drinks, compared to sugar.  
14
- 15 • It is also the first to include a 2-month weight loss period to determine the effects of S&SE  
16 foods and drinks on longer-term weight maintenance after weight loss, compared to sugar.  
17
- 18 • A broad range of measurements related to health and safety (e.g. gut microbiota,  
19 allergenicity, specific adverse events), appetite and food preferences are included to address  
20 concerns raised in relation to S&SEs.  
21
- 22 • This multicentre trial covers Northern, Central and Southern Europe, thereby reflecting  
23 different geographic distributions of adult and childhood obesity in Europe.  
24
- 25 • The number of included children was reduced through the recruitment period, but this will  
26 not affect the two primary outcomes (body weight and gut microbiota composition) as  
27 sample size determination was done exclusively for adults.  
28  
29  
30  
31  
32  
33  
34  
35  
36  
37  
38  
39  
40  
41  
42  
43  
44  
45  
46  
47  
48  
49  
50  
51  
52  
53  
54  
55  
56  
57  
58  
59  
60

## INTRODUCTION

Obesity is a major global health problem giving rise to increased risk of non-communicable diseases such as type-2-diabetes (T2D) and cardiovascular diseases (CVD).[1] Sustaining energy balance is critical to maintain body weight. However, sugar contributes to the energy density of diets, and may promote a positive energy balance.[2] In 2015, the World Health Organization (WHO) strongly recommended that free sugar intake should constitute <10 energy percentage (E%) and preferably <5 E% as a conditional recommendation.[2] The latter is still not fulfilled by large parts of the population, including Denmark,[3,4] Greece,[5] Spain[6] and Netherlands.[7]

One often-recommended approach to reduce sugar intake is to replace sugar with sweeteners or sweetness enhancers (S&SEs). The use of S&SEs allows products to retain their palatability without the associated calories, creating a perception of a 'healthier' product.[8] Although drinks often constitute the largest part of S&SEs products consumed, S&SEs products also include foods. In the US and worldwide, the consumption of S&SEs products such as desserts, gums and breakfast foods has increased.[9] However, foods with S&SEs have been less extensively investigated. S&SEs comprise a variety of compounds with proposed mechanisms on health parameters,[10] however evidence is conflicting. For example, S&SEs have been claimed to result in detrimental effects on appetite, body weight, glucose metabolism, and gut microbiota.[8] In contrast, several systematic reviews and meta-analysis found no detrimental effects on appetite and body weight – rather on the contrary[11–13] and interestingly, a large 1-year study found S&SEs to be superior to water for weight loss and weight maintenance.[14] Not all reviews have come to the same conclusion, but selective citation of the different studies could be the cause.[15] In relation to postprandial glycemia and insulinemia no differences were observed between S&SEs and controls in recent systematic reviews and meta-analysis.[16,17] An aberrant gut microbiota composition and a change in composition after 7 days consumption of saccharin have been associated with impaired glucose homeostasis.[18] However, that study included only 7 human participants, conclusions were based on a post-hoc division of responders and non-responders, and there was no control group.[18]



## Aim and objectives

The overall aim of the randomised controlled trial (RCT) SWEET (Sweeteners and sweetness enhancers: Prolonged effects on health, obesity and safety) is to investigate the efficacy and safety of combined (foods and drinks) and prolonged use of S&SEs - as part of a whole healthy *ad libitum* diet approach - in a population of overweight adults and children. The two primary outcomes on efficacy and safety will be assessed in adults by 1-year changes in body weight and 1-year changes in gut microbiota (in relation to metabolic health outcomes), respectively.

Secondary objectives concern the effects on obesity-related risk factors such as fat mass, glucose metabolism, and lipidemia, as well as safety aspects such as allergenicity. Other outcomes include appetite sensations, food cravings and preferences and preference for sweet taste.

## Hypothesis

We hypothesize that prolonged use of S&SEs in foods and drinks will result in improved body weight control due to increased palatability of the diet and thereby compliance to the recommendations for a healthy diet, compared to sugar. Further, we hypothesize that there will be no safety concerns using S&SEs in the long-term.

## METHODS AND ANALYSIS

### Study design

SWEET is conducted in four intervention sites; Athens, (Harokopio University of Athens, Greece), Copenhagen, (University of Copenhagen, Denmark), Maastricht, (Maastricht University, Netherlands), and Navarra (University of Navarra, Spain) covering North, Central, South and East Europe thereby reflecting different geographic distributions of obesity in Europe. In the 1-year trial both adults and families (at least 1 adult and 1 child) are included. The trial consists of an initial 2-month period followed by a 10-month randomised 2-armed parallel intervention period. For adults, the goals in these periods are first to achieve a weight loss (WL) and second to maintenance the WL. For children, the goals are first to achieve weight stability and second to maintain BMI-for-age z-score. The 10-month randomised intervention period will

1 be carried out by using a “fading visit” approach (Figure 1). During the trial, all participants will  
2  
3 undergo 4 clinical investigation days (CIDs) and will be supervised by dieticians  
4  
5 individually/familywise and/or in groups at least every 3<sup>rd</sup> month.  
6  
7

8 Originally, a 1-year follow up period was planned after the 10-month intervention period;  
9  
10 however, it was omitted due to recruitment delay caused by the Covid-19 pandemic.  
11  
12 Furthermore, the initial plan was to include at least one child per adult (i.e. only families).  
13  
14 However, recruitment turned out to be very difficult and the strategy was changed to also include  
15  
16 adults without children, because the primary outcomes and sample size determinations were  
17  
18 based solely on adults. Screening visits were conducted between 29-Jun-2020 and 27-Sep-2021,  
19  
20 and the last patient last visit (CID at month 12) is scheduled for 30-Sep-2022.  
21  
22  
23

## 24 Patient and public involvement

25  
26 Neither patients nor the public were involved in the design and conduct of the study and they  
27  
28 will not be involved in interpretation, reporting, or dissemination of the trial.  
29  
30  
31

## 32 Participants

### 33 Recruitment and screening

34  
35 Participants were recruited continuously by multiple routes e.g. web-pages, social medias,  
36  
37 newspapers, and registries (local databases or civil registration numbers). Potential adult  
38  
39 participants were pre-screened by phone and answered questions on behalf of their child(ren). If  
40  
41 still eligible and interested after pre-screening, they received written information and were  
42  
43 invited to an information meeting. After the information meeting, an informed consent form and  
44  
45 a general data protection regulation form were signed by the adult participant, and for children  
46  
47 by the parents, or person(s) having custody and the site-PI or delegated staff. Thereafter, the  
48  
49 screening visit was scheduled. Participants were screened in the fasting state where all in- and  
50  
51 exclusion criteria were assessed. The recruitment has ended with inclusion of 341 adults and 38  
52  
53 children.  
54  
55  
56  
57  
58  
59  
60

### Eligibility criteria

Adults (men and women), 18-65 years, BMI $\geq$ 25 kg/m<sup>2</sup> and children (boys and girls), 6-12 years, and BMI-for-age $>$ 85<sup>th</sup> percentile were included. Children were only included if they had an eligible adult family member (i.e. as a family) - a biological relationship was not required. However, it was required that the family lived in the same household at least 4 days/week. Participants were required to have a regular consumption of sugar-containing/sugar-sweetened products and be motivated and willing to be randomised to any of the two intervention groups. All exclusion criteria are listed in Table 1. In- and exclusion criteria are assessed at screening, however the site-PI or delegated personnel has the right to terminate participation at any time if deemed in the participant's best interest, and children are excluded if their adult family member's participation is discontinued.

**Table 1: List of exclusion criteria**

| Adults                                                                                                                                                         | Children                                                                                      |
|----------------------------------------------------------------------------------------------------------------------------------------------------------------|-----------------------------------------------------------------------------------------------|
| <i>General</i>                                                                                                                                                 |                                                                                               |
| Weight change $>$ 5% 2 months prior to screening                                                                                                               | Intensive physical training ( $>$ 10 hours of per week)                                       |
| Surgical treatment of obesity                                                                                                                                  | Self-reported eating disorders                                                                |
| Blood donation $<$ 3 months prior to study initiation                                                                                                          | Intolerance and allergies expected to interfere with the study                                |
| Change in smoking habits during the last month. (Smoking was allowed and monitored throughout the study)                                                       | Insufficient communication with national language                                             |
| Regularly drinking $>$ 21 (men) or $>$ 14 (women) units of alcohol per week                                                                                    | Inability, physically or mental, to comply with the procedures required by the study protocol |
| Intensive physical training ( $>$ 10 hours of per week)                                                                                                        | Participant's general condition contraindicates continuing the study                          |
| Self-reported eating disorders                                                                                                                                 | Simultaneous participation in other clinical intervention studies                             |
| Intolerance and allergies expected to interfere with the study                                                                                                 |                                                                                               |
| Self-reported drug abuse within the previous 12 months                                                                                                         |                                                                                               |
| Night- or shift work that ends later than 11 PM                                                                                                                |                                                                                               |
| For women: Pregnancy, lactation                                                                                                                                |                                                                                               |
| Persons who do not have access to either (mobile) phone or Internet                                                                                            |                                                                                               |
| Insufficient communication with national language                                                                                                              |                                                                                               |
| Inability, physically or mental, to comply with the procedures required by the study protocol                                                                  |                                                                                               |
| Participant's general condition contraindicates continuing the study                                                                                           |                                                                                               |
| Simultaneous participation in other clinical intervention studies                                                                                              |                                                                                               |
| <i>Medical conditions</i>                                                                                                                                      |                                                                                               |
| Diagnosed diabetes mellitus                                                                                                                                    | Diagnosed diabetes mellitus                                                                   |
| Medical history of CVD (e.g. current angina; myocardial infarction or stroke within the past 6 months; heart failure; symptomatic peripheral vascular disease) | Other diseases that may influence the study outcomes                                          |
| Systolic blood pressure above 160 mmHg and/or diastolic blood pressure above 100 mmHg (measured at screening) whether on or off treatment for hypertension     |                                                                                               |
| Significant liver diseases e.g. cirrhosis (fatty liver disease allowed)                                                                                        |                                                                                               |
| Malignancy which was active or in remission for less than five years after last treatment (local basal and squamous cell skin cancer allowed)                  |                                                                                               |
| Active inflammatory bowel disease, celiac disease, chronic pancreatitis or other disorder potentially causing malabsorption                                    |                                                                                               |
| Thyroid diseases, except Levothyroxine treatment of hypothyroidism if not on a stable dose for at least 3 months                                               |                                                                                               |

| Adults                                                                                                                                                                                                                                                                                                                                                                                                                                                                                                                                                                                | Children                                                                                                                                                            |
|---------------------------------------------------------------------------------------------------------------------------------------------------------------------------------------------------------------------------------------------------------------------------------------------------------------------------------------------------------------------------------------------------------------------------------------------------------------------------------------------------------------------------------------------------------------------------------------|---------------------------------------------------------------------------------------------------------------------------------------------------------------------|
| Psychiatric illness (e.g. major depression, bipolar disorders)                                                                                                                                                                                                                                                                                                                                                                                                                                                                                                                        |                                                                                                                                                                     |
| <i>Medication</i>                                                                                                                                                                                                                                                                                                                                                                                                                                                                                                                                                                     |                                                                                                                                                                     |
| Use currently or within the previous 3 months of prescription or over the counter medication that had the potential of affecting body weight incl. food supplements<br>Exceptions related to medical conditions:<br>I) Cholesterol or blood pressure lowering medication were allowed if the participant's dose had not changed during the last 3 months<br>II) low dose antidepressants if they, in the judgement of the investigator, did not affect weight or study participation.<br>III) Levothyroxine for treatment of hypothyroidism if on a stable dose for at least 3 months | Use currently or within the previous 3 months of prescription or over the counter medication that had the potential of affecting body weight incl. food supplements |
| <i>Laboratory screening<sup>1</sup></i>                                                                                                                                                                                                                                                                                                                                                                                                                                                                                                                                               |                                                                                                                                                                     |
| Glucose >7.0 mmol/L                                                                                                                                                                                                                                                                                                                                                                                                                                                                                                                                                                   | -                                                                                                                                                                   |
| Haemoglobin:                                                                                                                                                                                                                                                                                                                                                                                                                                                                                                                                                                          |                                                                                                                                                                     |
| women; <7.5 mmol/L (Copenhagen, Maastricht, Navarra, Athens)                                                                                                                                                                                                                                                                                                                                                                                                                                                                                                                          |                                                                                                                                                                     |
| men; <8.5 mmol/L (Copenhagen, Maastricht) and <8.1 mmol/L (Navarra, Athens)                                                                                                                                                                                                                                                                                                                                                                                                                                                                                                           |                                                                                                                                                                     |
| For Maastricht participants only:                                                                                                                                                                                                                                                                                                                                                                                                                                                                                                                                                     |                                                                                                                                                                     |
| Creatinine <50 µmol/L and >100 µmol/L                                                                                                                                                                                                                                                                                                                                                                                                                                                                                                                                                 |                                                                                                                                                                     |
| ALT >34 IU                                                                                                                                                                                                                                                                                                                                                                                                                                                                                                                                                                            |                                                                                                                                                                     |

<sup>1</sup>Fasting blood sample was collected from adults and locally analysed to assess glucose and haemoglobin levels, and some additional values at Maastricht.

ALT, Alanine transaminase; CVD, cardiovascular diseases; IU, international unit

## Randomisation

After screening, eligible participants were randomly assigned to one of the two intervention groups in a 1:1 ratio by a site-specific randomisation list created by a person in Copenhagen not involved in the trial. The randomisation was stratified by gender, age (<40 years or ≥40 years) and BMI (<30 or ≥30 kg/m<sup>2</sup>), and stratification was implemented by sequentially assigning families and adults from each stratum to the two interventions in blocks of 4, using the software R. Each household was randomised to the same intervention determined by the oldest member of the household. Although randomisation was done after screening, it is not revealed to the household/participant before completion of the initial 2-month period.

## Intervention

This 1-year trial is divided into two periods of 2- and 10-months duration (Figure 1) with the second period being the randomised intervention period.

### Two-month period

In the initial 2-month period, adults - regardless of randomisation - receive a low-energy diet (LED) (Cambridge Weight Plan, Northants, United Kingdom). If the WL criteria of ≥5% is not

1 achieved, the participant will be excluded. During the 2-month period, adults visit the  
2  
3 intervention site 2-3 times for collection of LED products, weighing and dietetic counselling.  
4  
5 The LED consists of 3,347-4,184 kJ/d, 15-20 E% fat, 35-40 E% protein and 45-50 E%  
6  
7 carbohydrate. Four products per day will be provided as shakes, soups, ready-to-drink products  
8  
9 and bars. Additionally, 200 g tomatoes, 125 g cucumber, 50 g lettuce and chewing of maximum  
10  
11 6 pieces of sugar-free chewing gum or pastilles per day are allowed. For some adults (e.g. BMI  
12  
13  $>40 \text{ kg/m}^2$  or achieving a BMI  $\leq 23 \text{ kg/m}^2$  during the LED without a wish to lose more weight),  
14  
15 the LED may be supplemented with milk/yoghurt, but only if it is expected that the required 5%  
16  
17 WL can be achieved.  
18  
19  
20  
21

22 In the initial 2-month period, children are encouraged to follow the dietary recommendations  
23  
24 of the American Academy of Paediatrics on the prevention, assessment and treatment of  
25  
26 overweight and obesity.[19] The goal is to obtain weight stability, which will reduce BMI-for-  
27  
28 age z-score. Children are welcome to visit the intervention site for weighing and dietician  
29  
30 counselling, however it is not mandatory.  
31  
32

### 33 Ten-month period with S&SEs and sugar diets

34 During the 10-month randomised intervention period, dietary counselling sessions will be  
35  
36 practiced as individual (i.e. household) counselling sessions at months 2 and 6 and when Covid-  
37  
38 19 restrictions allow in intervention groups (months 4 and 9). Otherwise, individual counselling  
39  
40 sessions will be scheduled. The goals are to maintain WL for adults and BMI-for-age z-score for  
41  
42 children. Further reduction in weight or BMI-for-age z-score is allowed, if the participant is  
43  
44 compliant with the intervention, but counselling sessions will only cover maintenance aspects.  
45  
46  
47  
48  
49

50 The two intervention diets are I) a healthy diet with  $<10 \text{ E\%}$  sugar allowing foods and drinks  
51  
52 with S&SEs (S&SEs group) and II) a healthy diet with  $<10 \text{ E\%}$  sugar not allowing foods and  
53  
54 drinks with S&SEs (Sugar group). Both diets are *ad libitum*. To secure dietary adherence  
55  
56 calculation of maximum sugar intake (g) will be based on a diet with 9.5 E% sugar. The  
57  
58 maximum allowed sugar intake will be calculated individually based on body weight at month 2  
59  
60 (re-calculated at month 6), using the formula by Henry [20] multiplied by the physical activity

level (PAL). A unit system for the sugar and S&SEs intake has been developed, where individual maximum sugar intake is converted to a certain number of units per day (and week) (1 unit corresponding to 10 g sugar). One unit of S&SE product in the S&SE group is equal to the amount - in weight or volume - of one unit sugar-rich product in the Sugar group. For the S&SE group, as many sugar-containing products as possible should be replaced by S&SE products. Food exchange lists, covering categories listed in Table 2 including pictures of products, amounts and units per product, guide the participants in the two groups. Additional details and examples of the two interventions are provided in Table 3. Due to the characteristics of the study, blinding is not possible, however all effort to blind study staff taking measurements and persons doing statistical analysis will be done.

**Table 2: Foods and drinks relevant for the 10-month randomized intervention period**

| Category                   | Examples                                                                                                                                                                                     |
|----------------------------|----------------------------------------------------------------------------------------------------------------------------------------------------------------------------------------------|
| Drinks                     | Carbonated soft drinks, fruit juice, non-carbonated soft drinks, cocoa powder, mixture of fruit syrup and water, energy drinks, pre-packed juices and nectars, protein shakes, energy drinks |
| Milk products              | Flavoured yoghurts, yoghurt drinks, milk shakes, chocolate milk, fermented milk, cold butter milk                                                                                            |
| Breakfast cereals          | Breakfast cereals, muesli, cereals bars, rolled oats                                                                                                                                         |
| Sugar, honey and marmalade | Sugar, syrup, honey, marmalade, jam, compote                                                                                                                                                 |
| Chocolate and bars         | Chocolate with and without filling, chocolate bars, chocolate/hazelnut paste/spread, thin sliced chocolate                                                                                   |
| Desserts                   | Pudding, mousse, cold soufflé, custard, strained stewed fruit, Greek jelly, pancakes                                                                                                         |
| Ice cream                  | Ice cream, sorbet, ice lolly                                                                                                                                                                 |
| Candy                      | Wine gum, liquorice, Bon-bon mix, marshmallow, marzipan                                                                                                                                      |
| Cake and biscuits          | Cake, cookies, biscuits, Danish pastry, sponge cake                                                                                                                                          |

**Table 3: Description of diets in the 10-month randomized intervention period**

|                           | Sugar group                                                                                                                | S&SE group                                                                                                                                                                                                                                                                                                                                                                                                                                                   |
|---------------------------|----------------------------------------------------------------------------------------------------------------------------|--------------------------------------------------------------------------------------------------------------------------------------------------------------------------------------------------------------------------------------------------------------------------------------------------------------------------------------------------------------------------------------------------------------------------------------------------------------|
| Sugar-containing products | <10 E% added sugar.                                                                                                        | <10 E% added sugar and as little as possible.                                                                                                                                                                                                                                                                                                                                                                                                                |
| S&SE products             | Not allowed. Except for up to 2 pieces of sugar-free chewing gum per day.                                                  | Allowed. And without any restrictions on specific types of S&SEs.                                                                                                                                                                                                                                                                                                                                                                                            |
| Units                     | Consumption of a maximum number of units (corresponding to 9.5 E% added sugar) of sugar-containing products each day/week. | Unit calculation (corresponding to 9.5 E% added sugar in weight/volume) will guide the participant to ensure intake of <10 E% added sugar. As many sugar-containing products in the diet as possible should be replaced with S&SE-containing products. Ideally, the amount of S&SEs products corresponding to the maximal units from sugar-containing products should be consumed. However, if a participant experiences AE, they are recommended to consume |

|         | <b>Sugar group</b>                                                                                                                                                                                                                       | <b>S&amp;SE group</b>                                                                                                                                                                                                                                                                                                                                                                                              |
|---------|------------------------------------------------------------------------------------------------------------------------------------------------------------------------------------------------------------------------------------------|--------------------------------------------------------------------------------------------------------------------------------------------------------------------------------------------------------------------------------------------------------------------------------------------------------------------------------------------------------------------------------------------------------------------|
| Example | For a participant with an energy requirement of 9,000 kJ/d, 9.5 E% from sugar corresponds to 50 gram added sugar = 5 units. 5 units per day or 35 units per week is then the maximum allowed intake of added sugar for this participant. | less than the calculated units and change to other S&SE products (e.g. avoid sugar-alcohols).<br>For a participant with an energy requirement of 9,000 kJ/d, 9.5 E% from sugar corresponds to 50 gram added sugar = 5 units. Ideally, this participant should consume 5 units per day or 35 units per week of S&SE containing products. One unit is equivalent to 1 unit in the sugar group (in weight or volume). |

E%, energy percentage; S&SEs, sweeteners and sweetness enhancers

### *Compliance:*

Participants are required to record intake of all foods and drinks (pen and paper) for 4 days (3 weekdays and 1 weekend day) at months 0 and 12 with information on time, type/brand names, cooking and processing methods, weight or household measures. Daily average intake of energy, macro- and micro-nutrients will be calculated by national nutritional software in the 4 intervention sites. Furthermore, intake of sugar and S&SEs in units is assessed. Additionally, adults complete a food frequency questionnaire about sweet products (sFFQ), and from a 24-hour urine collection, biomarkers of S&SEs will be analysed by Wageningen University, Netherlands, and excretion of urea/nitrogen will be analysed locally.

### **Data collection and outcomes**

Including information meeting, screening, counselling sessions and CIDs, the trial consists of a minimum of 10 and 6 visits for adults and children, respectively. Data is collected according to standard operation procedures (SOPs) and Table 4 shows activities/data collection at each visit. Most data will be collected at months 0, 2, 6 and 12 where participants have fasted for a minimum of 10 hours, and avoided intensive physical exercise, coffee and smoking for 12 hours prior to the CIDs.



**Table 4: Flow chart for adults (A) and children (C) (full sampling at months 0 and 12)**

|                                                     | Pre-screening | Information meeting | Screening      | Baseline         | 2-month period (CID1-CID2) |                    |                  | 10-month randomised intervention period (CID2-CID4) |                  |                    | 1-year assessment |
|-----------------------------------------------------|---------------|---------------------|----------------|------------------|----------------------------|--------------------|------------------|-----------------------------------------------------|------------------|--------------------|-------------------|
| CID Visit Month                                     | -<br>-<br>-   | -<br>V0             | -<br>V1        | CID1<br>V2<br>0  | -<br>V3<br>0.5             | -<br>V4<br>1       | CID2<br>V5<br>2  | -<br>V6<br>4                                        | CID3<br>V7<br>6  | -<br>V8<br>9       | CID4<br>V9<br>12  |
| Inclusion/exclusion criteria                        | A+C           |                     | A+C            |                  |                            |                    |                  |                                                     |                  |                    |                   |
| Signing Informed Consent                            |               | A+C <sup>0</sup>    |                |                  |                            |                    |                  |                                                     |                  |                    |                   |
| Med. hist., medication etc.                         |               |                     | A+C            |                  |                            |                    |                  |                                                     |                  |                    |                   |
| Randomisation of the oldest family/household member |               |                     | A              |                  |                            |                    |                  |                                                     |                  |                    |                   |
| Supervision/counselling                             |               |                     |                | A+C <sup>1</sup> |                            | A(+C) <sup>2</sup> | A+C <sup>1</sup> | A(+C) <sup>2</sup>                                  | A+C <sup>1</sup> | A(+C) <sup>2</sup> | A+C <sup>1</sup>  |
| Collection of LED products                          |               |                     |                | A <sup>#</sup>   | A <sup>#</sup>             | A <sup>#</sup>     | A <sup>#</sup>   |                                                     |                  |                    |                   |
| Body weight and height <sup>4</sup>                 |               |                     | A+C            | A+C              | A <sup>3</sup>             | A <sup>3</sup>     | A+C              | A <sup>3</sup>                                      | A+C              | A <sup>3</sup>     | A+C               |
| Waist and hip circumference                         |               |                     |                | A+C              |                            |                    | A+C              |                                                     | A+C              |                    | A+C               |
| Body composition                                    |               |                     |                | A+C <sup>5</sup> |                            |                    | A                |                                                     |                  |                    | A+C <sup>5</sup>  |
| Blood pressure and heart rate                       |               |                     | A+C            | A+C              |                            |                    | A+C              |                                                     | A+C              |                    | A+C               |
| Fasting blood samples                               |               |                     | A <sup>6</sup> | A+C              |                            |                    | A+C <sup>7</sup> |                                                     | A+C              |                    | A+C               |
| Adverse events and concomitant medication           |               |                     |                | A+C              |                            |                    | A+C              |                                                     | A+C              |                    | A+C               |
| Allergenicity (skin prick test)                     |               |                     |                | A                |                            |                    |                  |                                                     |                  |                    | A                 |
| 24h urine collection (content of S&SEs)             |               |                     |                | A                |                            |                    |                  | A                                                   |                  |                    | A                 |
| Faecal spot sample                                  |               |                     |                | A                |                            |                    | A                |                                                     | A                |                    | A                 |
| 4-day dietary record                                |               |                     |                | A+C              |                            |                    |                  |                                                     |                  |                    | A+C               |
| <b>Questionnaires (electronic platforms):</b>       |               |                     |                |                  |                            |                    |                  |                                                     |                  |                    |                   |
| General background questionnaire                    |               |                     |                | A+C              |                            |                    |                  |                                                     |                  |                    |                   |
| Physical activity                                   |               |                     |                | A+C              |                            |                    |                  |                                                     |                  |                    | A+C               |
| Three factor eating questionnaire                   |               |                     |                | A+C              |                            |                    |                  |                                                     |                  |                    | A+C               |
| Leeds food preference questionnaire                 |               |                     |                | A+C              |                            |                    | A+C              |                                                     | A+C              |                    | A+C               |
| Allergenicity                                       |               |                     |                | A+C              |                            |                    |                  |                                                     |                  |                    | A+C               |
| Craving for sweet taste                             |               |                     |                | A                |                            |                    |                  |                                                     |                  |                    | A                 |
| Perception of S&SEs                                 |               |                     |                | A                |                            |                    |                  |                                                     | A <sup>8</sup>   |                    | A <sup>8</sup>    |
| Control of eating                                   |               |                     |                | A                |                            |                    | A                |                                                     | A                |                    | A                 |
| Subjective appetite sensations                      |               |                     |                | A                |                            |                    | A                |                                                     | A                |                    | A                 |
| Sweet food frequency questionnaire (FFQ)            |               |                     |                | A                |                            |                    |                  |                                                     |                  |                    | A                 |
| Diet satisfaction                                   |               |                     |                | A                |                            |                    |                  |                                                     | A                |                    | A                 |
| Perception and evaluation of the intervention       |               |                     |                |                  |                            |                    |                  |                                                     | A                |                    | A                 |
| Quality of life                                     |               |                     |                | A                |                            |                    |                  |                                                     |                  |                    | A                 |
| Puberty                                             |               |                     |                | C                |                            |                    |                  |                                                     | C                |                    | C                 |

<sup>#</sup>Adults will collect LED products from the intervention site every 2nd or 3rd week during the 2-month period. At months 0.5 and 1.5 (optional) the adults will be weighed and have the opportunity to consult a dietician.

<sup>0</sup>For children, the informed consent is signed by the parents/guardians.

<sup>1</sup>Individual/family counselling is preferably scheduled at the same day as the CID.

<sup>2</sup>Group counselling, children participation is preferred, but not mandatory.

<sup>3</sup>Fasting is not required for this body weight measurement.

<sup>4</sup>Height is only measured at screening for adults.

<sup>5</sup>At University of Maastricht, body composition is not measured in children.

<sup>6</sup>At screening, fasting blood samples will be analysed at each intervention site. All other blood samples are analysed at the Central Laboratory (Bioiatriki).

<sup>7</sup>At University of Maastricht, a fasting blood sample is not drawn from children.

<sup>8</sup>A shorter version of the questionnaire is used at CID3-4.

A: adult. C: child. CID: clinical investigation day. LED: low-energy diet. S&SEs: sweeteners and sweetness enhancers.



## Primary outcomes

This trial has two independent primary outcomes. The primary outcome for efficacy is 1-year change in body weight. The primary outcome for safety is 1-year change in gut microbiota composition associated with impaired health (e.g. change in microbial beta-diversity and composition). Both outcomes relate only to adults, and hence the required sample size was calculated for adults only.

### *Body weight*

Body weight is measured to the nearest 0.1 kg using a digital scale with the participant wearing underwear/light clothes. Fasting body weight will be measured at screening and CIDs, however fasting is not required, when body weight is measured at other visits.

### *Gut microbiota*

Gut microbiota composition will be assessed from faecal spot samples collected at home prior to all CIDs. Samples are immediately frozen (-20 °C) and later transported to the intervention site in cooling bags, whereafter they are stored at -80°C. Samples will be analysed targeting the V3-V4 regions of 16s rRNA genes by Illumina sequencing at Maastricht University, Netherlands.

## Secondary outcomes

Secondary outcomes include changes in anthropometry and body composition (for children, BMI-for-age z-score), risk factors for T2D and CVD, allergenicity, adverse events (AE), and concomitant medication. Additionally, some secondary outcomes will be assessed in adult sub-groups e.g. gut-brain signalling markers, postprandial energy expenditure and substrate oxidation, physical activity, liver fat, adipose tissue and lipid metabolism, brain reward, insulin sensitivity markers, composition and functionality of the human gut microbiota in vitro. Furthermore, children's gut microbiota composition may be analysed depending on the final sample size.

### *Anthropometry*

Height is measured to the nearest 0.5 cm using a stadiometer at screening and for children at all

1  
2  
3  
4  
5  
6  
7  
8  
9  
10  
11  
12  
13  
14  
15  
16  
17  
18  
19  
20  
21  
22  
23  
24  
25  
26  
27  
28  
29  
30  
31  
32  
33  
34  
35  
36  
37  
38  
39  
40  
41  
42  
43  
44  
45  
46  
47  
48  
49  
50  
51  
52  
53  
54  
55  
56  
57  
58  
59  
60

CIDs. For adults, BMI is calculated as body weight (kg) / height<sup>2</sup> (m<sup>2</sup>). For children, the WHO AnthroPlus software ([www.who.int/tools/growth-reference-data-for-5to19-years/application-tools](http://www.who.int/tools/growth-reference-data-for-5to19-years/application-tools)) is applied to calculate BMI-for-age percentile and z-score. Waist and hip circumferences are measured twice with a non-elastic tape measure on the skin to the nearest 0.5 cm, and the average is calculated. Waist circumference is measured halfway between the lowest rib and iliac crest during exhalation. Hip circumference is measured as the largest circumference in the area around the buttock. Dual-energy X-ray absorptiometry (DXA) scans are performed in underwear to assess body composition including fat percentage, fat mass and fat free mass.

### *Blood pressure and heart rate*

After minimum 5 minutes rest in a sitting position, blood pressure (mmHg) and heart rate (beats per minute) are measured three times on the right arm with an automatically inflated cuff. An average is calculated from the last two measurements when the two measurements differ with  $\leq 5$  mmHg. If either the systolic or diastolic blood pressure differ by  $>5$  mmHg, a fourth measurement is performed and the average calculated from the third and fourth measurement.

### *Blood samples*

Fasting venous blood samples are drawn at all CIDs, except at month 2 for children at Maastricht due to Ethical concerns. Serum samples are collected for analyses of lipids (triglycerides, total, low-density lipoprotein and high-density lipoprotein cholesterol), alanine aminotransferase, aspartate aminotransferase, insulin, C-reactive protein and immunoglobulin E. Plasma is collected for glucose analysis and full blood for HbA1c analysis. All samples are stored locally at  $-80$  °C until shipment to the central lab at Bioiatriki S.A., Greece.

### *Skin prick test*

For adults, a skin prick test is performed on the forearm. One drop of the allergens hazel, alder, birch, grass mix, artemisia absinthium, ragweed, alternaria, moulds mix, cat, dog, dermatophagoides pteronyssinus and dermatophagoides mix as well as positive and negative control solutions are applied. The response is recorded after 15 minutes.

## *Adverse events and concomitant medication*

All AEs experienced after inclusion and during the trial are registered. At CIDs, the participant is asked if he/she has noticed any unfavourable events since the last CID. During the 10-month randomised intervention period, participants - regardless of intervention - are asked directly about certain AEs that may be related to consumption of S&SE i.e. gastrointestinal symptoms and headache. All medication necessary for the participants' health and which is not in the protocol exclusion criteria may be continued during the trial. At CIDs, the participant is asked if he/she has taken any new medicine or has changed dosage of already registered medicine.

## Other outcomes

Questionnaires are used to obtain information about sociodemographic characteristics such as education, occupation, household income etc., physical activity, quality of life, and to investigate subjective neuro-behavioural indices e.g. food preferences and preference for sweet taste, perception of S&SEs, cravings, subjective appetite sensations, and perception and evaluation of the 10-month randomised intervention period. Furthermore, puberty is assessed for children. All questionnaires are prepared in English and later translated into local language. The majority of questionnaires will be delivered by a Questionnaire Delivery Platform (QDP) implemented by NetUnion, Switzerland. At baseline all questionnaires are completed at the intervention sites, but before other CIDs adults can complete those delivered by the QDP at home prior to the CID. Children always complete all questionnaires at the intervention site. Two questionnaires are always completed at the intervention site; one about perception of S&SEs (delivered by the Qualtrics platform via a weblink) and one about food rewards assessed by the Leeds Food Preference Questionnaire (E-prime software).

## **Statistical methods**

### Sample size determination

The sample size calculation is based on adults for the two primary outcomes. For body weight, a clinically meaningful effect of 1.5 kg placebo subtracted body weight has previously been

1  
2 approved by the European Food Safety Authority.[21] Based on a similar trial [22] we estimated  
3  
4 that a difference of 1.5 kg with a SD of  $\pm 3.5$  kg, a 90% power, a two-sided  $\alpha$  of 0.05 and an  
5  
6 estimated drop-out of 30% would require inclusion of minimum 330 adult participants. For  
7  
8 change in gut microbiota, a  $\pm 10\%$  change in 20 of the 50 most abundant operational taxonomic  
9  
10 units (OTUs) with an alpha of  $<0.05\%$ , would require 100 complete samples. The inclusion of at  
11  
12 least 330 adults (approximately 25% of the participants per intervention site) is therefore also  
13  
14 sufficient to detect possible changes in gut microbiota.  
15  
16  
17  
18  
19  
20  
21  
22  
23  
24  
25  
26  
27  
28  
29  
30  
31  
32  
33  
34  
35  
36  
37  
38  
39  
40  
41  
42  
43  
44  
45  
46  
47  
48  
49  
50  
51  
52  
53  
54  
55  
56  
57  
58  
59  
60

## Statistical analysis plan

As part of the SWEET project a statistical analysis plan has been developed. For body weight, 1-year change between the two interventions will be analysed by analysis of covariance (ANCOVA) linear mixed model, with change in body weight as response; treatment group and relevant covariates e.g. age, gender and BMI, are fixed effects, and participant ID and intervention site are random (intercept) effects. Intention-to-treat principle will be applied on those completing the initial 2-month period. Additionally, complete-case analyses (all dropouts omitted) and per protocol analyses (only compliant participants) as well as analyses including additional covariate adjustments and intermediate time points will be applied.

For gut microbiota, 1-year change in microbial diversity and microbial composition (relative abundance at phyla and genera level) will be analysed. Paired Wilcoxon test is used to study within intervention changes in relative abundance, and linear mixed models with Benjamin-Hochberg correction for multiple testing will be used for between intervention comparisons.

Data will be presented with the use of standard descriptive statistics shown as mean (SD) or median (Q1:Q3) for normally and non-normally distributed data, respectively, and categorical data by percentages. Results will be presented as mean difference in changes  $\pm$  SEM or 95% CIs and p-values when relevant. A statistical level of 0.05 will be applied and graphical models will be carried out to assess model assumptions. When relevant, transformation e.g. logarithm will be applied or non-parametric statistical tests will be performed.

For secondary outcomes on continuous data, the main analysis will compare the 1-year mean change between the two treatment groups by use of the ANCOVA-type linear mixed model defined above without any multiplicity adjustment or imputation of missing values (i.e. available-case analyses). Additional sensitivity analyses may be carried out as appropriate in the same way as for the primary outcome. Furthermore, analysis of repeated measures will be performed using linear mixed models including time $\times$ treatment interaction, time, and treatment effects, covariates (e.g. age, gender, BMI) as fixed effects, and participant ID and intervention sites as random

1  
2 effect. In case of significant time×treatment interaction, differences between treatments will be  
3  
4 identified per time point. Mean changes will be compared between the groups using the estimated  
5  
6 mean difference and approximate t-tests derived from the fitted linear mixed models (assuming a  
7  
8 two-sided alternative). For secondary categorical outcome e.g. (yes/no, 0/1/2, etc.) logistic or  
9  
10 ordinal mixed effects model including the same fixed and random effects as the linear mixed  
11  
12 models will be used.  
13  
14  
15  
16

## 17 **ETHICS AND DISSEMINATION**

18  
19  
20 The trial will be conducted in accordance with the Declaration of Helsinki[23] and this master  
21  
22 protocol (version 3.0, 28-Oct-2020) is approved by the responsible national/regional committee  
23  
24 in the 4 countries from where consent to all previously and future amendments to the protocol  
25  
26 was and will be obtained. All adults receive the LED products free of charge. At Copenhagen,  
27  
28 Navarra and Athens participants will not receive reimbursement for their participation. At  
29  
30 Maastricht, travel expenses and financial compensation are provided to all eligible participants  
31  
32 (125 Euros for adults without child(ren) and 250 Euros for one adult and one child + 80 Euros per  
33  
34 extra family member).  
35  
36  
37

38  
39 There are no risks related to the dietary interventions, however discomfort may occur. The  
40  
41 LED (not provided for children) contains all needed nutrients, but only little energy and therefore  
42  
43 adults may experience headaches, dizziness, tiredness and nausea particularly in the first few  
44  
45 days. Constipation, stomach cramps or more profound nausea can occur and information on this  
46  
47 is given before inclusion, however allergic reactions to the LED, are rare. The sugar and S&SEs  
48  
49 intervention products are commercially available foods and drinks purchased in the supermarket  
50  
51 and no adverse side effects are expected. However, changes in gastrointestinal symptoms e.g.  
52  
53 bloating and excess gas production may occur depending on the participant's habitual intakes of  
54  
55 fibre and types of S&SEs e.g. sugar alcohols. At each intervention site a physician can be  
56  
57 consulted in case of medical uncertainties.  
58  
59  
60

1  
2  
3  
4  
5  
6  
7  
8  
9  
10  
11  
12  
13  
14  
15  
16  
17  
18  
19  
20  
21  
22  
23  
24  
25  
26  
27  
28  
29  
30  
31  
32  
33  
34  
35  
36  
37  
38  
39  
40  
41  
42  
43  
44  
45  
46  
47  
48  
49  
50  
51  
52  
53  
54  
55  
56  
57  
58  
59  
60

Some study procedures involve risks, however, the procedures implemented are designed to minimize these. Drawing blood samples will seldom cause harm besides that associated with the insertion, however children will be offered local anaesthetic Emla patches to reduce pain. A maximum of 80 ml and 125 ml of blood is drawn during the 1-year trial for children and adults, respectively. For children, this is less than 1 ml blood/kg body weight per donation which is considered safe. Fertile women will be tested for pregnancy before DXA scanning and excluded from the trial if pregnant. The DXA scans will induce minor radiation ( $<0.010$  mSv per scan). Scanning will be done 2 and 3 times during the 1-year trial for children and adults, respectively, and only one re-scan will be allowed per CID. The skin prick test, only performed in adults, is anticipated to cause very little discomfort. A positive reaction, may cause itching, which will be treated with a salve. In very rare cases a systemic anaphylactic reaction can occur and emergency equipment is in place.

For children, special attention is given to ensure that the child is not forced to participate by the adult family member. Furthermore, a child cannot remain included if the adult family member drops out or is excluded from the trial.

All participants will be insured against injury caused by their participation according to local legal requirements. The trial is monitored by European clinical research infrastructure network (ECRIN) to ensure compliance with the protocol and SOPs. All trial-related information will be recorded, handled and stored safely allowing accurate reporting, interpretation and verification. All data will be collected in a central DataHub at Copenhagen from where pseudo-anonymised data can be requested before 2032 via a data sharing contract. From 2032 fully anonymised data can be transferred. Source data is collected on paper first or is entered directly into the electronic systems e.g. the QDP, the Qualtrics platform and/or the Research Electronic Data Capture (REDCap) tool hosted at University of Copenhagen.[24,25] REDCap is a secure, web-based software platform designed to support data capture. Source data from DXA scans and analysis of biological material are registered on the device or related hardware, whereas the source data from

1  
2 dietary records (handwritten on paper) will be entered into a national software program for  
3  
4 analysis. The sponsor/investigator will provide direct access to source data/documents for  
5  
6 inspection.  
7  
8

9 Results will be published in international peer-reviewed scientific journals regardless of  
10  
11 whether the findings are positive, negative or inconclusive.  
12  
13  
14  
15  
16  
17  
18  
19  
20  
21  
22  
23  
24  
25  
26  
27  
28  
29  
30  
31  
32  
33  
34  
35  
36  
37  
38  
39  
40  
41  
42  
43  
44  
45  
46  
47  
48  
49  
50  
51  
52  
53  
54  
55  
56  
57  
58  
59  
60

For peer review only



## **AUTHORS' CONTRIBUTIONS**

The SWEET EU-project was initiated by JCGH, AR, and JH. The protocol for the SWEET intervention trial was written by LK, AR and YM, LK, AR, YM, EEB and JAM contributed to the design of the trial. AR, YM, EEB, and JAM are principal investigators (PI) at the 4 intervention sites. LK and AR drafted the manuscript and YM, EEB and JAM critically reviewed the manuscript. All authors read and approved the final manuscript.

## **FUNDING STATEMENT**

PI, AR, is also the sponsor (e-mail: [ara@nexs.ku.dk](mailto:ara@nexs.ku.dk), Phone: +45 21 30 69 12, Department of Nutrition, Exercise and Sports, University of Copenhagen, Rolighedsvej 26, 1958 Frederiksberg, Denmark). The trial is funded by the Horizon2020 program: *Sweeteners and sweetness enhancers: Impact on health, obesity, safety and sustainability* (acronym: SWEET, grant # 774293) and funding covers salary for project personal, supplies, remuneration, and dissemination of results. The amount is deposited in a project account subject to audits/public revision.

## **COMPETING INTERESTS STATEMENT**

AR has received honoraria from Unilever, Nordic Sugar, and the International Sweeteners Association. CEH's research centre provides consultancy to, and has received travel funds to present research results from organisations supported by food and drink companies. JCGH and JH have received project funds from the American Beverage Association. TL works for a company, NetUnion sarl, which has no conflict of interest in the study outcome.

## REFERENCES

- 1 World Health Organization (WHO). Noncommunicable diseases country profiles 2018. Geneva: 2018.
- 2 World Health Organization (WHO). Guideline: Sugar intake for adults and children. Geneva: 2015.
- 3 Nordic Council of Ministers. *Nordic Nutrition Recommendations 2012. Integrating nutrition and physical activity*. Norden 2014.
- 4 Technical University of Denmark (DTU) The National Food Institute. Dietary habits in Denmark 2011-2013 [Report in Danish: Danskernes kostvaner 2011-2013]. Denmark: 2015.
- 5 Institute of Preventive Medicine Environmental and Occupational Health Propilepsis. National dietary guidelines for Greek adults and children. Greece: 2014.
- 6 Ruiz E, Rodriguez P, Valero T, *et al*. Dietary Intake of Individual (Free and Intrinsic) Sugars and Food Sources in the Spanish Population : Findings from the ANIBES Study. *Nutrients* 2017;**9**. doi:10.3390/nu9030275
- 7 Diewertje S, van Less L, Engelen AI, *et al*. Total, free, and added sugar consumption and adherence to guidelines: The Dutch National Food Consumption Survey 2007-2010. *Nutrients* 2016;**8**. doi:10.3390/nu8020070
- 8 Nettleton JE, Reimer RA, Shearer J. Reshaping the gut microbiota : Impact of low calorie sweeteners and the link to insulin resistance? *Physiology & Behavior* 2016;**164**:488–93. doi:10.1016/j.physbeh.2016.04.029
- 9 Sylvestsky AC, Rother KI. Trends in the Consumption of Low-Calorie Sweeteners. *Physiol Behav* 2016;**164**:446–50. doi:10.1016/j.physbeh.2016.03.030
- 10 O'Connor D, Pang M, Castelnovo G, *et al*. A rational review on the effects of sweeteners and sweetness enhancers on appetite, food reward and metabolic/adiposity outcomes in adults. *Food and Function* 2021;**12**:442–65. doi:10.1039/d0fo02424d
- 11 Rogers PJ, Appleton KM. The effects of low-calorie sweeteners on energy intake and body weight: a systematic review and meta-analyses of sustained intervention studies. *International Journal of Obesity* 2021;**45**:464–78. doi:10.1038/s41366-020-00704-2
- 12 Toews I, Lohner S, Küllenberg De Gaudry D, *et al*. Association between intake of non-sugar sweeteners and health outcomes: Systematic review and meta-analyses of randomised and non-randomised controlled trials and observational studies. *BMJ* 2019;**364**:k4718. doi:10.1136/bmj.k4718
- 13 Anker CCB, Rafiq S, Jeppesen PB. Effect of steviol glycosides on human health with emphasis on type 2 diabetic biomarkers: A systematic review and meta-analysis of randomized controlled trials. *Nutrients* 2019;**11**:1965. doi:10.3390/nu11091965
- 14 Peters JC, Beck J, Cardel M, *et al*. The Effects of Water and Non-Nutritive Sweetened Beverages on Weight Loss and Weight Maintenance: A Randomized Clinical Trial. *Obesity* 2016;**24**:297–304. doi:10.1002/oby.21327
- 15 Normand M, Ritz C, Mela D, *et al*. Low-energy sweeteners and body weight: A citation network analysis. *BMJ Nutrition, Prevention and Health* 2021;**4**:319–32. doi:10.1136/bmjnph-2020-000210

- 1  
2  
3 16 Greyling A, Appleton KM, Raben A, *et al.* Acute glycaemic and insulinemic effects of low-energy  
4 sweeteners: A systematic review and meta-analysis of randomized controlled trials. *American*  
5 *Journal of Clinical Nutrition* 2020;**112**:1002–14. doi:10.1093/ajcn/nqaa167  
6  
7 17 Nichol AD, Holle MJ, An R. Glycaemic impact of non-nutritive sweeteners: A systematic review  
8 and meta-analysis of randomized controlled trials. *European Journal of Clinical Nutrition*  
9 2018;**72**:796–804. doi:10.1038/s41430-018-0170-6  
10  
11 18 Suez J, Korem T, Zeevi D, *et al.* Artificial sweeteners induce glucose intolerance by altering the  
12 gut microbiota. *Nature* 2014;**514**:181–6. doi:10.1038/nature13793  
13  
14 19 Barlow SE, Expert Committee. Expert Committee Recommendations Regarding the Prevention,  
15 Assessment, and Treatment of Child and Adolescent Overweight and Obesity: Summary Report.  
16 *Pediatrics* 2007;**120**:S164–92. doi:10.1542/peds.2007-2329C  
17  
18 20 Henry C. Basal metabolic rate studies in humans: measurement and development of new equations.  
19 *Public Health Nutrition* 2005;**8**:1133–52. doi:10.1079/phn2005801  
20  
21 21 EFSA Panel on Dietetic Products Nutrition and Allergies (NDA). Scientific Opinion on the  
22 substantiation of health claims related to konjac mannan (glucomannan) and reduction of body  
23 weight (ID 854, 1556, 3725), reduction of post-prandial glycaemic responses (ID 1559),  
24 maintenance of normal blood glucose concentration. *EFSA Journal* 2010;**8**:1798.  
25 doi:10.2903/j.efsa.2010.1798  
26  
27 22 Peters JC, Wyatt HR, Foster GD, *et al.* The Effects of Water and Non-Nutritive Sweetened  
28 Beverages on Weight Loss During a 12-week Weight Loss Treatment Program. *Obesity*  
29 2014;**22**:1415–21. doi:10.1002/oby.20737  
30  
31 23 World Medical Association. World Medical Association Declaration of Helsinki: ethical principles  
32 for medical research involving human subjects. *JAMA* 2013;**310**:2191–4. doi:jama.2013.281053  
33  
34 24 Harris PA, Taylor R, Thielke R, *et al.* Research electronic data capture (REDCap)-A metadata-  
35 driven methodology and workflow process for providing translational research informatics support.  
36 *Journal of Biomedical Informatics* 2009;**42**:377–81. doi:10.1016/j.jbi.2008.08.010  
37  
38 25 Harris PA, Taylor R, Minor BL, *et al.* The REDCap consortium: Building an international  
39 community of software platform partners. *Journal of Biomedical Informatics* 2019;**95**:103208.  
40 doi:10.1016/j.jbi.2019.103208  
41  
42  
43  
44  
45  
46  
47  
48  
49  
50  
51  
52  
53  
54  
55  
56  
57  
58  
59  
60

## FIGURE LEGEND

**Figure 1:** Overall study design.

Solid lines are CIDs and dashed lines are dietary counselling sessions where non-fasting body weight of adults is measured. Additionally, LED products for adults will be collected from the intervention site every 2nd or 3rd week during the initial 2-month period.

BMI: body mass index. CID: clinical investigation day; S&SEs, sweeteners and sweetness enhancers.

For peer review only

1  
2  
3  
4  
5  
6  
7  
8  
9  
10  
11  
12  
13  
14  
15  
16  
17  
18  
19  
20  
21  
22  
23  
24  
25  
26  
27  
28  
29  
30  
31  
32  
33  
34  
35  
36  
37  
38  
39  
40  
41

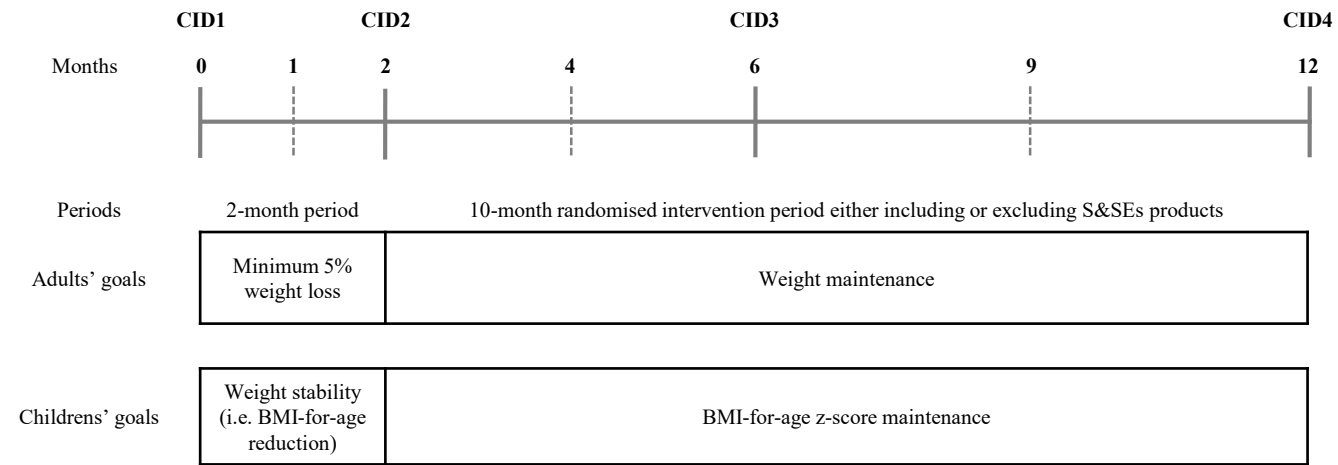

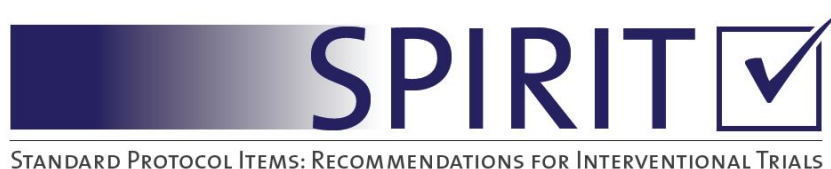

SPIRIT 2013 Checklist: Recommended items to address in a clinical trial protocol and related documents\*

| Section/item                      | Item No | Description                                                                                                                                                                                                                                                                              | Page no. |
|-----------------------------------|---------|------------------------------------------------------------------------------------------------------------------------------------------------------------------------------------------------------------------------------------------------------------------------------------------|----------|
| <b>Administrative information</b> |         |                                                                                                                                                                                                                                                                                          |          |
| Title                             | 1       | Descriptive title identifying the study design, population, interventions, and, if applicable, trial acronym                                                                                                                                                                             | 1        |
| Trial registration                | 2a      | Trial identifier and registry name. If not yet registered, name of intended registry                                                                                                                                                                                                     | 4        |
|                                   | 2b      | All items from the World Health Organization Trial Registration Data Set                                                                                                                                                                                                                 | NA       |
| Protocol version                  | 3       | Date and version identifier                                                                                                                                                                                                                                                              | 18       |
| Funding                           | 4       | Sources and types of financial, material, and other support                                                                                                                                                                                                                              | 21       |
| Roles and responsibilities        | 5a      | Names, affiliations, and roles of protocol contributors                                                                                                                                                                                                                                  | 1-2+21   |
|                                   | 5b      | Name and contact information for the trial sponsor                                                                                                                                                                                                                                       | 21       |
|                                   | 5c      | Role of study sponsor and funders, if any, in study design; collection, management, analysis, and interpretation of data; writing of the report; and the decision to submit the report for publication, including whether they will have ultimate authority over any of these activities | 21       |
|                                   | 5d      | Composition, roles, and responsibilities of the coordinating centre, steering committee, endpoint adjudication committee, data management team, and other individuals or groups overseeing the trial, if applicable (see Item 21a for data monitoring committee)                         | 21       |
| <b>Introduction</b>               |         |                                                                                                                                                                                                                                                                                          |          |
| Background and rationale          | 6a      | Description of research question and justification for undertaking the trial, including summary of relevant studies (published and unpublished) examining benefits and harms for each intervention                                                                                       | 5        |
|                                   | 6b      | Explanation for choice of comparators                                                                                                                                                                                                                                                    | 5        |
| Objectives                        | 7       | Specific objectives or hypotheses                                                                                                                                                                                                                                                        | 6        |

|    |                                                           |     |                                                                                                                                                                                                                                                                                                                                                                                |                      |
|----|-----------------------------------------------------------|-----|--------------------------------------------------------------------------------------------------------------------------------------------------------------------------------------------------------------------------------------------------------------------------------------------------------------------------------------------------------------------------------|----------------------|
| 1  |                                                           |     |                                                                                                                                                                                                                                                                                                                                                                                |                      |
| 2  | Trial design                                              | 8   | Description of trial design including type of trial (eg, parallel group, crossover, factorial, single group), allocation ratio, and framework (eg, superiority, equivalence, noninferiority, exploratory)                                                                                                                                                                      | 6-7+9                |
| 3  |                                                           |     |                                                                                                                                                                                                                                                                                                                                                                                |                      |
| 4  |                                                           |     |                                                                                                                                                                                                                                                                                                                                                                                |                      |
| 5  |                                                           |     |                                                                                                                                                                                                                                                                                                                                                                                |                      |
| 6  |                                                           |     |                                                                                                                                                                                                                                                                                                                                                                                |                      |
| 7  |                                                           |     |                                                                                                                                                                                                                                                                                                                                                                                |                      |
| 8  | <b>Methods: Participants, interventions, and outcomes</b> |     |                                                                                                                                                                                                                                                                                                                                                                                |                      |
| 9  |                                                           |     |                                                                                                                                                                                                                                                                                                                                                                                |                      |
| 10 | Study setting                                             | 9   | Description of study settings (eg, community clinic, academic hospital) and list of countries where data will be collected. Reference to where list of study sites can be obtained                                                                                                                                                                                             | 6                    |
| 11 |                                                           |     |                                                                                                                                                                                                                                                                                                                                                                                |                      |
| 12 |                                                           |     |                                                                                                                                                                                                                                                                                                                                                                                |                      |
| 13 |                                                           |     |                                                                                                                                                                                                                                                                                                                                                                                |                      |
| 14 | Eligibility criteria                                      | 10  | Inclusion and exclusion criteria for participants. If applicable, eligibility criteria for study centres and individuals who will perform the interventions (eg, surgeons, psychotherapists)                                                                                                                                                                                   | 7-8+<br>Table 1      |
| 15 |                                                           |     |                                                                                                                                                                                                                                                                                                                                                                                |                      |
| 16 |                                                           |     |                                                                                                                                                                                                                                                                                                                                                                                |                      |
| 17 |                                                           |     |                                                                                                                                                                                                                                                                                                                                                                                |                      |
| 18 |                                                           |     |                                                                                                                                                                                                                                                                                                                                                                                |                      |
| 19 | Interventions                                             | 11a | Interventions for each group with sufficient detail to allow replication, including how and when they will be administered                                                                                                                                                                                                                                                     | 9-11 +<br>Table 2+3  |
| 20 |                                                           |     |                                                                                                                                                                                                                                                                                                                                                                                |                      |
| 21 |                                                           |     |                                                                                                                                                                                                                                                                                                                                                                                |                      |
| 22 |                                                           | 11b | Criteria for discontinuing or modifying allocated interventions for a given trial participant (eg, drug dose change in response to harms, participant request, or improving/worsening disease)                                                                                                                                                                                 | 8                    |
| 23 |                                                           |     |                                                                                                                                                                                                                                                                                                                                                                                |                      |
| 24 |                                                           |     |                                                                                                                                                                                                                                                                                                                                                                                |                      |
| 25 |                                                           |     |                                                                                                                                                                                                                                                                                                                                                                                |                      |
| 26 |                                                           | 11c | Strategies to improve adherence to intervention protocols, and any procedures for monitoring adherence (eg, drug tablet return, laboratory tests)                                                                                                                                                                                                                              | 12                   |
| 27 |                                                           |     |                                                                                                                                                                                                                                                                                                                                                                                |                      |
| 28 |                                                           |     |                                                                                                                                                                                                                                                                                                                                                                                |                      |
| 29 |                                                           |     |                                                                                                                                                                                                                                                                                                                                                                                |                      |
| 30 |                                                           |     |                                                                                                                                                                                                                                                                                                                                                                                |                      |
| 31 |                                                           | 11d | Relevant concomitant care and interventions that are permitted or prohibited during the trial                                                                                                                                                                                                                                                                                  | Table 1              |
| 32 |                                                           |     |                                                                                                                                                                                                                                                                                                                                                                                |                      |
| 33 |                                                           |     |                                                                                                                                                                                                                                                                                                                                                                                |                      |
| 34 | Outcomes                                                  | 12  | Primary, secondary, and other outcomes, including the specific measurement variable (eg, systolic blood pressure), analysis metric (eg, change from baseline, final value, time to event), method of aggregation (eg, median, proportion), and time point for each outcome. Explanation of the clinical relevance of chosen efficacy and harm outcomes is strongly recommended | 14-17                |
| 35 |                                                           |     |                                                                                                                                                                                                                                                                                                                                                                                |                      |
| 36 |                                                           |     |                                                                                                                                                                                                                                                                                                                                                                                |                      |
| 37 |                                                           |     |                                                                                                                                                                                                                                                                                                                                                                                |                      |
| 38 |                                                           |     |                                                                                                                                                                                                                                                                                                                                                                                |                      |
| 39 |                                                           |     |                                                                                                                                                                                                                                                                                                                                                                                |                      |
| 40 |                                                           |     |                                                                                                                                                                                                                                                                                                                                                                                |                      |
| 41 |                                                           |     |                                                                                                                                                                                                                                                                                                                                                                                |                      |
| 42 | Participant timeline                                      | 13  | Time schedule of enrolment, interventions (including any run-ins and washouts), assessments, and visits for participants. A schematic diagram is highly recommended (see Figure)                                                                                                                                                                                               | Figure 1<br>+Table 4 |
| 43 |                                                           |     |                                                                                                                                                                                                                                                                                                                                                                                |                      |
| 44 |                                                           |     |                                                                                                                                                                                                                                                                                                                                                                                |                      |
| 45 |                                                           |     |                                                                                                                                                                                                                                                                                                                                                                                |                      |
| 46 | Sample size                                               | 14  | Estimated number of participants needed to achieve study objectives and how it was determined, including clinical and statistical assumptions supporting any sample size calculations                                                                                                                                                                                          | 17                   |
| 47 |                                                           |     |                                                                                                                                                                                                                                                                                                                                                                                |                      |
| 48 |                                                           |     |                                                                                                                                                                                                                                                                                                                                                                                |                      |
| 49 |                                                           |     |                                                                                                                                                                                                                                                                                                                                                                                |                      |
| 50 |                                                           |     |                                                                                                                                                                                                                                                                                                                                                                                |                      |
| 51 | Recruitment                                               | 15  | Strategies for achieving adequate participant enrolment to reach target sample size                                                                                                                                                                                                                                                                                            | 7-8                  |
| 52 |                                                           |     |                                                                                                                                                                                                                                                                                                                                                                                |                      |
| 53 |                                                           |     |                                                                                                                                                                                                                                                                                                                                                                                |                      |

#### Methods: Assignment of interventions (for controlled trials)

Allocation:

56  
57  
58  
59  
60

|    |                                                           |     |                                                                          |       |
|----|-----------------------------------------------------------|-----|--------------------------------------------------------------------------|-------|
| 1  |                                                           |     |                                                                          |       |
| 2  | Sequence                                                  | 16a | Method of generating the allocation sequence (eg, computer-              |       |
| 3  | generation                                                |     | generated random numbers), and list of any factors for stratification.   |       |
| 4  |                                                           |     | To reduce predictability of a random sequence, details of any            |       |
| 5  |                                                           |     | planned restriction (eg, blocking) should be provided in a separate      | 9     |
| 6  |                                                           |     | document that is unavailable to those who enrol participants or          |       |
| 7  |                                                           |     | assign interventions                                                     |       |
| 8  |                                                           |     |                                                                          |       |
| 9  |                                                           |     |                                                                          |       |
| 10 | Allocation                                                | 16b | Mechanism of implementing the allocation sequence (eg, central           |       |
| 11 | concealment                                               |     | telephone; sequentially numbered, opaque, sealed envelopes),             |       |
| 12 | mechanism                                                 |     | describing any steps to conceal the sequence until interventions are     | 9     |
| 13 |                                                           |     | assigned                                                                 |       |
| 14 |                                                           |     |                                                                          |       |
| 15 | Implementation                                            | 16c | Who will generate the allocation sequence, who will enrol                |       |
| 16 |                                                           |     | participants, and who will assign participants to interventions          | 9     |
| 17 |                                                           |     |                                                                          |       |
| 18 |                                                           |     |                                                                          |       |
| 19 | Blinding                                                  | 17a | Who will be blinded after assignment to interventions (eg, trial         |       |
| 20 | (masking)                                                 |     | participants, care providers, outcome assessors, data analysts), and     | 11    |
| 21 |                                                           |     | how                                                                      |       |
| 22 |                                                           |     |                                                                          |       |
| 23 |                                                           | 17b | If blinded, circumstances under which unblinding is permissible, and     |       |
| 24 |                                                           |     | procedure for revealing a participant's allocated intervention during    | 9     |
| 25 |                                                           |     | the trial                                                                |       |
| 26 |                                                           |     |                                                                          |       |
| 27 |                                                           |     |                                                                          |       |
| 28 | <b>Methods: Data collection, management, and analysis</b> |     |                                                                          |       |
| 29 |                                                           |     |                                                                          |       |
| 30 | Data collection                                           | 18a | Plans for assessment and collection of outcome, baseline, and other      |       |
| 31 | methods                                                   |     | trial data, including any related processes to promote data quality      |       |
| 32 |                                                           |     | (eg, duplicate measurements, training of assessors) and a                | 12    |
| 33 |                                                           |     | description of study instruments (eg, questionnaires, laboratory         |       |
| 34 |                                                           |     | tests) along with their reliability and validity, if known. Reference to |       |
| 35 |                                                           |     | where data collection forms can be found, if not in the protocol         |       |
| 36 |                                                           |     |                                                                          |       |
| 37 |                                                           |     |                                                                          |       |
| 38 |                                                           | 18b | Plans to promote participant retention and complete follow-up,           |       |
| 39 |                                                           |     | including list of any outcome data to be collected for participants      | 17    |
| 40 |                                                           |     | who discontinue or deviate from intervention protocols                   |       |
| 41 |                                                           |     |                                                                          |       |
| 42 | Data                                                      | 19  | Plans for data entry, coding, security, and storage, including any       |       |
| 43 | management                                                |     | related processes to promote data quality (eg, double data entry;        |       |
| 44 |                                                           |     | range checks for data values). Reference to where details of data        | 20    |
| 45 |                                                           |     | management procedures can be found, if not in the protocol               |       |
| 46 |                                                           |     |                                                                          |       |
| 47 |                                                           |     |                                                                          |       |
| 48 | Statistical                                               | 20a | Statistical methods for analysing primary and secondary outcomes.        |       |
| 49 | methods                                                   |     | Reference to where other details of the statistical analysis plan can    | 17-18 |
| 50 |                                                           |     | be found, if not in the protocol                                         |       |
| 51 |                                                           |     |                                                                          |       |
| 52 |                                                           | 20b | Methods for any additional analyses (eg, subgroup and adjusted           |       |
| 53 |                                                           |     | analyses)                                                                | 17-18 |
| 54 |                                                           |     |                                                                          |       |
| 55 |                                                           | 20c | Definition of analysis population relating to protocol non-adherence     |       |
| 56 |                                                           |     | (eg, as randomised analysis), and any statistical methods to handle      | 18    |
| 57 |                                                           |     | missing data (eg, multiple imputation)                                   |       |
| 58 |                                                           |     |                                                                          |       |
| 59 |                                                           |     |                                                                          |       |
| 60 |                                                           |     |                                                                          |       |



|    |                                 |     |                                                                                                                                                                                                                                                                                                                                       |       |
|----|---------------------------------|-----|---------------------------------------------------------------------------------------------------------------------------------------------------------------------------------------------------------------------------------------------------------------------------------------------------------------------------------------|-------|
| 1  |                                 |     |                                                                                                                                                                                                                                                                                                                                       |       |
| 2  | <b>Methods: Monitoring</b>      |     |                                                                                                                                                                                                                                                                                                                                       |       |
| 3  |                                 |     |                                                                                                                                                                                                                                                                                                                                       |       |
| 4  | Data monitoring                 | 21a | Composition of data monitoring committee (DMC); summary of its role and reporting structure; statement of whether it is independent from the sponsor and competing interests; and reference to where further details about its charter can be found, if not in the protocol. Alternatively, an explanation of why a DMC is not needed | 20    |
| 5  |                                 |     |                                                                                                                                                                                                                                                                                                                                       |       |
| 6  |                                 |     |                                                                                                                                                                                                                                                                                                                                       |       |
| 7  |                                 |     |                                                                                                                                                                                                                                                                                                                                       |       |
| 8  |                                 |     |                                                                                                                                                                                                                                                                                                                                       |       |
| 9  |                                 |     |                                                                                                                                                                                                                                                                                                                                       |       |
| 10 |                                 | 21b | Description of any interim analyses and stopping guidelines, including who will have access to these interim results and make the final decision to terminate the trial                                                                                                                                                               | NR    |
| 11 |                                 |     |                                                                                                                                                                                                                                                                                                                                       |       |
| 12 |                                 |     |                                                                                                                                                                                                                                                                                                                                       |       |
| 13 |                                 |     |                                                                                                                                                                                                                                                                                                                                       |       |
| 14 |                                 |     |                                                                                                                                                                                                                                                                                                                                       |       |
| 15 | Harms                           | 22  | Plans for collecting, assessing, reporting, and managing solicited and spontaneously reported adverse events and other unintended effects of trial interventions or trial conduct                                                                                                                                                     | 16    |
| 16 |                                 |     |                                                                                                                                                                                                                                                                                                                                       |       |
| 17 |                                 |     |                                                                                                                                                                                                                                                                                                                                       |       |
| 18 |                                 |     |                                                                                                                                                                                                                                                                                                                                       |       |
| 19 | Auditing                        | 23  | Frequency and procedures for auditing trial conduct, if any, and whether the process will be independent from investigators and the sponsor                                                                                                                                                                                           | NR    |
| 20 |                                 |     |                                                                                                                                                                                                                                                                                                                                       |       |
| 21 |                                 |     |                                                                                                                                                                                                                                                                                                                                       |       |
| 22 |                                 |     |                                                                                                                                                                                                                                                                                                                                       |       |
| 23 |                                 |     |                                                                                                                                                                                                                                                                                                                                       |       |
| 24 | <b>Ethics and dissemination</b> |     |                                                                                                                                                                                                                                                                                                                                       |       |
| 25 |                                 |     |                                                                                                                                                                                                                                                                                                                                       |       |
| 26 | Research ethics approval        | 24  | Plans for seeking research ethics committee/institutional review board (REC/IRB) approval                                                                                                                                                                                                                                             | 3     |
| 27 |                                 |     |                                                                                                                                                                                                                                                                                                                                       |       |
| 28 |                                 |     |                                                                                                                                                                                                                                                                                                                                       |       |
| 29 | Protocol amendments             | 25  | Plans for communicating important protocol modifications (eg, changes to eligibility criteria, outcomes, analyses) to relevant parties (eg, investigators, REC/IRBs, trial participants, trial registries, journals, regulators)                                                                                                      | 18    |
| 30 |                                 |     |                                                                                                                                                                                                                                                                                                                                       |       |
| 31 |                                 |     |                                                                                                                                                                                                                                                                                                                                       |       |
| 32 |                                 |     |                                                                                                                                                                                                                                                                                                                                       |       |
| 33 |                                 |     |                                                                                                                                                                                                                                                                                                                                       |       |
| 34 |                                 |     |                                                                                                                                                                                                                                                                                                                                       |       |
| 35 | Consent or assent               | 26a | Who will obtain informed consent or assent from potential trial participants or authorised surrogates, and how (see Item 32)                                                                                                                                                                                                          | 7     |
| 36 |                                 |     |                                                                                                                                                                                                                                                                                                                                       |       |
| 37 |                                 |     |                                                                                                                                                                                                                                                                                                                                       |       |
| 38 |                                 | 26b | Additional consent provisions for collection and use of participant data and biological specimens in ancillary studies, if applicable                                                                                                                                                                                                 | NR    |
| 39 |                                 |     |                                                                                                                                                                                                                                                                                                                                       |       |
| 40 |                                 |     |                                                                                                                                                                                                                                                                                                                                       |       |
| 41 | Confidentiality                 | 27  | How personal information about potential and enrolled participants will be collected, shared, and maintained in order to protect confidentiality before, during, and after the trial                                                                                                                                                  | 19-20 |
| 42 |                                 |     |                                                                                                                                                                                                                                                                                                                                       |       |
| 43 |                                 |     |                                                                                                                                                                                                                                                                                                                                       |       |
| 44 |                                 |     |                                                                                                                                                                                                                                                                                                                                       |       |
| 45 |                                 |     |                                                                                                                                                                                                                                                                                                                                       |       |
| 46 | Declaration of interests        | 28  | Financial and other competing interests for principal investigators for the overall trial and each study site                                                                                                                                                                                                                         | 23    |
| 47 |                                 |     |                                                                                                                                                                                                                                                                                                                                       |       |
| 48 |                                 |     |                                                                                                                                                                                                                                                                                                                                       |       |
| 49 | Access to data                  | 29  | Statement of who will have access to the final trial dataset, and disclosure of contractual agreements that limit such access for investigators                                                                                                                                                                                       | 20    |
| 50 |                                 |     |                                                                                                                                                                                                                                                                                                                                       |       |
| 51 |                                 |     |                                                                                                                                                                                                                                                                                                                                       |       |
| 52 |                                 |     |                                                                                                                                                                                                                                                                                                                                       |       |
| 53 | Ancillary and post-trial care   | 30  | Provisions, if any, for ancillary and post-trial care, and for compensation to those who suffer harm from trial participation                                                                                                                                                                                                         | 18-19 |
| 54 |                                 |     |                                                                                                                                                                                                                                                                                                                                       |       |
| 55 |                                 |     |                                                                                                                                                                                                                                                                                                                                       |       |
| 56 |                                 |     |                                                                                                                                                                                                                                                                                                                                       |       |
| 57 |                                 |     |                                                                                                                                                                                                                                                                                                                                       |       |
| 58 |                                 |     |                                                                                                                                                                                                                                                                                                                                       |       |
| 59 |                                 |     |                                                                                                                                                                                                                                                                                                                                       |       |
| 60 |                                 |     |                                                                                                                                                                                                                                                                                                                                       |       |

|    |                   |     |                                                                        |              |
|----|-------------------|-----|------------------------------------------------------------------------|--------------|
| 1  |                   |     |                                                                        |              |
| 2  | Dissemination     | 31a | Plans for investigators and sponsor to communicate trial results to    |              |
| 3  | policy            |     | participants, healthcare professionals, the public, and other relevant | 4+20         |
| 4  |                   |     | groups (eg, via publication, reporting in results databases, or other  |              |
| 5  |                   |     | data sharing arrangements), including any publication restrictions     |              |
| 6  |                   |     |                                                                        |              |
| 7  |                   | 31b | Authorship eligibility guidelines and any intended use of professional | NR           |
| 8  |                   |     | writers                                                                |              |
| 9  |                   |     |                                                                        |              |
| 10 |                   | 31c | Plans, if any, for granting public access to the full protocol,        | 20           |
| 11 |                   |     | participant-level dataset, and statistical code                        |              |
| 12 |                   |     |                                                                        |              |
| 13 |                   |     |                                                                        |              |
| 14 | <b>Appendices</b> |     |                                                                        |              |
| 15 |                   |     |                                                                        |              |
| 16 | Informed consent  | 32  | Model consent form and other related documentation given to            | The master   |
| 17 | materials         |     | participants and authorised surrogates                                 | version can  |
| 18 |                   |     |                                                                        | be delivered |
| 19 |                   |     |                                                                        | by request   |
| 20 |                   |     |                                                                        |              |
| 21 |                   |     |                                                                        |              |
| 22 | Biological        | 33  | Plans for collection, laboratory evaluation, and storage of biological | NR           |
| 23 | specimens         |     | specimens for genetic or molecular analysis in the current trial and   |              |
| 24 |                   |     | for future use in ancillary studies, if applicable                     |              |
| 25 |                   |     |                                                                        |              |

\*It is strongly recommended that this checklist be read in conjunction with the SPIRIT 2013 Explanation & Elaboration for important clarification on the items. Amendments to the protocol should be tracked and dated. The SPIRIT checklist is copyrighted by the SPIRIT Group under the Creative Commons "[Attribution-NonCommercial-NoDerivs 3.0 Unported](https://creativecommons.org/licenses/by-nc-nd/3.0/)" license.

# BMJ Open

**Protocol for a multicentre, parallel, randomised, controlled, trial on the effect of sweeteners and sweetness enhancers on health, obesity and safety in overweight adults and children. The SWEET project.**

|                                 |                                                                                                                                                                                                                                                                                                                                                                                                                                                                                                                                                                                                                                                                                                                                                                                                                                                                                                                                                                                                                                                                                                                                                                                                                                                                                                                                                                                                                                                                                                                                                                                                                                                                                                                                          |
|---------------------------------|------------------------------------------------------------------------------------------------------------------------------------------------------------------------------------------------------------------------------------------------------------------------------------------------------------------------------------------------------------------------------------------------------------------------------------------------------------------------------------------------------------------------------------------------------------------------------------------------------------------------------------------------------------------------------------------------------------------------------------------------------------------------------------------------------------------------------------------------------------------------------------------------------------------------------------------------------------------------------------------------------------------------------------------------------------------------------------------------------------------------------------------------------------------------------------------------------------------------------------------------------------------------------------------------------------------------------------------------------------------------------------------------------------------------------------------------------------------------------------------------------------------------------------------------------------------------------------------------------------------------------------------------------------------------------------------------------------------------------------------|
| Journal:                        | <i>BMJ Open</i>                                                                                                                                                                                                                                                                                                                                                                                                                                                                                                                                                                                                                                                                                                                                                                                                                                                                                                                                                                                                                                                                                                                                                                                                                                                                                                                                                                                                                                                                                                                                                                                                                                                                                                                          |
| Manuscript ID                   | bmjopen-2022-061075.R1                                                                                                                                                                                                                                                                                                                                                                                                                                                                                                                                                                                                                                                                                                                                                                                                                                                                                                                                                                                                                                                                                                                                                                                                                                                                                                                                                                                                                                                                                                                                                                                                                                                                                                                   |
| Article Type:                   | Protocol                                                                                                                                                                                                                                                                                                                                                                                                                                                                                                                                                                                                                                                                                                                                                                                                                                                                                                                                                                                                                                                                                                                                                                                                                                                                                                                                                                                                                                                                                                                                                                                                                                                                                                                                 |
| Date Submitted by the Author:   | 21-Jun-2022                                                                                                                                                                                                                                                                                                                                                                                                                                                                                                                                                                                                                                                                                                                                                                                                                                                                                                                                                                                                                                                                                                                                                                                                                                                                                                                                                                                                                                                                                                                                                                                                                                                                                                                              |
| Complete List of Authors:       | <p>Kjølbæk, Louise; University of Copenhagen, Department of Nutrition, Exercise and Sports<br/> Manios, Yannis; Harokopio University of Athens, Department of Nutrition and Dietetics; Hellenic Mediterranean University Research Centre, Institute of Agri-food and Life Sciences<br/> Blaak, Ellen; Maastricht University, Department of Human Biology<br/> Martínez, Jose; University of Navarra, Center for Nutrition Research; IMDEA Food Institute<br/> Feskens, Edith; Wageningen University, Division of Human Nutrition and Health<br/> Finlayson, G; University of Leeds, School of Psychology<br/> Andersen, Sabina ; University of Copenhagen, Department of Nutrition, Exercise and Sports<br/> Reppas, Kyriakos; Harokopio University of Athens, Department of Nutrition and Dietetics<br/> Navas-Carretero, Santiago; University of Navarra, Center for Nutrition Research; Instituto de Salud Carlos III, CIBER Fisiopatología Obesidad y Nutrición (CIBERObn)<br/> Adam, Tanja; Maastricht University, Department of Nutrition &amp; Movement Sciences<br/> Hodgkins, Charo ; University of Surrey, Food, Consumer Behaviour and Health Research Centre<br/> del Álamo, Marta; European Clinical Research Infrastructure Network<br/> Lam, Tony; NetUnion sarl<br/> Moshoyiannis, Hariklia; Bioiatriki S.A., International Reference Laboratory Services<br/> Halford, Jason; University of Leeds, School of Psychology; University of Liverpool, Department of Psychology<br/> Harrold, Joanne; University of Liverpool, Department of Psychology<br/> Raben, Anne; University of Copenhagen, Nutrition, Exercise and Sports; Copenhagen University Hospital - Steno Diabetes Center Copenhagen, Clinical Research</p> |
| <b>Primary Subject Heading</b>: | Nutrition and metabolism                                                                                                                                                                                                                                                                                                                                                                                                                                                                                                                                                                                                                                                                                                                                                                                                                                                                                                                                                                                                                                                                                                                                                                                                                                                                                                                                                                                                                                                                                                                                                                                                                                                                                                                 |
| Secondary Subject Heading:      | Evidence based practice, Diabetes and endocrinology, Public health                                                                                                                                                                                                                                                                                                                                                                                                                                                                                                                                                                                                                                                                                                                                                                                                                                                                                                                                                                                                                                                                                                                                                                                                                                                                                                                                                                                                                                                                                                                                                                                                                                                                       |

1  
2  
3  
4  
5  
6  
7  
8  
9  
10  
11  
12  
13  
14  
15  
16  
17  
18  
19  
20  
21  
22  
23  
24  
25  
26  
27  
28  
29  
30  
31  
32  
33  
34  
35  
36  
37  
38  
39  
40  
41  
42  
43  
44  
45  
46  
47  
48  
49  
50  
51  
52  
53  
54  
55  
56  
57  
58  
59  
60

|           |                                                                                                                                                      |
|-----------|------------------------------------------------------------------------------------------------------------------------------------------------------|
| Keywords: | Nutrition < TROPICAL MEDICINE, DIABETES & ENDOCRINOLOGY,<br>Microbiology < NATURAL SCIENCE DISCIPLINES, MICROBIOLOGY,<br>Allergy < THORACIC MEDICINE |
|           |                                                                                                                                                      |

SCHOLARONE™  
Manuscripts

1  
2  
3  
4  
5  
6  
7  
8  
9  
10  
11  
12  
13  
14  
15  
16  
17  
18  
19  
20  
21  
22  
23  
24  
25  
26  
27  
28  
29  
30  
31  
32  
33  
34  
35  
36  
37  
38  
39  
40  
41  
42  
43  
44  
45  
46  
47  
48  
49  
50  
51  
52  
53  
54  
55  
56  
57  
58  
59  
60

# Protocol for a multicentre, parallel, randomised, controlled, trial on the effect of sweeteners and sweetness enhancers on health, obesity and safety in overweight adults and children. The SWEET project.

Authors: Louise Kjølbæk<sup>1</sup>, Yannis Manios<sup>2,3</sup>, Ellen E Blaak<sup>4</sup>, J Alfredo Martinez<sup>5,6,7</sup>, Edith J M Feskens<sup>8</sup>, Graham Finlayson<sup>9</sup>, Sabina Stoffer Hjorth Andersen<sup>1</sup>, Kyriakos Reppas<sup>2</sup>, Santiago Navas-Carretero<sup>5,7,10</sup>, Tanja C Adams<sup>11</sup>, Charo E Hodgkins<sup>12</sup>, Marta del Álamo<sup>13</sup>, Tony Lam<sup>14</sup>, Hariklia Moshoyiannis<sup>15</sup>, Jason C G Halford<sup>9,16</sup>, Joanne Harrold<sup>16</sup>, Anne Raben<sup>1,17</sup>

<sup>1</sup>Department of Nutrition, Exercise and Sports, University of Copenhagen, Frederiksberg C, Denmark, <sup>2</sup>Department of Nutrition and Dietetics, Harokopio University of Athens, Kallithea Athens, Greece, <sup>3</sup>Institute of Agri-food and Life Sciences, Hellenic Mediterranean University Research Centre, Heraklion, Greece, <sup>4</sup>Department of Human Biology, Maastricht University, Maastricht, Netherlands, <sup>5</sup>Center for Nutrition Research, University of Navarra, Pamplona, Spain, <sup>6</sup>IMDEA Food Institute, Madrid, Spain, <sup>7</sup>Centro de investigación Biomédica en Red, fisiopatología de la obesidad y Nutrición, Instituto de Salud Carlos III, Madrid, Spain, <sup>8</sup>Division of Human Nutrition and Health, Wageningen University, Wageningen, Netherlands, <sup>9</sup>School of Psychology, University of Leeds, Leeds, United Kingdom, <sup>10</sup>Navarra Institute for Health Research, Pamplona, Spain, <sup>11</sup>Department of Nutrition & Movement Sciences, Maastricht University, Maastricht, Netherlands, <sup>12</sup>Food, Consumer Behaviour and Health Research Centre, School of Psychology, University of Surrey, Guildford, United Kingdom, <sup>13</sup>European Clinical Research Infrastructure Network, Paris, France, <sup>14</sup>NetUnion sarl, Lausanne, Switzerland, <sup>15</sup>International Reference Laboratory Services, Bioiatriki S.A., Athens, Greece, <sup>16</sup>Department of Psychology, The University of Liverpool, Liverpool, United Kingdom, <sup>17</sup>Clinical Research, Copenhagen University Hospital - Steno Diabetes Center Copenhagen, Herlev, Denmark.

1 Corresponding author: Louise Kjølbæk, Rolighedsvej 26, 1958 Frederiksberg C, Denmark, +45  
2  
3 3533 1462, FAX NO: +45 3532 1600, [louisekjoelbaek@nexs.ku.dk](mailto:louisekjoelbaek@nexs.ku.dk)  
4

5  
6 Word count: 4000  
7

8  
9  
10 Keywords: sugar, body weight, gut microbiota, weight loss, weight maintenance, weight loss  
11  
12 maintenance, obesity, anthropometry, type 2 diabetes, cardiovascular diseases, allergenicity.  
13  
14  
15  
16  
17  
18  
19  
20  
21  
22  
23  
24  
25  
26  
27  
28  
29  
30  
31  
32  
33  
34  
35  
36  
37  
38  
39  
40  
41  
42  
43  
44  
45  
46  
47  
48  
49  
50  
51  
52  
53  
54  
55  
56  
57  
58  
59  
60

## ABSTRACT

### Introduction

The aim of this randomised controlled trial (RCT) is to investigate if prolonged consumption of sweeteners and sweetness enhancers (S&SEs) within a healthy diet will improve weight loss maintenance and obesity related risk factors, and affect safety markers compared to sugar.

### Methods and analysis

SWEET (Sweeteners and sweetness enhancers: Prolonged effects on health, obesity and safety) is a 1-year multicentre RCT including at least 330 adults with overweight (18-65 years, body mass index (BMI) $>25$  kg/m<sup>2</sup>) and 40 children (6-12 years, BMI-for-age $>85^{\text{th}}$  percentile). In an initial 2-month period, adults will consume a low-energy diet with the aim to achieve  $\geq 5\%$  weight loss. Children are advised to consume a general healthy diet to maintain body weight, thus reducing their BMI-for-age z-score. In the following 10 months, participants will be randomised to follow a healthy *ad libitum* diet with or without S&SE products. Clinical investigations are scheduled at baseline, after 2, 6 and 12 months. The primary outcomes are body weight for efficacy and gut microbiota composition (in relation to metabolic health) for safety, both in adults. Secondary outcomes include anthropometry, risk markers for type-2-diabetes and cardiovascular diseases, questionnaires including e.g. food preferences, craving and appetite, and tests for allergenicity.

### Ethics and dissemination

The trial protocol has been approved by the following national ethical committees; The research ethics committees of the capital region (Denmark), approval code: H-19040679, The medical ethics committee of the University Hospital Maastricht and Maastricht University (Netherlands), approval code: NL70977.068.19 / METC19-056s, Research Ethics Committee of the University of Navarra (Spain), approval code: 2019.146 mod1, Research Ethics Committee of Harokopio University (Greece), approval code: 1810/18-06-2019. The trial will be conducted in accordance

1 with the Declaration of Helsinki. Results will be published in international peer-reviewed  
2  
3 scientific journals regardless of whether the findings are positive, negative or inconclusive.  
4  
5

6 **Trial registration number:** NCT04226911.  
7  
8  
9

### 10 **Strengths and limitations of this trial**

11

- 12 • The trial investigates long-term effects of S&SEs in the contexts of an *ad libitum* healthy diet  
13 including both foods and drinks, compared to sugar.  
14
- 15 • It includes a 2-month weight loss period to determine the effects of S&SE foods and drinks  
16 on longer-term weight maintenance after weight loss, compared to sugar.  
17
- 18 • A broad range of measurements related to health and safety, appetite and food preferences  
19 are included to address concerns raised in relation to consumption of S&SEs.  
20
- 21 • This multicentre trial covers Northern, Central and Southern Europe, thereby reflecting  
22 different geographic distributions of adult and childhood obesity in Europe.  
23
- 24 • A potential limitation is that the number of included children was reduced through the  
25 recruitment period, but this will not affect the two primary outcomes as sample size  
26 determination was done exclusively for adults.  
27  
28  
29  
30  
31  
32  
33  
34  
35  
36  
37  
38  
39  
40  
41  
42  
43  
44  
45  
46  
47  
48  
49  
50  
51  
52  
53  
54  
55  
56  
57  
58  
59  
60



## INTRODUCTION

Obesity is a major global health problem giving rise to increased risk of non-communicable diseases such as type-2-diabetes (T2D) and cardiovascular diseases (CVD).[1] Sustaining energy balance is critical to maintain body weight. However, sugar contributes to the energy density of diets, and may promote a positive energy balance.[2] In 2015, the World Health Organization (WHO) strongly recommended that free sugar intake should constitute <10 energy percentage (E%) and preferably <5 E% as a conditional recommendation.[2] The latter is still not fulfilled by large parts of the population, including Denmark,[3,4] Greece,[5] Spain[6] and Netherlands.[7]

One often-recommended approach to reduce sugar intake is to replace sugar with sweeteners or sweetness enhancers (S&SEs). The use of S&SEs allows products to retain their palatability without the associated calories, creating a perception of a 'healthier' product.[8] Although drinks often constitute the largest part of S&SEs products consumed, S&SEs products also include foods. In the US and worldwide, the consumption of S&SEs products such as desserts, gums and breakfast foods has increased.[9] However, foods with S&SEs have been less extensively investigated. S&SEs comprise a variety of compounds with proposed mechanisms on health parameters,[10] however evidence is conflicting. For example, S&SEs have been claimed to result in detrimental effects on appetite, body weight, glucose metabolism, and gut microbiota.[8] In contrast, several systematic reviews and meta-analysis found no detrimental effects on appetite and body weight – rather on the contrary[11–13] and interestingly, a large 1-year study found S&SEs to be superior to water for weight loss and weight maintenance.[14] Not all reviews have come to the same conclusion, but selective citation of the different studies could be the cause.[15] In relation to postprandial glycemia and insulinemia no differences were observed between S&SEs and controls in recent systematic reviews and meta-analysis.[16,17] Following consumption of S&SEs changes in the gut microbiota composition and functionality have been debated as a food safety issues because some changes in specific bacteria have been associated with diseases and risk markers of diseases.[18,19]. As an example, a change in microbial composition after 7 days consumption of saccharin has been associated with impaired glucose

1 homeostasis.[20] However, that study included only 7 human participants, conclusions were  
2 based on a post-hoc division of responders and non-responders, and there was no control  
3 group.[20] In general, safety concerns have been derived from animal studies using S&SE doses  
4 far above habitual intake in humans and controlled long-term human intervention studies are  
5 warranted.[19]  
6  
7  
8  
9  
10  
11  
12

### 13 **Aim and objectives**

14  
15 The overall aim of the randomised controlled trial (RCT) SWEET (Sweeteners and sweetness  
16 enhancers: Prolonged effects on health, obesity and safety) is to investigate the efficacy and  
17 safety of combined (foods and drinks) and prolonged use of S&SEs - as part of a whole healthy  
18 *ad libitum* diet approach - in a population of overweight adults and children. The two primary  
19 outcomes on efficacy and safety will be assessed in adults by 1-year changes in body weight and  
20 1-year changes in gut microbiota (in relation to metabolic health outcomes), respectively.  
21  
22 Secondary objectives concern the effects on obesity-related risk factors such as fat mass, glucose  
23 metabolism, and lipidemia, as well as safety aspects such as allergenicity. Other outcomes  
24 include appetite sensations, food cravings and preferences and preference for sweet taste.  
25  
26  
27  
28  
29  
30  
31  
32  
33  
34  
35  
36  
37

### 38 **Hypothesis**

39 We hypothesize that prolonged use of S&SEs in foods and drinks will result in improved body  
40 weight control due to increased palatability of the diet and thereby compliance to the  
41 recommendations for a healthy diet, compared to sugar. Further, we hypothesize that there will  
42 be no safety concerns using S&SEs in the long-term.  
43  
44  
45  
46  
47  
48  
49

## 50 **METHODS AND ANALYSIS**

### 51 **Study design**

52  
53  
54 SWEET is conducted in four intervention sites; Athens, (Harokopio University of Athens,  
55 Greece), Copenhagen, (University of Copenhagen, Denmark), Maastricht, (Maastricht  
56 University, Netherlands), and Navarra (University of Navarra, Spain) covering North, Central,  
57  
58  
59  
60

1 South and East Europe thereby reflecting different geographic distributions of obesity in Europe.  
2  
3 In the 1-year trial both adults and families (at least 1 adult and 1 child) are included. The trial  
4  
5 consists of an initial 2-month period followed by a 10-month randomised 2-armed parallel  
6  
7 intervention period. For adults, the goals in these periods are first to achieve a weight loss (WL)  
8  
9 and second to maintain the WL. For children, the goals are first to achieve weight stability and  
10  
11 second to maintain BMI-for-age z-score. The 10-month randomised intervention period will be  
12  
13 carried out by using a “fading visit” approach (Figure 1). During the trial, all participants will  
14  
15 undergo 4 clinical investigation days (CIDs) and will be supervised by dieticians  
16  
17 individually/familywise and/or in groups at least every 3<sup>rd</sup> month.  
18  
19  
20  
21

22 Originally, a 1-year follow up period was planned after the 10-month intervention period;  
23  
24 however, it was omitted due to recruitment delay caused by the Covid-19 pandemic.  
25  
26 Furthermore, the initial plan was to include at least one child per adult (i.e. only families).  
27  
28 However, recruitment turned out to be very difficult and the strategy was changed to also include  
29  
30 adults without children, because the primary outcomes and sample size determinations were  
31  
32 based solely on adults. Screening visits were conducted between 29-Jun-2020 and 27-Sep-2021,  
33  
34 and the last patient last visit (CID at month 12) is scheduled for 30-Sep-2022.  
35  
36  
37

## 38 Patient and public involvement

39  
40 Neither patients nor the public were involved in the design and conduct of the study and they  
41  
42 will not be involved in interpretation, reporting, or dissemination of the trial.  
43  
44  
45

## 46 Participants

### 47 Recruitment and screening

48  
49 Participants were recruited continuously by multiple routes e.g. web-pages, social medias,  
50  
51 newspapers, and registries (local databases or civil registration numbers). Potential adult  
52  
53 participants were pre-screened by phone and answered questions on behalf of their child(ren). If  
54  
55 still eligible and interested after pre-screening, they received written information and were  
56  
57 invited to an information meeting. After the information meeting, an informed consent form and  
58  
59  
60

a general data protection regulation form were signed by the adult participant, and for children by the parents, or person(s) having custody and the site-PI or delegated staff. Thereafter, the screening visit was scheduled. Participants were screened in the fasting state where all in- and exclusion criteria were assessed. The recruitment has ended with inclusion of 341 adults and 38 children.

## Eligibility criteria

Adults (men and women), 18-65 years, BMI $\geq$ 25 kg/m<sup>2</sup> and children (boys and girls), 6-12 years, and BMI-for-age $>$ 85<sup>th</sup> percentile were included. Children were only included if they had an eligible adult family member (i.e. as a family) - a biological relationship was not required. However, it was required that the family lived in the same household at least 4 days/week. Participants were required to have a regular consumption of sugar-containing/sugar-sweetened products and be motivated and willing to be randomised to any of the two intervention groups. All exclusion criteria are listed in Table 1. In- and exclusion criteria are assessed at screening, however the site-PI or delegated personnel has the right to terminate participation at any time if deemed in the participant's best interest, and children are excluded if their adult family member's participation is discontinued.

**Table 1: List of exclusion criteria**

|                           | Adults                                                                                                   | Children                                                                                      |
|---------------------------|----------------------------------------------------------------------------------------------------------|-----------------------------------------------------------------------------------------------|
| <i>General</i>            |                                                                                                          |                                                                                               |
|                           | Weight change $>$ 5% 2 months prior to screening                                                         | Intensive physical training ( $>$ 10 hours of per week)                                       |
|                           | Surgical treatment of obesity                                                                            | Self-reported eating disorders                                                                |
|                           | Blood donation $<$ 3 months prior to study initiation                                                    | Intolerance and allergies expected to interfere with the study                                |
|                           | Change in smoking habits during the last month. (Smoking was allowed and monitored throughout the study) | Insufficient communication with national language                                             |
|                           | Regularly drinking $>$ 21 (men) or $>$ 14 (women) units of alcohol per week                              | Inability, physically or mental, to comply with the procedures required by the study protocol |
|                           | Intensive physical training ( $>$ 10 hours of per week)                                                  | Participant's general condition contraindicates continuing the study                          |
|                           | Self-reported eating disorders                                                                           | Simultaneous participation in other clinical intervention studies                             |
|                           | Intolerance and allergies expected to interfere with the study                                           |                                                                                               |
|                           | Self-reported drug abuse within the previous 12 months                                                   |                                                                                               |
|                           | Night- or shift work that ends later than 11 PM                                                          |                                                                                               |
|                           | For women: Pregnancy, lactation                                                                          |                                                                                               |
|                           | Persons who do not have access to either (mobile) phone or Internet                                      |                                                                                               |
|                           | Insufficient communication with national language                                                        |                                                                                               |
|                           | Inability, physically or mental, to comply with the procedures required by the study protocol            |                                                                                               |
|                           | Participant's general condition contraindicates continuing the study                                     |                                                                                               |
|                           | Simultaneous participation in other clinical intervention studies                                        |                                                                                               |
| <i>Medical conditions</i> |                                                                                                          |                                                                                               |

| Adults                                                                                                                                                              | Children                                                                                                                                                            |
|---------------------------------------------------------------------------------------------------------------------------------------------------------------------|---------------------------------------------------------------------------------------------------------------------------------------------------------------------|
| Diagnosed diabetes mellitus                                                                                                                                         | Diagnosed diabetes mellitus                                                                                                                                         |
| Medical history of CVD (e.g. current angina; myocardial infarction or stroke within the past 6 months; heart failure; symptomatic peripheral vascular disease)      | Other diseases that may influence the study outcomes                                                                                                                |
| Systolic blood pressure above 160 mmHg and/or diastolic blood pressure above 100 mmHg (measured at screening) whether on or off treatment for hypertension          |                                                                                                                                                                     |
| Significant liver diseases e.g. cirrhosis (fatty liver disease allowed)                                                                                             |                                                                                                                                                                     |
| Malignancy which was active or in remission for less than five years after last treatment (local basal and squamous cell skin cancer allowed)                       |                                                                                                                                                                     |
| Active inflammatory bowel disease, celiac disease, chronic pancreatitis or other disorder potentially causing malabsorption                                         |                                                                                                                                                                     |
| Thyroid diseases, except Levothyroxine treatment of hypothyroidism if not on a stable dose for at least 3 months                                                    |                                                                                                                                                                     |
| Psychiatric illness (e.g. major depression, bipolar disorders)                                                                                                      |                                                                                                                                                                     |
| <i>Medication</i>                                                                                                                                                   |                                                                                                                                                                     |
| Use currently or within the previous 3 months of prescription or over the counter medication that had the potential of affecting body weight incl. food supplements | Use currently or within the previous 3 months of prescription or over the counter medication that had the potential of affecting body weight incl. food supplements |
| Exceptions related to medical conditions:                                                                                                                           |                                                                                                                                                                     |
| I) Cholesterol or blood pressure lowering medication were allowed if the participant's dose had not changed during the last 3 months                                |                                                                                                                                                                     |
| II) low dose antidepressants if they, in the judgement of the investigator, did not affect weight or study participation.                                           |                                                                                                                                                                     |
| III) Levothyroxine for treatment of hypothyroidism if on a stable dose for at least 3 months                                                                        |                                                                                                                                                                     |
| <i>Laboratory screening<sup>1</sup></i>                                                                                                                             |                                                                                                                                                                     |
| Glucose >7.0 mmol/L                                                                                                                                                 | -                                                                                                                                                                   |
| Haemoglobin:                                                                                                                                                        |                                                                                                                                                                     |
| women; <7.5 mmol/L (Copenhagen, Maastricht, Navarra, Athens)                                                                                                        |                                                                                                                                                                     |
| men; <8.5 mmol/L (Copenhagen, Maastricht) and <8.1 mmol/L (Navarra, Athens)                                                                                         |                                                                                                                                                                     |
| For Maastricht participants only:                                                                                                                                   |                                                                                                                                                                     |
| Creatinine <50 µmol/L and >100 µmol/L                                                                                                                               |                                                                                                                                                                     |
| ALT >34 IU                                                                                                                                                          |                                                                                                                                                                     |

<sup>1</sup>Fasting blood sample was collected from adults and locally analysed to assess glucose and haemoglobin levels, and some additional values at Maastricht.

ALT, Alanine transaminase; CVD, cardiovascular diseases; IU, international unit

## Randomisation

After screening, eligible participants were randomly assigned to one of the two intervention groups in a 1:1 ratio by a site-specific randomisation list created by a person in Copenhagen not involved in the trial. The randomisation was stratified by gender, age (<40 years or ≥40 years) and BMI (<30 or ≥30 kg/m<sup>2</sup>), and stratification was implemented by sequentially assigning families and adults from each stratum to the two interventions in blocks of 4, using the software R. Each household was randomised to the same intervention determined by the oldest member of the household. Although randomisation was done after screening, it is not revealed to the household/participant before completion of the initial 2-month period.

## Intervention

This 1-year trial is divided into two periods of 2- and 10-months duration (Figure 1) with the second period being the randomised intervention period.

### Two-month period

In the initial 2-month period, adults - regardless of randomisation - receive a low-energy diet (LED) (Cambridge Weight Plan, Northants, United Kingdom). If the clinically relevant criteria for WL of  $\geq 5\%$  [21] is not achieved, the participant will be excluded. During the 2-month period, adults visit the intervention site 2-3 times for collection of LED products, weighing and dietetic counselling. The LED consists of 3,347-4,184 kJ/d, 15-20 E% fat, 35-40 E% protein and 45-50 E% carbohydrate. Four products per day will be provided as shakes, soups, ready-to-drink products and bars. Additionally, 200 g tomatoes, 125 g cucumber, 50 g lettuce and chewing of maximum 6 pieces of sugar-free chewing gum or pastilles per day are allowed. For some adults (e.g. BMI  $>40$  kg/m<sup>2</sup> or achieving a BMI  $\leq 23$  kg/m<sup>2</sup> during the LED without a wish to lose more weight), the LED may be supplemented with milk/yoghurt, but only if it is expected that the required 5% WL can be achieved.

In the initial 2-month period, children are encouraged to follow the dietary recommendations of the American Academy of Paediatrics on the prevention, assessment and treatment of overweight and obesity.[22] The goal is to obtain weight stability, which will reduce BMI-for-age z-score. For children, no weight criterion exists. Therefore, all children can continue into the WM period as long as their adult family member is included. Children are welcome to visit the intervention site for weighing and dietician counselling, however it is not mandatory.

### Ten-month period with S&SEs and sugar diets

During the 10-month randomised intervention period, dietary counselling sessions will be practiced as individual (i.e. household) counselling sessions at months 2 and 6 and when Covid-19 restrictions allow in intervention groups (months 4 and 9). Otherwise, individual counselling sessions will be scheduled. The goals are to maintain WL for adults and BMI-for-age z-score for

children. Further reduction in weight or BMI-for-age z-score is allowed, if the participant is compliant with the intervention, but counselling sessions will only cover maintenance aspects.

The two intervention diets are I) a healthy diet with <10 E% sugar allowing foods and drinks with S&SEs (S&SEs group) and II) a healthy diet with <10 E% sugar not allowing foods and drinks with S&SEs (Sugar group). Both diets are *ad libitum* and S&SEs cover all types (artificial, natural, low-calorie, sugar alcohols, non-caloric) available on the market. To secure dietary adherence calculation of maximum sugar intake (g) will be based on a diet with 9.5 E% sugar. The maximum allowed sugar intake will be calculated individually based on body weight at month 2 (re-calculated at month 6), using the formula by Henry [23] multiplied by the physical activity level (PAL). A unit system for the sugar and S&SEs intake has been developed, where individual maximum sugar intake is converted to a certain number of units per day (and week) (1 unit corresponding to 10 g sugar). One unit of S&SE product in the S&SE group is equal to the amount - in weight or volume - of one unit sugar-rich product in the Sugar group. For the S&SE group, as many sugar-containing products as possible should be replaced by S&SE products. Food exchange lists, covering categories listed in Table 2 including pictures of products, amounts and units per product, guide the participants in the two groups. Additional details and examples of the two interventions are provided in Table 3. Due to the characteristics of the study, blinding is not possible, however all effort to blind study staff taking measurements and persons doing statistical analysis will be done.

**Table 2: Foods and drinks relevant for the 10-month randomized intervention period**

| Category                   | Examples                                                                                                                                                                                     |
|----------------------------|----------------------------------------------------------------------------------------------------------------------------------------------------------------------------------------------|
| Drinks                     | Carbonated soft drinks, fruit juice, non-carbonated soft drinks, cocoa powder, mixture of fruit syrup and water, energy drinks, pre-packed juices and nectars, protein shakes, energy drinks |
| Milk products              | Flavoured yoghurts, yoghurt drinks, milk shakes, chocolate milk, fermented milk, cold butter milk                                                                                            |
| Breakfast cereals          | Breakfast cereals, muesli, cereals bars, rolled oats                                                                                                                                         |
| Sugar, honey and marmalade | Sugar, syrup, honey, marmalade, jam, compote                                                                                                                                                 |
| Chocolate and bars         | Chocolate with and without filling, chocolate bars, chocolate/hazelnut paste/spread, thin sliced chocolate                                                                                   |
| Desserts                   | Pudding, mousse, cold soufflé, custard, strained stewed fruit, Greek jelly, pancakes                                                                                                         |
| Ice cream                  | Ice cream, sorbet, ice lolly                                                                                                                                                                 |
| Candy                      | Wine gum, liquorice, Bon-bon mix, marshmallow, marzipan                                                                                                                                      |
| Cake and biscuits          | Cake, cookies, biscuits, Danish pastry, sponge cake                                                                                                                                          |



**Table 3: Description of diets in the 10-month randomized intervention period**

|                           | <b>Sugar group</b>                                                                                                                                                                                                                       | <b>S&amp;SE group</b>                                                                                                                                                                                                                                                                                                                                                                                                                                                                                                                                                          |
|---------------------------|------------------------------------------------------------------------------------------------------------------------------------------------------------------------------------------------------------------------------------------|--------------------------------------------------------------------------------------------------------------------------------------------------------------------------------------------------------------------------------------------------------------------------------------------------------------------------------------------------------------------------------------------------------------------------------------------------------------------------------------------------------------------------------------------------------------------------------|
| Sugar-containing products | <10 E% added sugar.                                                                                                                                                                                                                      | <10 E% added sugar and as little as possible.                                                                                                                                                                                                                                                                                                                                                                                                                                                                                                                                  |
| S&SE products             | Not allowed.<br>Except for up to 2 pieces of sugar-free chewing gum per day.                                                                                                                                                             | Allowed.<br>And without any restrictions on specific types of S&SEs.                                                                                                                                                                                                                                                                                                                                                                                                                                                                                                           |
| Units                     | Consumption of a maximum number of units (corresponding to 9.5 E% added sugar) of sugar-containing products each day/week.                                                                                                               | Unit calculation (corresponding to 9.5 E% added sugar in weight/volume) will guide the participant to ensure intake of <10 E% added sugar.<br>As many sugar-containing products in the diet as possible should be replaced with S&SE-containing products.<br>Ideally, the amount of S&SEs products corresponding to the maximal units from sugar-containing products should be consumed. However, if a participant experiences an adverse event, they are recommended to consume less than the calculated units and change to other S&SE products (e.g. avoid sugar-alcohols). |
| Example                   | For a participant with an energy requirement of 9,000 kJ/d, 9.5 E% from sugar corresponds to 50 gram added sugar = 5 units. 5 units per day or 35 units per week is then the maximum allowed intake of added sugar for this participant. | For a participant with an energy requirement of 9,000 kJ/d, 9.5 E% from sugar corresponds to 50 gram added sugar = 5 units. Ideally, this participant should consume 5 units per day or 35 units per week of S&SE containing products. One unit is equivalent to 1 unit in the sugar group (in weight or volume).                                                                                                                                                                                                                                                              |

E%, energy percentage; S&SEs, sweeteners and sweetness enhancers.

### *Compliance:*

Participants are required to record intake of all foods and drinks (pen and paper) for 4 days (3 weekdays and 1 weekend day) at months 0 and 12 with information on time, type/brand names, cooking and processing methods, weight or household measures. Daily average intake of energy, macro- and micro-nutrients will be calculated by national nutritional software in the 4 intervention sites. From the food records, amount and intake of sugar and S&SEs in units from the products listed in Table 2 is also assessed at months 0 and 12. Furthermore, adults complete a food frequency questionnaire about intake of sweet products (sFFQ) during the past month and they collect 24-hour urine samples at months 0, 6 and 12. Urinary biomarkers of S&SEs (acesulfame-K, saccharin, sucralose, cyclamate, and steviol glycoronide) as well as fructose and sucrose will be analysed by Wageningen University, Netherlands, and urinary excretion of urea/nitrogen will be analysed locally.

### **Data collection and outcomes**



1 Including information meeting, screening, counselling sessions and CIDs, the trial consists of a  
2  
3 minimum of 10 and 6 visits for adults and children, respectively. Data is collected according to  
4  
5 standard operation procedures (SOPs) and Table 4 shows activities/data collection at each visit.  
6  
7 Most data will be collected at months 0, 2, 6 and 12 where participants have fasted for a  
8  
9 minimum of 10 hours, and avoided intensive physical exercise, coffee and smoking for 12 hours  
10  
11 prior to the CIDs.  
12  
13  
14  
15  
16  
17  
18  
19  
20  
21  
22  
23  
24  
25  
26  
27  
28  
29  
30  
31  
32  
33  
34  
35  
36  
37  
38  
39  
40  
41  
42  
43  
44  
45  
46  
47  
48  
49  
50  
51  
52  
53  
54  
55  
56  
57  
58  
59  
60

For peer review only

Table 4: Flow chart for adults (A) and children (C) (full sampling at months 0 and 12)

|                                                     | Pre-screening | Information meeting | Screening      | Baseline         | 2-month period (CID1-CID2) |                    | 10-month randomised intervention period (CID2-CID4) |                    |                  |                    | 1-year assessment |
|-----------------------------------------------------|---------------|---------------------|----------------|------------------|----------------------------|--------------------|-----------------------------------------------------|--------------------|------------------|--------------------|-------------------|
| CID Visit Month                                     | -<br>-<br>-   | -<br>V0             | -<br>V1        | CID1<br>V2<br>0  | -<br>V3<br>0.5             | -<br>V4<br>1       | CID2<br>V5<br>2                                     | -<br>V6<br>4       | CID3<br>V7<br>6  | -<br>V8<br>9       | CID4<br>V9<br>12  |
| Inclusion/exclusion criteria                        | A+C           |                     | A+C            |                  |                            |                    |                                                     |                    |                  |                    |                   |
| Signing Informed Consent                            |               | A+C <sup>0</sup>    |                |                  |                            |                    |                                                     |                    |                  |                    |                   |
| Med. hist., medication etc.                         |               |                     | A+C            |                  |                            |                    |                                                     |                    |                  |                    |                   |
| Randomisation of the oldest family/household member |               |                     | A              |                  |                            |                    |                                                     |                    |                  |                    |                   |
| Supervision/counselling                             |               |                     |                | A+C <sup>1</sup> |                            | A(+C) <sup>2</sup> | A+C <sup>1</sup>                                    | A(+C) <sup>2</sup> | A+C <sup>1</sup> | A(+C) <sup>2</sup> | A+C <sup>1</sup>  |
| Collection of LED products                          |               |                     |                | A <sup>#</sup>   | A <sup>#</sup>             | A <sup>#</sup>     | A <sup>#</sup>                                      |                    |                  |                    |                   |
| Body weight and height <sup>4</sup>                 |               |                     | A+C            | A+C              | A <sup>3</sup>             | A <sup>3</sup>     | A+C                                                 | A <sup>3</sup>     | A+C              | A <sup>3</sup>     | A+C               |
| Waist and hip circumference                         |               |                     |                | A+C              |                            |                    | A+C                                                 |                    | A+C              |                    | A+C               |
| Body composition                                    |               |                     |                | A+C <sup>5</sup> |                            |                    | A                                                   |                    |                  |                    | A+C <sup>5</sup>  |
| Blood pressure and heart rate                       |               |                     | A+C            | A+C              |                            |                    | A+C                                                 |                    | A+C              |                    | A+C               |
| Fasting blood samples                               |               |                     | A <sup>6</sup> | A+C              |                            |                    | A+C <sup>7</sup>                                    |                    | A+C              |                    | A+C               |
| Adverse events and concomitant medication           |               |                     |                | A+C              |                            |                    | A+C                                                 |                    | A+C              |                    | A+C               |
| Allergenicity (skin prick test)                     |               |                     |                | A                |                            |                    |                                                     |                    |                  |                    | A                 |
| 24h urine collection (content of S&SEs)             |               |                     |                | A                |                            |                    |                                                     | A                  |                  |                    | A                 |
| Faecal spot sample                                  |               |                     |                | A                |                            |                    | A                                                   |                    | A                |                    | A                 |
| 4-day dietary record                                |               |                     |                | A+C              |                            |                    |                                                     |                    |                  |                    | A+C               |
| <b>Questionnaires (electronic platforms):</b>       |               |                     |                |                  |                            |                    |                                                     |                    |                  |                    |                   |
| General background questionnaire                    |               |                     |                | A+C              |                            |                    |                                                     |                    |                  |                    |                   |
| Physical activity                                   |               |                     |                | A+C              |                            |                    |                                                     |                    |                  |                    | A+C               |
| Three factor eating questionnaire                   |               |                     |                | A+C              |                            |                    |                                                     |                    |                  |                    | A+C               |
| Leeds food preference questionnaire                 |               |                     |                | A+C              |                            |                    | A+C                                                 |                    | A+C              |                    | A+C               |
| Allergenicity                                       |               |                     |                | A+C              |                            |                    |                                                     |                    |                  |                    | A+C               |
| Craving for sweet taste                             |               |                     |                | A                |                            |                    |                                                     |                    |                  |                    | A                 |
| Perception of S&SEs                                 |               |                     |                | A                |                            |                    |                                                     |                    | A <sup>8</sup>   |                    | A <sup>8</sup>    |
| Control of eating                                   |               |                     |                | A                |                            |                    | A                                                   |                    | A                |                    | A                 |
| Subjective appetite sensations                      |               |                     |                | A                |                            |                    | A                                                   |                    | A                |                    | A                 |
| Sweet food frequency questionnaire (FFQ)            |               |                     |                | A                |                            |                    |                                                     |                    |                  |                    | A                 |
| Diet satisfaction                                   |               |                     |                | A                |                            |                    |                                                     |                    | A                |                    | A                 |
| Perception and evaluation of the intervention       |               |                     |                |                  |                            |                    |                                                     |                    | A                |                    | A                 |
| Quality of life                                     |               |                     |                | A                |                            |                    |                                                     |                    |                  |                    | A                 |
| Puberty                                             |               |                     |                | C                |                            |                    |                                                     |                    | C                |                    | C                 |

#Adults will collect LED products from the intervention site every 2nd or 3rd week during the 2-month period. At months 0.5 and 1.5 (optional) the adults will be weighed and have the opportunity to consult a dietician.

<sup>0</sup>For children, the informed consent is signed by the parents/guardians.

<sup>1</sup>Individual/family counselling is preferably scheduled at the same day as the CID.

<sup>2</sup>Group counselling, children participation is preferred, but not mandatory.

<sup>3</sup>Fasting is not required for this body weight measurement.

<sup>4</sup>Height is only measured at screening for adults.

<sup>5</sup>At University of Maastricht, body composition is not measured in children.

<sup>6</sup>At screening, fasting blood samples will be analysed at each intervention site. All other blood samples are analysed at the Central Laboratory (Bioiatriki).

<sup>7</sup>At University of Maastricht, a fasting blood sample is not drawn from children at CID2.

<sup>8</sup>A shorter version of the questionnaire is used at CID3-4.

A, adult; C, child; CID, clinical investigation day; LED, low-energy diet; S&SEs, sweeteners and sweetness enhancers.

## Primary outcomes

This trial has two independent primary outcomes. The primary outcome for efficacy is 1-year change in body weight. The primary outcome for safety is 1-year change in gut microbiota composition associated with impaired health (e.g. change in microbial beta-diversity and composition). Both outcomes relate only to adults, and hence the required sample size was calculated for adults only.

### *Body weight*

Body weight is measured to the nearest 0.1 kg using a digital scale with the participant wearing underwear/light clothes. Fasting body weight will be measured at screening and CIDs, however fasting is not required, when body weight is measured at other visits.

### *Gut microbiota*

Gut microbiota composition will be assessed from faecal spot samples collected at home prior to all CIDs. Samples are immediately frozen (-20 °C) and later transported to the intervention site in cooling bags, whereafter they are stored at -80°C. Samples will be analysed targeting the V3-V4 regions of 16s rRNA genes by Illumina sequencing at Maastricht University, Netherlands.

## Secondary outcomes

Secondary outcomes include changes in anthropometry and body composition (for children, BMI-for-age z-score), risk factors for T2D and CVD, allergenicity, adverse events (AE), and concomitant medication. Additionally, some secondary outcomes will be assessed in adult sub-groups e.g. gut-brain signalling markers, postprandial energy expenditure and substrate oxidation, physical activity, liver fat, adipose tissue and lipid metabolism, brain reward, insulin sensitivity markers, and composition and functionality of the human gut microbiota in vitro. Furthermore, children's gut microbiota composition may be analysed depending on the final sample size (Table 5).

## *Anthropometry*

Height is measured to the nearest 0.5 cm using a stadiometer at screening and for children at all CIDs. For adults, BMI is calculated as body weight (kg) / height<sup>2</sup> (m<sup>2</sup>). For children, the WHO AnthroPlus software ([www.who.int/tools/growth-reference-data-for-5to19-years/application-tools](http://www.who.int/tools/growth-reference-data-for-5to19-years/application-tools)) is applied to calculate BMI-for-age percentile and z-score. Waist and hip circumferences are measured twice with a non-elastic tape measure on the skin to the nearest 0.5 cm, and the average is calculated. Waist circumference is measured halfway between the lowest rib and iliac crest during exhalation. Hip circumference is measured as the largest circumference in the area around the buttock. Dual-energy X-ray absorptiometry (DXA) scans are performed in underwear to assess body composition including fat percentage, fat mass and fat free mass.

## *Blood pressure and heart rate*

After minimum 5 minutes rest in a sitting position, blood pressure (mmHg) and heart rate (beats per minute) are measured three times on the right arm with an automatically inflated cuff. An average is calculated from the last two measurements when the two measurements differ with  $\leq 5$  mmHg. If either the systolic or diastolic blood pressure differ by  $>5$  mmHg, a fourth measurement is performed and the average calculated from the third and fourth measurement.

## *Blood samples*

Fasting venous blood samples are drawn at all CIDs, except at month 2 for children at Maastricht due to Ethical concerns. Serum samples are collected for analyses of lipids (triglycerides, total, low-density lipoprotein and high-density lipoprotein cholesterol), alanine aminotransferase, aspartate aminotransferase, insulin, C-reactive protein and immunoglobulin E. Plasma is collected for glucose analysis and full blood for HbA1c analysis. All samples are stored locally at -80 °C until shipment to the central lab at Bioiatriki S.A., Greece.

## *Skin prick test*

For adults, a skin prick test is performed on the forearm. One drop of the allergens hazel, alder, birch, grass mix, artemisia absinthium, ragweed, alternaria, moulds mix, cat, dog,

1  
2 dermatophagoides pteronyssinus and dermatophagoides mix as well as positive and negative  
3  
4 control solutions are applied. The response is recorded after 15 minutes.  
5  
6

### 7 *Adverse events and concomitant medication*

8  
9 All AEs experienced after inclusion and during the trial are registered. At CIDs, the participant is  
10  
11 asked if he/she has noticed any unfavourable events since the last CID. During the 10-month  
12  
13 randomised intervention period, participants - regardless of intervention - are asked directly about  
14  
15 certain AEs that may be related to consumption of S&SE i.e. gastrointestinal symptoms and  
16  
17 headache. All medication necessary for the participants' health and which is not in the protocol  
18  
19 exclusion criteria may be continued during the trial. At CIDs, the participant is asked if he/she  
20  
21 has taken any new medicine or has changed dosage of already registered medicine.  
22  
23  
24  
25

### 26 Other outcomes

27  
28 Questionnaires are used to obtain information about sociodemographic characteristics such as  
29  
30 education, occupation, household income etc., physical activity, quality of life, and to investigate  
31  
32 subjective neuro-behavioural indices e.g. food preferences and preference for sweet taste,  
33  
34 perception of S&SEs, cravings, subjective appetite sensations, and perception and evaluation of  
35  
36 the 10-month randomised intervention period. Furthermore, puberty is assessed for children. All  
37  
38 questionnaires are prepared in English and later translated into local language. The majority of  
39  
40 questionnaires will be delivered by a Questionnaire Delivery Platform (QDP) implemented by  
41  
42 NetUnion, Switzerland. At baseline all questionnaires are completed at the intervention sites, but  
43  
44 before other CIDs adults can complete those delivered by the QDP at home prior to the CID.  
45  
46 Children always complete all questionnaires at the intervention site. Two questionnaires are  
47  
48 always completed at the intervention site; one about perception of S&SEs (delivered by the  
49  
50 Qualtrics platform via a weblink) and one about food rewards assessed by the Leeds Food  
51  
52 Preference Questionnaire (E-prime software).  
53  
54  
55  
56  
57  
58  
59  
60

## Sub-groups and sub-studies

Some of the secondary and other outcomes are collected in sub-studies and in sub-groups of different participants. Table 5 presents outcomes only investigated in sub-groups.

| Outcome                                                                                                  | Measurements and method                                                                                                                                   | Participants                                        | Time points of data collection |                 |                 |                  |
|----------------------------------------------------------------------------------------------------------|-----------------------------------------------------------------------------------------------------------------------------------------------------------|-----------------------------------------------------|--------------------------------|-----------------|-----------------|------------------|
|                                                                                                          |                                                                                                                                                           |                                                     | Baseline                       | After WL        | After WM        |                  |
|                                                                                                          |                                                                                                                                                           |                                                     | Month 0<br>CID1                | Month 2<br>CID2 | Month 6<br>CID3 | Month 12<br>CID4 |
| <b>Sub-studies (include an intervention)</b>                                                             |                                                                                                                                                           |                                                     |                                |                 |                 |                  |
| <b>Brain reward activity</b>                                                                             | Brain activity is measured by fMRI after consumption of a drink with sugar, S&SEs, water                                                                  | Sub-study incl. a sub-group of adults at Maastricht | A                              | A               |                 | A                |
| <b>Postprandial responses (energy expenditure, substrate oxidation, blood biochemistry and appetite)</b> | Indirect calorimetry, blood sampling, appetite sensation based on VAS and <i>ad libitum</i> energy intake after consumption of a drink with S&SE or water | Sub-study incl. a sub-group of adults at Copenhagen | A                              | A               | A               |                  |
| <b>Sub-groups</b>                                                                                        |                                                                                                                                                           |                                                     |                                |                 |                 |                  |
| <b>Physical activity</b>                                                                                 | 7-day measurement by accelerometer                                                                                                                        | Adults at Maastricht                                | A                              |                 | A               | A                |
| <b>Gut-brain signalling markers</b>                                                                      | Analyses of GLP-1, CCK and ghrelin from fasting blood samples                                                                                             | Adults at Copenhagen and Maastricht HUA?            | A                              | A               | A               | A                |
| <b>Liver fat</b>                                                                                         | <sup>1</sup> H-MRS                                                                                                                                        | Sub-group of adults at Maastricht                   | A                              | A               |                 | A                |
| <b>Adipose tissue function and lipid metabolism</b>                                                      | Adipocyte morphology, ex vivo lipolysis, gene and protein expression analyses of adipose tissue samples (biopsy)                                          | Adults at Maastricht                                | A                              | A               |                 | A                |
| <b>Insulin sensitivity markers</b>                                                                       | Indices e.g. HOMA-IR, Matsuda index, Disposition index etc. calculated from a 7-point OGTT                                                                | Adults at Maastricht                                |                                |                 |                 |                  |
| <b>Gut microbiota</b>                                                                                    | 16S rRNA illumine sequencing of faecal samples                                                                                                            | Children at Maastricht                              | C                              |                 | C               | C                |
| <b>Composition and functionality of the human gut microbiota in vitro</b>                                | Microbial metabolites e.g. SCFA and 16S rRNA illumine sequencing of faecal samples                                                                        | Sub-group of adults at Maastricht                   | A                              |                 |                 |                  |

A, adults; C, children; CCK, cholecystokinin; CID, clinical investigation day; fMRI, functional Magnetic Resonance Imaging; GLP-1, glucagon-like peptide 1; <sup>1</sup>H-MRS, Proton Magnetic Resonance Spectroscopy; HOMA-IR, Homeostatic Model Assessment for Insulin Resistance, OGTT, oral glucose tolerance test; SCFA, short chain fatty acids; S&SEs, sweeteners and sweetness enhancers; VAS, visual analogue scales; WL, weight loss, WM, weight maintenance.

## Statistical methods

### Sample size determination

The sample size calculation is based on adults for the two primary outcomes. For body weight, a clinically meaningful effect of 1.5 kg placebo subtracted body weight has previously been approved by the European Food Safety Authority.[24] Based on a similar trial [25] we estimated that a difference of 1.5 kg with a SD of  $\pm 3.5$  kg, a 90% power, a two-sided  $\alpha$  of 0.05, would require 231 completers. With an estimated drop-out of 30% a minimum of 330 adult participants

1  
2 should be included. For change in gut microbiota, a  $\pm 10\%$  change in 20 of the 50 most abundant  
3 operational taxonomic units (OTUs) with an alpha of  $<0.05\%$ , would require 100 complete  
4 samples. The inclusion of at least 330 adults (approximately 25% of the participants per  
5 intervention site) is therefore also sufficient to detect possible changes in gut microbiota.  
6  
7  
8  
9

## 10 11 Statistical analysis plan

12  
13 As part of the SWEET project a statistical analysis plan has been developed. For body weight, 1-  
14 year change between the two interventions will be analysed by analysis of covariance  
15 (ANCOVA) linear mixed model, with change in body weight as response; treatment group and  
16 relevant covariates e.g. age, gender and BMI, are fixed effects, and participant ID and  
17 intervention site are random (intercept) effects. Intention-to-treat principle will be applied on  
18 those completing the initial 2-month period. Additionally, complete-case analyses (all dropouts  
19 omitted) and per protocol analyses (only compliant participants) as well as analyses including  
20 additional covariate adjustments and intermediate time points will be applied.  
21  
22  
23  
24  
25  
26  
27  
28  
29  
30  
31

32 For gut microbiota, 1-year change in microbial diversity and microbial composition (relative  
33 abundance at phyla and genera level) will be analysed. Paired Wilcoxon test is used to study  
34 within intervention changes in relative abundance, and linear mixed models with Benjamin-  
35 Hochberg correction for multiple testing will be used for between intervention comparisons.  
36  
37  
38  
39  
40

41 Data will be presented with the use of standard descriptive statistics shown as mean (SD) or  
42 median (Q1:Q3) for normally and non-normally distributed data, respectively, and categorical  
43 data by percentages. Results will be presented as mean difference in changes  $\pm$  SEM or 95% CIs  
44 and p-values when relevant. A statistical level of 0.05 will be applied and graphical models will  
45 be carried out to assess model assumptions. When relevant, transformation e.g. logarithm will be  
46 applied or non-parametric statistical tests will be performed.  
47  
48  
49  
50  
51  
52  
53  
54

55 For secondary outcomes on continuous data, the main analysis will compare the 1-year mean  
56 change between the two treatment groups by use of the ANCOVA-type linear mixed model  
57 defined above without any multiplicity adjustment or imputation of missing values (i.e. available-  
58  
59  
60

1  
2 case analyses). Additional sensitivity analyses may be carried out as appropriate in the same way  
3  
4 as for the primary outcome. Furthermore, analysis of repeated measures will be performed using  
5  
6 linear mixed models including time×treatment interaction, time, and treatment effects, covariates  
7  
8 (e.g. age, gender, BMI) as fixed effects, and participant ID and intervention sites as random  
9  
10 effect. In case of significant time×treatment interaction, differences between treatments will be  
11  
12 identified per time point. Mean changes will be compared between the groups using the estimated  
13  
14 mean difference and approximate t-tests derived from the fitted linear mixed models (assuming a  
15  
16 two-sided alternative). For secondary categorical outcome e.g. (yes/no, 0/1/2, etc.) logistic or  
17  
18 ordinal mixed effects model including the same fixed and random effects as the linear mixed  
19  
20 models will be used.  
21  
22  
23  
24  
25  
26

## 27 **ETHICS AND DISSEMINATION**

28  
29 The trial will be conducted in accordance with the Declaration of Helsinki[26] and this master  
30  
31 protocol (version 3.0, 28-Oct-2020) is approved by the responsible national/regional committee  
32  
33 in the 4 countries from where consent to all previously and future amendments to the protocol  
34  
35 was and will be obtained. All adults receive the LED products free of charge. At Copenhagen,  
36  
37 Navarra and Athens participants will not receive reimbursement for their participation. At  
38  
39 Maastricht, travel expenses and financial compensation are provided to all eligible participants  
40  
41 (125 Euros for adults without child(ren) and 250 Euros for one adult and one child + 80 Euros per  
42  
43 extra family member).  
44  
45  
46

47 There are no risks related to the dietary interventions, however discomfort may occur. The  
48  
49 LED (not provided for children) contains all needed nutrients, but only little energy and therefore  
50  
51 adults may experience headaches, dizziness, tiredness and nausea particularly in the first few  
52  
53 days. Constipation, stomach cramps or more profound nausea can occur and information on this  
54  
55 is given before inclusion, however allergic reactions to the LED, are rare. The sugar and S&SEs  
56  
57 intervention products are commercially available foods and drinks purchased in the supermarket  
58  
59 and no adverse side effects are expected. However, changes in gastrointestinal symptoms e.g.  
60



1  
2 bloating and excess gas production may occur depending on the participant's habitual intakes of  
3 fibre and types of S&SEs e.g. sugar alcohols. At each intervention site a physician can be  
4 consulted in case of medical uncertainties.  
5  
6  
7  
8

9 Some study procedures involve risks, however, the procedures implemented are designed to  
10 minimize these. Drawing blood samples will seldom cause harm besides that associated with the  
11 insertion, however children will be offered local anaesthetic Emla patches to reduce pain. A  
12 maximum of 80 ml and 125 ml of blood is drawn during the 1-year trial for children and adults,  
13 respectively. For children, this is less than 1 ml blood/kg body weight per donation which is  
14 considered safe. Fertile women will be tested for pregnancy before DXA scanning and excluded  
15 from the trial if pregnant. The DXA scans will induce minor radiation ( $<0.010$  mSv per scan).  
16 Scanning will be done 2 and 3 times during the 1-year trial for children and adults, respectively,  
17 and only one re-scan will be allowed per CID. The skin prick test, only performed in adults, is  
18 anticipated to cause very little discomfort. A positive reaction, may cause itching, which will be  
19 treated with a salve. In very rare cases a systemic anaphylactic reaction can occur and emergency  
20 equipment is in place.  
21  
22  
23  
24  
25  
26  
27  
28  
29  
30  
31  
32  
33  
34  
35  
36

37 For children, special attention is given to ensure that the child is not forced to participate by  
38 the adult family member. Furthermore, a child cannot remain included if the adult family member  
39 drops out or is excluded from the trial.  
40  
41  
42  
43

44 All participants will be insured against injury caused by their participation according to local  
45 legal requirements. The trial is monitored by European clinical research infrastructure network  
46 (ECRIN) to ensure compliance with the protocol and SOPs. All trial-related information will be  
47 recorded, handled and stored safely allowing accurate reporting, interpretation and verification.  
48 All data will be collected in a central DataHub at Copenhagen from where pseudo-anonymised  
49 data can be requested before 2032 via a data sharing contract. From 2032 fully anonymised data  
50 can be transferred. Source data is collected on paper first or is entered directly into the electronic  
51 systems e.g. the QDP, the Qualtrics platform and/or the Research Electronic Data Capture  
52  
53  
54  
55  
56  
57  
58  
59  
60

1  
2 (REDCap) tool hosted at University of Copenhagen.[27,28] REDCap is a secure, web-based  
3  
4 software platform designed to support data capture. Source data from DXA scans and analysis of  
5  
6 biological material are registered on the device or related hardware, whereas the source data from  
7  
8 dietary records (handwritten on paper) will be entered into a national software program for  
9  
10 analysis. The sponsor/investigator will provide direct access to source data/documents for  
11  
12 inspection.  
13  
14  
15

16 Results will be published in international peer-reviewed scientific journals regardless of  
17  
18 whether the findings are positive, negative or inconclusive.  
19  
20  
21  
22  
23  
24  
25  
26  
27  
28  
29  
30  
31  
32  
33  
34  
35  
36  
37  
38  
39  
40  
41  
42  
43  
44  
45  
46  
47  
48  
49  
50  
51  
52  
53  
54  
55  
56  
57  
58  
59  
60

## AUTHORS' CONTRIBUTIONS

The SWEET EU-project was initiated by JCGH, AR, and JH. The protocol for the SWEET intervention trial was written by LK, AR and YM, with contribution from EEB and JAM. AR, YM, EEB, and JAM are principal investigators (PI) at the 4 intervention sites, where LK, SSHA, SN-C, KR and TCA are investigators. EJMF, GF, CEH, TL and HM are responsible for specific methods, platforms or analyses, and MdA is responsible for monitoring of the trial. LK and AR drafted the manuscript and YM, EEB and JAM critically reviewed the manuscript. All authors read and approved the final manuscript.

## FUNDING STATEMENT

PI, AR, is also the sponsor (e-mail: [ara@nexs.ku.dk](mailto:ara@nexs.ku.dk), Phone: +45 21 30 69 12, Department of Nutrition, Exercise and Sports, University of Copenhagen, Rolighedsvej 26, 1958 Frederiksberg, Denmark). The trial is funded by the Horizon2020 program: *Sweeteners and sweetness enhancers: Impact on health, obesity, safety and sustainability* (acronym: SWEET, grant # 774293) and funding covers salary for project personal, supplies, remuneration, and dissemination of results. The amount is deposited in a project account subject to audits/public revision.

## COMPETING INTERESTS STATEMENT

AR has received honoraria from Unilever and the International Sweeteners Association. CEH's research centre provides consultancy to, and has received travel funds to present research results from organisations supported by food and drink companies. JCGH and JH have received project funds from the American Beverage Association. TL works for a company, NetUnion sarl, which has no conflict of interest in the study outcome.

## REFERENCES

- 1 World Health Organization (WHO). Noncommunicable diseases country profiles 2018. Geneva: 2018.
- 2 World Health Organization (WHO). Guideline: Sugar intake for adults and children. Geneva: 2015.
- 3 Nordic Council of Ministers. *Nordic Nutrition Recommendations 2012. Integrating nutrition and physical activity*. Norden 2014.
- 4 Technical University of Denmark (DTU) The national Food Institute. Dietary habits in Denmark 2011-2013 [Report in Danish: Danskernes kostvaner 2011-2013]. Denmark: 2015.
- 5 Institute of Preventive Medicine Environmental and Occupational Health Proplesis. National dietary guidelines for Greek adults and children. Greece: 2014.
- 6 Ruiz E, Rodriguez P, Valero T, *et al*. Dietary Intake of Individual ( Free and Intrinsic ) Sugars and Food Sources in the Spanish Population : Findings from the ANIBES Study. *Nutrients* 2017;**9**. doi:10.3390/nu9030275
- 7 Diewertje S, van Less L, Engelen AI, *et al*. Total, free, and added sugar consumption and adherence to guidelines : The Dutch National Food Consumption Survey 2007-2010. *Nutrients* 2016;**8**. doi:10.3390/nu8020070
- 8 Nettleton JE, Reimer RA, Shearer J. Reshaping the gut microbiota : Impact of low calorie sweeteners and the link to insulin resistance ? *Physiology & Behavior* 2016;**164**:488–93. doi:10.1016/j.physbeh.2016.04.029
- 9 Sylvestsky AC, Rother KI, Sciences N, *et al*. HHS Public Access. 2017;**164**:446–50. doi:10.1016/j.physbeh.2016.03.030.Trends
- 10 O'Connor D, Pang M, Castelnovo G, *et al*. A rational review on the effects of sweeteners and sweetness enhancers on appetite, food reward and metabolic/adiposity outcomes in adults. *Food and Function* 2021;**12**:442–65. doi:10.1039/d0fo02424d
- 11 Rogers PJ, Appleton KM. The effects of low-calorie sweeteners on energy intake and body weight: a systematic review and meta-analyses of sustained intervention studies. *International Journal of Obesity* 2021;**45**:464–78. doi:10.1038/s41366-020-00704-2
- 12 Toews I, Lohner S, Küllenberg De Gaudry D, *et al*. Association between intake of non-sugar sweeteners and health outcomes: Systematic review and meta-analyses of randomised and non-randomised controlled trials and observational studies. *BMJ (Online)* 2019;**364**:k4718. doi:10.1136/bmj.k4718
- 13 Anker CCB, Rafiq S, Jeppesen PB. Effect of steviol glycosides on human health with emphasis on type 2 diabetic biomarkers: A systematic review and meta-analysis of randomized controlled trials. *Nutrients* 2019;**11**:1965. doi:10.3390/nu11091965
- 14 Peters JC, Beck J, Cardel M, *et al*. The Effects of Water and Non-Nutritive Sweetened Beverages on Weight Loss and Weight Maintenance : A Randomized Clinical Trial. 2016;**24**:297–304. doi:10.1002/oby.21327
- 15 Normand M, Ritz C, Mela D, *et al*. Low-energy sweeteners and body weight: A citation network analysis. *BMJ Nutrition, Prevention and Health* 2021;**4**:319–32. doi:10.1136/bmjnph-2020-000210

- 1  
2  
3 16 Greyling A, Appleton KM, Raben A, *et al.* Acute glycemc and insulinemic effects of low-energy  
4 sweeteners: A systematic review and meta-analysis of randomized controlled trials. *American*  
5 *Journal of Clinical Nutrition* 2020;**112**:1002–14. doi:10.1093/ajcn/nqaa167  
6  
7 17 Nichol AD, Holle MJ, An R. Glycemic impact of non-nutritive sweeteners: A systematic review  
8 and meta-analysis of randomized controlled trials. *European Journal of Clinical Nutrition*  
9 2018;**72**:796–804. doi:10.1038/s41430-018-0170-6  
10  
11 18 del Pozo S, Gómez-Martínez S, Díaz LE, *et al.* Potential Effects of Sucralose and Saccharin on Gut  
12 Microbiota: A Review. *Nutrients* 2022;**14**:1682. doi:10.3390/nu14081682  
13  
14 19 Cao Y, Liu H, Qin N, *et al.* Impact of food additives on the composition and function of gut  
15 microbiota: A review. *Trends in Food Science & Technology* 2020;**99**:295–310.  
16 doi:10.1016/J.TIFS.2020.03.006  
17  
18 20 Suez J, Korem T, Zeevi D, *et al.* Artificial sweeteners induce glucose intolerance by altering the  
19 gut microbiota. *Nature* 2014;**514**:181–6. doi:10.1038/nature13793  
20  
21 21 Williamson DA, Bray GA, Ryan DH. Is 5% weight loss a satisfactory criterion to define clinically  
22 significant weight loss? *Obesity* 2015;**23**:2319–20. doi:10.1002/OBY.21358  
23  
24 22 Barlow SE, MPH and the Expert Committee. Expert Committee Recommendations Regarding the  
25 Prevention, Assessment, and Treatment of Child and Adolescent Overweight and Obesity :  
26 Summary Report. *Pediatrics* 2007;**120**:S164–92. doi:10.1542/peds.2007-2329C  
27  
28 23 Henry C. Basal metabolic rate studies in humans: measurement and development of new equations.  
29 *Public Health Nutrition* 2005;**8**:1133–52. doi:10.1079/phn2005801  
30  
31 24 European Food Safety Authority (EFSA). Nutrition and Allergies (NDA). Scientific Opinion on  
32 the substantiation of health claims related to konjac mannan (glucomannan) and reduction of body  
33 weight (ID 854, 1556, 3725), reduction of post-prandial glycaemic responses (ID 1559),  
34 maintenance of normal blood glucose concentration. *EFSA Journal* 2010;**8**.  
35 doi:10.2903/j.efsa.2010.1798  
36  
37 25 Peters JC, Wyatt HR, Foster GD, *et al.* The Effects of Water and Non-Nutritive Sweetened  
38 Beverages on Weight Loss During a 12-week Weight Loss Treatment Program. 2014;**22**:1415–21.  
39 doi:10.1002/oby.20737  
40  
41 26 World Medical Association. World Medical Association Declaration of Helsinki: ethical principles  
42 for medical research involving human subjects. *J Am Coll Dent* 2014;**81**:14–8.  
43 doi:10.1093/acprof:oso/9780199241323.003.0025  
44  
45 27 Harris PA, Taylor R, Thielke R, *et al.* Research electronic data capture (REDCap)-A metadata-  
46 driven methodology and workflow process for providing translational research informatics support.  
47 *Journal of Biomedical Informatics* 2009;**42**:377–81. doi:10.1016/j.jbi.2008.08.010  
48  
49 28 Harris PA, Taylor R, Minor BL, *et al.* The REDCap consortium: Building an international  
50 community of software platform partners. *Journal of Biomedical Informatics* 2019;**95**:103208.  
51 doi:10.1016/j.jbi.2019.103208  
52  
53  
54  
55  
56  
57  
58  
59  
60

## FIGURE LEGEND

**Figure 1:** Overall study design.

Solid lines are CIDs and dashed lines are dietary counselling sessions where non-fasting body weight of adults is measured. Additionally, LED products for adults will be collected from the intervention site every 2nd or 3rd week during the initial 2-month period.

BMI: body mass index. CID: clinical investigation day; S&SEs, sweeteners and sweetness enhancers.

For peer review only

1  
2  
3  
4  
5  
6  
7  
8  
9  
10  
11  
12  
13  
14  
15  
16  
17  
18  
19  
20  
21  
22  
23  
24  
25  
26  
27  
28  
29  
30  
31  
32  
33  
34  
35  
36  
37  
38  
39  
40  
41

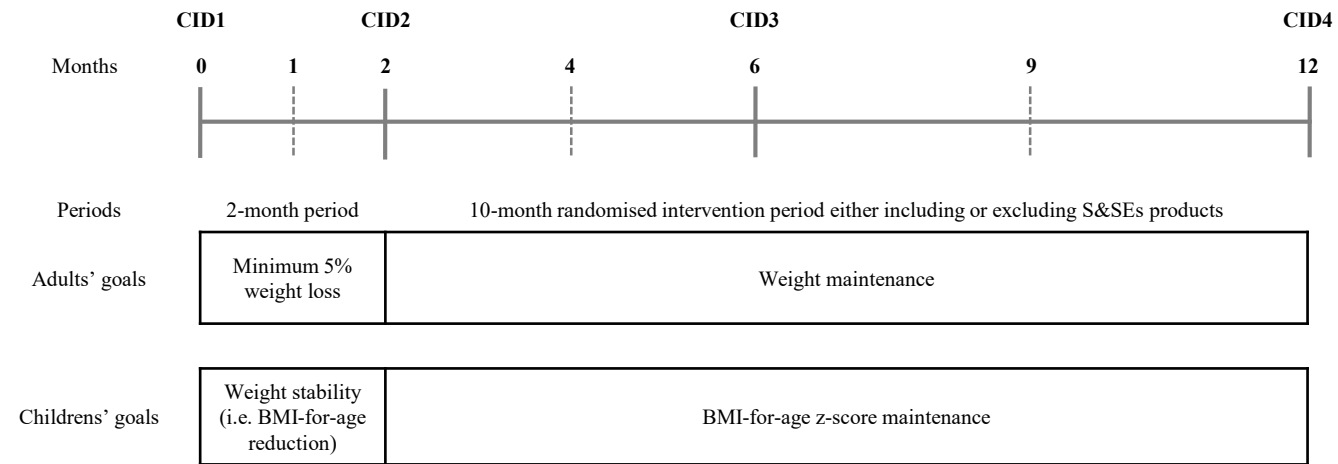

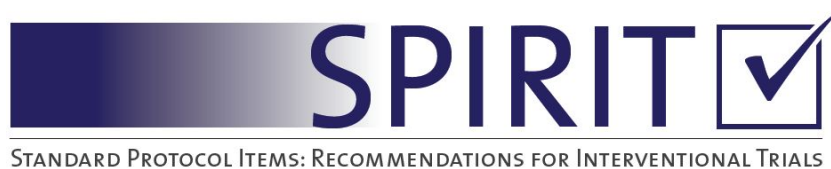

SPIRIT 2013 Checklist: Recommended items to address in a clinical trial protocol and related documents\*

| Section/item                      | Item No | Description                                                                                                                                                                                                                                                                              | Page no. |
|-----------------------------------|---------|------------------------------------------------------------------------------------------------------------------------------------------------------------------------------------------------------------------------------------------------------------------------------------------|----------|
| <b>Administrative information</b> |         |                                                                                                                                                                                                                                                                                          |          |
| Title                             | 1       | Descriptive title identifying the study design, population, interventions, and, if applicable, trial acronym                                                                                                                                                                             | 1        |
| Trial registration                | 2a      | Trial identifier and registry name. If not yet registered, name of intended registry                                                                                                                                                                                                     | 4        |
|                                   | 2b      | All items from the World Health Organization Trial Registration Data Set                                                                                                                                                                                                                 | NA       |
| Protocol version                  | 3       | Date and version identifier                                                                                                                                                                                                                                                              | 18       |
| Funding                           | 4       | Sources and types of financial, material, and other support                                                                                                                                                                                                                              | 21       |
| Roles and responsibilities        | 5a      | Names, affiliations, and roles of protocol contributors                                                                                                                                                                                                                                  | 1-2+21   |
|                                   | 5b      | Name and contact information for the trial sponsor                                                                                                                                                                                                                                       | 21       |
|                                   | 5c      | Role of study sponsor and funders, if any, in study design; collection, management, analysis, and interpretation of data; writing of the report; and the decision to submit the report for publication, including whether they will have ultimate authority over any of these activities | 21       |
|                                   | 5d      | Composition, roles, and responsibilities of the coordinating centre, steering committee, endpoint adjudication committee, data management team, and other individuals or groups overseeing the trial, if applicable (see Item 21a for data monitoring committee)                         | 21       |
| <b>Introduction</b>               |         |                                                                                                                                                                                                                                                                                          |          |
| Background and rationale          | 6a      | Description of research question and justification for undertaking the trial, including summary of relevant studies (published and unpublished) examining benefits and harms for each intervention                                                                                       | 5        |
|                                   | 6b      | Explanation for choice of comparators                                                                                                                                                                                                                                                    | 5        |
| Objectives                        | 7       | Specific objectives or hypotheses                                                                                                                                                                                                                                                        | 6        |



|    |                                                           |     |                                                                                                                                                                                                                                                                                                                                                                                |                      |
|----|-----------------------------------------------------------|-----|--------------------------------------------------------------------------------------------------------------------------------------------------------------------------------------------------------------------------------------------------------------------------------------------------------------------------------------------------------------------------------|----------------------|
| 1  |                                                           |     |                                                                                                                                                                                                                                                                                                                                                                                |                      |
| 2  | Trial design                                              | 8   | Description of trial design including type of trial (eg, parallel group, crossover, factorial, single group), allocation ratio, and framework (eg, superiority, equivalence, noninferiority, exploratory)                                                                                                                                                                      | 6-7+9                |
| 3  |                                                           |     |                                                                                                                                                                                                                                                                                                                                                                                |                      |
| 4  |                                                           |     |                                                                                                                                                                                                                                                                                                                                                                                |                      |
| 5  |                                                           |     |                                                                                                                                                                                                                                                                                                                                                                                |                      |
| 6  |                                                           |     |                                                                                                                                                                                                                                                                                                                                                                                |                      |
| 7  |                                                           |     |                                                                                                                                                                                                                                                                                                                                                                                |                      |
| 8  | <b>Methods: Participants, interventions, and outcomes</b> |     |                                                                                                                                                                                                                                                                                                                                                                                |                      |
| 9  |                                                           |     |                                                                                                                                                                                                                                                                                                                                                                                |                      |
| 10 | Study setting                                             | 9   | Description of study settings (eg, community clinic, academic hospital) and list of countries where data will be collected. Reference to where list of study sites can be obtained                                                                                                                                                                                             | 6                    |
| 11 |                                                           |     |                                                                                                                                                                                                                                                                                                                                                                                |                      |
| 12 |                                                           |     |                                                                                                                                                                                                                                                                                                                                                                                |                      |
| 13 |                                                           |     |                                                                                                                                                                                                                                                                                                                                                                                |                      |
| 14 | Eligibility criteria                                      | 10  | Inclusion and exclusion criteria for participants. If applicable, eligibility criteria for study centres and individuals who will perform the interventions (eg, surgeons, psychotherapists)                                                                                                                                                                                   | 7-8+<br>Table 1      |
| 15 |                                                           |     |                                                                                                                                                                                                                                                                                                                                                                                |                      |
| 16 |                                                           |     |                                                                                                                                                                                                                                                                                                                                                                                |                      |
| 17 |                                                           |     |                                                                                                                                                                                                                                                                                                                                                                                |                      |
| 18 |                                                           |     |                                                                                                                                                                                                                                                                                                                                                                                |                      |
| 19 | Interventions                                             | 11a | Interventions for each group with sufficient detail to allow replication, including how and when they will be administered                                                                                                                                                                                                                                                     | 9-11 +<br>Table 2+3  |
| 20 |                                                           |     |                                                                                                                                                                                                                                                                                                                                                                                |                      |
| 21 |                                                           |     |                                                                                                                                                                                                                                                                                                                                                                                |                      |
| 22 |                                                           | 11b | Criteria for discontinuing or modifying allocated interventions for a given trial participant (eg, drug dose change in response to harms, participant request, or improving/worsening disease)                                                                                                                                                                                 | 8                    |
| 23 |                                                           |     |                                                                                                                                                                                                                                                                                                                                                                                |                      |
| 24 |                                                           |     |                                                                                                                                                                                                                                                                                                                                                                                |                      |
| 25 |                                                           |     |                                                                                                                                                                                                                                                                                                                                                                                |                      |
| 26 |                                                           | 11c | Strategies to improve adherence to intervention protocols, and any procedures for monitoring adherence (eg, drug tablet return, laboratory tests)                                                                                                                                                                                                                              | 12                   |
| 27 |                                                           |     |                                                                                                                                                                                                                                                                                                                                                                                |                      |
| 28 |                                                           |     |                                                                                                                                                                                                                                                                                                                                                                                |                      |
| 29 |                                                           |     |                                                                                                                                                                                                                                                                                                                                                                                |                      |
| 30 |                                                           |     |                                                                                                                                                                                                                                                                                                                                                                                |                      |
| 31 |                                                           | 11d | Relevant concomitant care and interventions that are permitted or prohibited during the trial                                                                                                                                                                                                                                                                                  | Table 1              |
| 32 |                                                           |     |                                                                                                                                                                                                                                                                                                                                                                                |                      |
| 33 |                                                           |     |                                                                                                                                                                                                                                                                                                                                                                                |                      |
| 34 | Outcomes                                                  | 12  | Primary, secondary, and other outcomes, including the specific measurement variable (eg, systolic blood pressure), analysis metric (eg, change from baseline, final value, time to event), method of aggregation (eg, median, proportion), and time point for each outcome. Explanation of the clinical relevance of chosen efficacy and harm outcomes is strongly recommended | 14-17                |
| 35 |                                                           |     |                                                                                                                                                                                                                                                                                                                                                                                |                      |
| 36 |                                                           |     |                                                                                                                                                                                                                                                                                                                                                                                |                      |
| 37 |                                                           |     |                                                                                                                                                                                                                                                                                                                                                                                |                      |
| 38 |                                                           |     |                                                                                                                                                                                                                                                                                                                                                                                |                      |
| 39 |                                                           |     |                                                                                                                                                                                                                                                                                                                                                                                |                      |
| 40 |                                                           |     |                                                                                                                                                                                                                                                                                                                                                                                |                      |
| 41 |                                                           |     |                                                                                                                                                                                                                                                                                                                                                                                |                      |
| 42 | Participant timeline                                      | 13  | Time schedule of enrolment, interventions (including any run-ins and washouts), assessments, and visits for participants. A schematic diagram is highly recommended (see Figure)                                                                                                                                                                                               | Figure 1<br>+Table 4 |
| 43 |                                                           |     |                                                                                                                                                                                                                                                                                                                                                                                |                      |
| 44 |                                                           |     |                                                                                                                                                                                                                                                                                                                                                                                |                      |
| 45 |                                                           |     |                                                                                                                                                                                                                                                                                                                                                                                |                      |
| 46 |                                                           |     |                                                                                                                                                                                                                                                                                                                                                                                |                      |
| 47 | Sample size                                               | 14  | Estimated number of participants needed to achieve study objectives and how it was determined, including clinical and statistical assumptions supporting any sample size calculations                                                                                                                                                                                          | 17                   |
| 48 |                                                           |     |                                                                                                                                                                                                                                                                                                                                                                                |                      |
| 49 |                                                           |     |                                                                                                                                                                                                                                                                                                                                                                                |                      |
| 50 |                                                           |     |                                                                                                                                                                                                                                                                                                                                                                                |                      |
| 51 | Recruitment                                               | 15  | Strategies for achieving adequate participant enrolment to reach target sample size                                                                                                                                                                                                                                                                                            | 7-8                  |
| 52 |                                                           |     |                                                                                                                                                                                                                                                                                                                                                                                |                      |
| 53 |                                                           |     |                                                                                                                                                                                                                                                                                                                                                                                |                      |

#### Methods: Assignment of interventions (for controlled trials)

##### Allocation:

|    |                                                           |     |                                                                          |       |
|----|-----------------------------------------------------------|-----|--------------------------------------------------------------------------|-------|
| 1  |                                                           |     |                                                                          |       |
| 2  | Sequence                                                  | 16a | Method of generating the allocation sequence (eg, computer-              |       |
| 3  | generation                                                |     | generated random numbers), and list of any factors for stratification.   |       |
| 4  |                                                           |     | To reduce predictability of a random sequence, details of any            |       |
| 5  |                                                           |     | planned restriction (eg, blocking) should be provided in a separate      | 9     |
| 6  |                                                           |     | document that is unavailable to those who enrol participants or          |       |
| 7  |                                                           |     | assign interventions                                                     |       |
| 8  |                                                           |     |                                                                          |       |
| 9  |                                                           |     |                                                                          |       |
| 10 | Allocation                                                | 16b | Mechanism of implementing the allocation sequence (eg, central           |       |
| 11 | concealment                                               |     | telephone; sequentially numbered, opaque, sealed envelopes),             |       |
| 12 | mechanism                                                 |     | describing any steps to conceal the sequence until interventions are     | 9     |
| 13 |                                                           |     | assigned                                                                 |       |
| 14 |                                                           |     |                                                                          |       |
| 15 | Implementation                                            | 16c | Who will generate the allocation sequence, who will enrol                |       |
| 16 |                                                           |     | participants, and who will assign participants to interventions          | 9     |
| 17 |                                                           |     |                                                                          |       |
| 18 |                                                           |     |                                                                          |       |
| 19 | Blinding                                                  | 17a | Who will be blinded after assignment to interventions (eg, trial         |       |
| 20 | (masking)                                                 |     | participants, care providers, outcome assessors, data analysts), and     | 11    |
| 21 |                                                           |     | how                                                                      |       |
| 22 |                                                           |     |                                                                          |       |
| 23 |                                                           | 17b | If blinded, circumstances under which unblinding is permissible, and     |       |
| 24 |                                                           |     | procedure for revealing a participant's allocated intervention during    | 9     |
| 25 |                                                           |     | the trial                                                                |       |
| 26 |                                                           |     |                                                                          |       |
| 27 |                                                           |     |                                                                          |       |
| 28 | <b>Methods: Data collection, management, and analysis</b> |     |                                                                          |       |
| 29 |                                                           |     |                                                                          |       |
| 30 | Data collection                                           | 18a | Plans for assessment and collection of outcome, baseline, and other      |       |
| 31 | methods                                                   |     | trial data, including any related processes to promote data quality      |       |
| 32 |                                                           |     | (eg, duplicate measurements, training of assessors) and a                | 12    |
| 33 |                                                           |     | description of study instruments (eg, questionnaires, laboratory         |       |
| 34 |                                                           |     | tests) along with their reliability and validity, if known. Reference to |       |
| 35 |                                                           |     | where data collection forms can be found, if not in the protocol         |       |
| 36 |                                                           |     |                                                                          |       |
| 37 |                                                           |     |                                                                          |       |
| 38 |                                                           | 18b | Plans to promote participant retention and complete follow-up,           |       |
| 39 |                                                           |     | including list of any outcome data to be collected for participants      | 17    |
| 40 |                                                           |     | who discontinue or deviate from intervention protocols                   |       |
| 41 |                                                           |     |                                                                          |       |
| 42 | Data                                                      | 19  | Plans for data entry, coding, security, and storage, including any       |       |
| 43 | management                                                |     | related processes to promote data quality (eg, double data entry;        |       |
| 44 |                                                           |     | range checks for data values). Reference to where details of data        | 20    |
| 45 |                                                           |     | management procedures can be found, if not in the protocol               |       |
| 46 |                                                           |     |                                                                          |       |
| 47 |                                                           |     |                                                                          |       |
| 48 | Statistical                                               | 20a | Statistical methods for analysing primary and secondary outcomes.        |       |
| 49 | methods                                                   |     | Reference to where other details of the statistical analysis plan can    | 17-18 |
| 50 |                                                           |     | be found, if not in the protocol                                         |       |
| 51 |                                                           |     |                                                                          |       |
| 52 |                                                           | 20b | Methods for any additional analyses (eg, subgroup and adjusted           |       |
| 53 |                                                           |     | analyses)                                                                | 17-18 |
| 54 |                                                           |     |                                                                          |       |
| 55 |                                                           | 20c | Definition of analysis population relating to protocol non-adherence     |       |
| 56 |                                                           |     | (eg, as randomised analysis), and any statistical methods to handle      | 18    |
| 57 |                                                           |     | missing data (eg, multiple imputation)                                   |       |
| 58 |                                                           |     |                                                                          |       |
| 59 |                                                           |     |                                                                          |       |
| 60 |                                                           |     |                                                                          |       |

1  
2 **Methods: Monitoring**

|    |                 |     |                                                                                                                                                                                                                                                                                                                                       |    |
|----|-----------------|-----|---------------------------------------------------------------------------------------------------------------------------------------------------------------------------------------------------------------------------------------------------------------------------------------------------------------------------------------|----|
| 3  |                 |     |                                                                                                                                                                                                                                                                                                                                       |    |
| 4  | Data monitoring | 21a | Composition of data monitoring committee (DMC); summary of its role and reporting structure; statement of whether it is independent from the sponsor and competing interests; and reference to where further details about its charter can be found, if not in the protocol. Alternatively, an explanation of why a DMC is not needed | 20 |
| 5  |                 |     |                                                                                                                                                                                                                                                                                                                                       |    |
| 6  |                 |     |                                                                                                                                                                                                                                                                                                                                       |    |
| 7  |                 |     |                                                                                                                                                                                                                                                                                                                                       |    |
| 8  |                 |     |                                                                                                                                                                                                                                                                                                                                       |    |
| 9  |                 |     |                                                                                                                                                                                                                                                                                                                                       |    |
| 10 |                 |     |                                                                                                                                                                                                                                                                                                                                       |    |
| 11 |                 | 21b | Description of any interim analyses and stopping guidelines, including who will have access to these interim results and make the final decision to terminate the trial                                                                                                                                                               | NR |
| 12 |                 |     |                                                                                                                                                                                                                                                                                                                                       |    |
| 13 |                 |     |                                                                                                                                                                                                                                                                                                                                       |    |
| 14 |                 |     |                                                                                                                                                                                                                                                                                                                                       |    |
| 15 | Harms           | 22  | Plans for collecting, assessing, reporting, and managing solicited and spontaneously reported adverse events and other unintended effects of trial interventions or trial conduct                                                                                                                                                     | 16 |
| 16 |                 |     |                                                                                                                                                                                                                                                                                                                                       |    |
| 17 |                 |     |                                                                                                                                                                                                                                                                                                                                       |    |
| 18 |                 |     |                                                                                                                                                                                                                                                                                                                                       |    |
| 19 |                 |     |                                                                                                                                                                                                                                                                                                                                       |    |
| 20 | Auditing        | 23  | Frequency and procedures for auditing trial conduct, if any, and whether the process will be independent from investigators and the sponsor                                                                                                                                                                                           | NR |
| 21 |                 |     |                                                                                                                                                                                                                                                                                                                                       |    |
| 22 |                 |     |                                                                                                                                                                                                                                                                                                                                       |    |
| 23 |                 |     |                                                                                                                                                                                                                                                                                                                                       |    |

24 **Ethics and dissemination**

|    |                               |     |                                                                                                                                                                                                                                  |       |
|----|-------------------------------|-----|----------------------------------------------------------------------------------------------------------------------------------------------------------------------------------------------------------------------------------|-------|
| 25 |                               |     |                                                                                                                                                                                                                                  |       |
| 26 | Research ethics approval      | 24  | Plans for seeking research ethics committee/institutional review board (REC/IRB) approval                                                                                                                                        | 3     |
| 27 |                               |     |                                                                                                                                                                                                                                  |       |
| 28 |                               |     |                                                                                                                                                                                                                                  |       |
| 29 | Protocol amendments           | 25  | Plans for communicating important protocol modifications (eg, changes to eligibility criteria, outcomes, analyses) to relevant parties (eg, investigators, REC/IRBs, trial participants, trial registries, journals, regulators) | 18    |
| 30 |                               |     |                                                                                                                                                                                                                                  |       |
| 31 |                               |     |                                                                                                                                                                                                                                  |       |
| 32 |                               |     |                                                                                                                                                                                                                                  |       |
| 33 |                               |     |                                                                                                                                                                                                                                  |       |
| 34 |                               |     |                                                                                                                                                                                                                                  |       |
| 35 | Consent or assent             | 26a | Who will obtain informed consent or assent from potential trial participants or authorised surrogates, and how (see Item 32)                                                                                                     | 7     |
| 36 |                               |     |                                                                                                                                                                                                                                  |       |
| 37 |                               |     |                                                                                                                                                                                                                                  |       |
| 38 |                               |     |                                                                                                                                                                                                                                  |       |
| 39 |                               | 26b | Additional consent provisions for collection and use of participant data and biological specimens in ancillary studies, if applicable                                                                                            | NR    |
| 40 |                               |     |                                                                                                                                                                                                                                  |       |
| 41 |                               |     |                                                                                                                                                                                                                                  |       |
| 42 | Confidentiality               | 27  | How personal information about potential and enrolled participants will be collected, shared, and maintained in order to protect confidentiality before, during, and after the trial                                             | 19-20 |
| 43 |                               |     |                                                                                                                                                                                                                                  |       |
| 44 |                               |     |                                                                                                                                                                                                                                  |       |
| 45 |                               |     |                                                                                                                                                                                                                                  |       |
| 46 | Declaration of interests      | 28  | Financial and other competing interests for principal investigators for the overall trial and each study site                                                                                                                    | 23    |
| 47 |                               |     |                                                                                                                                                                                                                                  |       |
| 48 |                               |     |                                                                                                                                                                                                                                  |       |
| 49 | Access to data                | 29  | Statement of who will have access to the final trial dataset, and disclosure of contractual agreements that limit such access for investigators                                                                                  | 20    |
| 50 |                               |     |                                                                                                                                                                                                                                  |       |
| 51 |                               |     |                                                                                                                                                                                                                                  |       |
| 52 |                               |     |                                                                                                                                                                                                                                  |       |
| 53 |                               |     |                                                                                                                                                                                                                                  |       |
| 54 | Ancillary and post-trial care | 30  | Provisions, if any, for ancillary and post-trial care, and for compensation to those who suffer harm from trial participation                                                                                                    | 18-19 |
| 55 |                               |     |                                                                                                                                                                                                                                  |       |
| 56 |                               |     |                                                                                                                                                                                                                                  |       |
| 57 |                               |     |                                                                                                                                                                                                                                  |       |
| 58 |                               |     |                                                                                                                                                                                                                                  |       |
| 59 |                               |     |                                                                                                                                                                                                                                  |       |
| 60 |                               |     |                                                                                                                                                                                                                                  |       |

|    |                               |     |                                                                                                                                                                                                                                                                                     |                                                         |
|----|-------------------------------|-----|-------------------------------------------------------------------------------------------------------------------------------------------------------------------------------------------------------------------------------------------------------------------------------------|---------------------------------------------------------|
| 1  |                               |     |                                                                                                                                                                                                                                                                                     |                                                         |
| 2  | Dissemination<br>policy       | 31a | Plans for investigators and sponsor to communicate trial results to participants, healthcare professionals, the public, and other relevant groups (eg, via publication, reporting in results databases, or other data sharing arrangements), including any publication restrictions | 4+20                                                    |
| 3  |                               |     |                                                                                                                                                                                                                                                                                     |                                                         |
| 4  |                               |     |                                                                                                                                                                                                                                                                                     |                                                         |
| 5  |                               |     |                                                                                                                                                                                                                                                                                     |                                                         |
| 6  |                               |     |                                                                                                                                                                                                                                                                                     |                                                         |
| 7  |                               | 31b | Authorship eligibility guidelines and any intended use of professional writers                                                                                                                                                                                                      | NR                                                      |
| 8  |                               |     |                                                                                                                                                                                                                                                                                     |                                                         |
| 9  |                               |     |                                                                                                                                                                                                                                                                                     |                                                         |
| 10 |                               | 31c | Plans, if any, for granting public access to the full protocol, participant-level dataset, and statistical code                                                                                                                                                                     | 20                                                      |
| 11 |                               |     |                                                                                                                                                                                                                                                                                     |                                                         |
| 12 |                               |     |                                                                                                                                                                                                                                                                                     |                                                         |
| 13 |                               |     |                                                                                                                                                                                                                                                                                     |                                                         |
| 14 | <b>Appendices</b>             |     |                                                                                                                                                                                                                                                                                     |                                                         |
| 15 |                               |     |                                                                                                                                                                                                                                                                                     |                                                         |
| 16 | Informed consent<br>materials | 32  | Model consent form and other related documentation given to participants and authorised surrogates                                                                                                                                                                                  | The master<br>version can<br>be delivered<br>by request |
| 17 |                               |     |                                                                                                                                                                                                                                                                                     |                                                         |
| 18 |                               |     |                                                                                                                                                                                                                                                                                     |                                                         |
| 19 |                               |     |                                                                                                                                                                                                                                                                                     |                                                         |
| 20 |                               |     |                                                                                                                                                                                                                                                                                     |                                                         |
| 21 |                               |     |                                                                                                                                                                                                                                                                                     |                                                         |
| 22 | Biological<br>specimens       | 33  | Plans for collection, laboratory evaluation, and storage of biological specimens for genetic or molecular analysis in the current trial and for future use in ancillary studies, if applicable                                                                                      | NR                                                      |
| 23 |                               |     |                                                                                                                                                                                                                                                                                     |                                                         |
| 24 |                               |     |                                                                                                                                                                                                                                                                                     |                                                         |
| 25 |                               |     |                                                                                                                                                                                                                                                                                     |                                                         |

---

\*It is strongly recommended that this checklist be read in conjunction with the SPIRIT 2013 Explanation & Elaboration for important clarification on the items. Amendments to the protocol should be tracked and dated. The SPIRIT checklist is copyrighted by the SPIRIT Group under the Creative Commons "[Attribution-NonCommercial-NoDerivs 3.0 Unported](https://creativecommons.org/licenses/by-nc-nd/3.0/)" license.

# BMJ Open

**Protocol for a multicentre, parallel, randomised, controlled, trial on the effect of sweeteners and sweetness enhancers on health, obesity and safety in overweight adults and children. The SWEET project.**

|                                 |                                                                                                                                                                                                                                                                                                                                                                                                                                                                                                                                                                                                                                                                                                                                                                                                                                                                                                                                                                                                                                                                                                                                                                                                                                                                                                                                                                                                                                                                                                                                                                                                                                                                                                                                          |
|---------------------------------|------------------------------------------------------------------------------------------------------------------------------------------------------------------------------------------------------------------------------------------------------------------------------------------------------------------------------------------------------------------------------------------------------------------------------------------------------------------------------------------------------------------------------------------------------------------------------------------------------------------------------------------------------------------------------------------------------------------------------------------------------------------------------------------------------------------------------------------------------------------------------------------------------------------------------------------------------------------------------------------------------------------------------------------------------------------------------------------------------------------------------------------------------------------------------------------------------------------------------------------------------------------------------------------------------------------------------------------------------------------------------------------------------------------------------------------------------------------------------------------------------------------------------------------------------------------------------------------------------------------------------------------------------------------------------------------------------------------------------------------|
| Journal:                        | <i>BMJ Open</i>                                                                                                                                                                                                                                                                                                                                                                                                                                                                                                                                                                                                                                                                                                                                                                                                                                                                                                                                                                                                                                                                                                                                                                                                                                                                                                                                                                                                                                                                                                                                                                                                                                                                                                                          |
| Manuscript ID                   | bmjopen-2022-061075.R2                                                                                                                                                                                                                                                                                                                                                                                                                                                                                                                                                                                                                                                                                                                                                                                                                                                                                                                                                                                                                                                                                                                                                                                                                                                                                                                                                                                                                                                                                                                                                                                                                                                                                                                   |
| Article Type:                   | Protocol                                                                                                                                                                                                                                                                                                                                                                                                                                                                                                                                                                                                                                                                                                                                                                                                                                                                                                                                                                                                                                                                                                                                                                                                                                                                                                                                                                                                                                                                                                                                                                                                                                                                                                                                 |
| Date Submitted by the Author:   | 25-Aug-2022                                                                                                                                                                                                                                                                                                                                                                                                                                                                                                                                                                                                                                                                                                                                                                                                                                                                                                                                                                                                                                                                                                                                                                                                                                                                                                                                                                                                                                                                                                                                                                                                                                                                                                                              |
| Complete List of Authors:       | <p>Kjølbæk, Louise; University of Copenhagen, Department of Nutrition, Exercise and Sports<br/> Manios, Yannis; Harokopio University of Athens, Department of Nutrition and Dietetics; Hellenic Mediterranean University Research Centre, Institute of Agri-food and Life Sciences<br/> Blaak, Ellen; Maastricht University, Department of Human Biology<br/> Martínez, Jose; University of Navarra, Center for Nutrition Research; IMDEA Food Institute<br/> Feskens, Edith; Wageningen University, Division of Human Nutrition and Health<br/> Finlayson, G; University of Leeds, School of Psychology<br/> Andersen, Sabina ; University of Copenhagen, Department of Nutrition, Exercise and Sports<br/> Reppas, Kyriakos; Harokopio University of Athens, Department of Nutrition and Dietetics<br/> Navas-Carretero, Santiago; University of Navarra, Center for Nutrition Research; Instituto de Salud Carlos III, CIBER Fisiopatología Obesidad y Nutrición (CIBERObn)<br/> Adam, Tanja; Maastricht University, Department of Nutrition &amp; Movement Sciences<br/> Hodgkins, Charo ; University of Surrey, Food, Consumer Behaviour and Health Research Centre<br/> del Álamo, Marta; European Clinical Research Infrastructure Network<br/> Lam, Tony; NetUnion sarl<br/> Moshoyiannis, Hariklia; Bioiatriki S.A., International Reference Laboratory Services<br/> Halford, Jason; University of Leeds, School of Psychology; University of Liverpool, Department of Psychology<br/> Harrold, Joanne; University of Liverpool, Department of Psychology<br/> Raben, Anne; University of Copenhagen, Nutrition, Exercise and Sports; Copenhagen University Hospital - Steno Diabetes Center Copenhagen, Clinical Research</p> |
| <b>Primary Subject Heading</b>: | Nutrition and metabolism                                                                                                                                                                                                                                                                                                                                                                                                                                                                                                                                                                                                                                                                                                                                                                                                                                                                                                                                                                                                                                                                                                                                                                                                                                                                                                                                                                                                                                                                                                                                                                                                                                                                                                                 |
| Secondary Subject Heading:      | Evidence based practice, Diabetes and endocrinology, Public health                                                                                                                                                                                                                                                                                                                                                                                                                                                                                                                                                                                                                                                                                                                                                                                                                                                                                                                                                                                                                                                                                                                                                                                                                                                                                                                                                                                                                                                                                                                                                                                                                                                                       |

1  
2  
3  
4  
5  
6  
7  
8  
9  
10  
11  
12  
13  
14  
15  
16  
17  
18  
19  
20  
21  
22  
23  
24  
25  
26  
27  
28  
29  
30  
31  
32  
33  
34  
35  
36  
37  
38  
39  
40  
41  
42  
43  
44  
45  
46  
47  
48  
49  
50  
51  
52  
53  
54  
55  
56  
57  
58  
59  
60

|           |                                                                                                                                                      |
|-----------|------------------------------------------------------------------------------------------------------------------------------------------------------|
| Keywords: | Nutrition < TROPICAL MEDICINE, DIABETES & ENDOCRINOLOGY,<br>Microbiology < NATURAL SCIENCE DISCIPLINES, MICROBIOLOGY,<br>Allergy < THORACIC MEDICINE |
|           |                                                                                                                                                      |

SCHOLARONE™  
Manuscripts

1  
2  
3  
4  
5  
6  
7  
8  
9  
10  
11  
12  
13  
14  
15  
16  
17  
18  
19  
20  
21  
22  
23  
24  
25  
26  
27  
28  
29  
30  
31  
32  
33  
34  
35  
36  
37  
38  
39  
40  
41  
42  
43  
44  
45  
46  
47  
48  
49  
50  
51  
52  
53  
54  
55  
56  
57  
58  
59  
60

# Protocol for a multicentre, parallel, randomised, controlled, trial on the effect of sweeteners and sweetness enhancers on health, obesity and safety in overweight adults and children. The SWEET project.

Authors: Louise Kjølbæk<sup>1</sup>, Yannis Manios<sup>2,3</sup>, Ellen E Blaak<sup>4</sup>, J Alfredo Martinez<sup>5,6,7</sup>, Edith J M Feskens<sup>8</sup>, Graham Finlayson<sup>9</sup>, Sabina Stoffer Hjorth Andersen<sup>1</sup>, Kyriakos Reppas<sup>2</sup>, Santiago Navas-Carretero<sup>5,7,10</sup>, Tanja C Adams<sup>11</sup>, Charo E Hodgkins<sup>12</sup>, Marta del Álamo<sup>13</sup>, Tony Lam<sup>14</sup>, Hariklia Moshoyiannis<sup>15</sup>, Jason C G Halford<sup>9,16</sup>, Joanne Harrold<sup>16</sup>, Anne Raben<sup>1,17</sup>

<sup>1</sup>Department of Nutrition, Exercise and Sports, University of Copenhagen, Frederiksberg C, Denmark, <sup>2</sup>Department of Nutrition and Dietetics, Harokopio University of Athens, Kallithea Athens, Greece, <sup>3</sup>Institute of Agri-food and Life Sciences, Hellenic Mediterranean University Research Centre, Heraklion, Greece, <sup>4</sup>Department of Human Biology, Maastricht University, Maastricht, the Netherlands, <sup>5</sup>Center for Nutrition Research, University of Navarra, Pamplona, Spain, <sup>6</sup>IMDEA Food Institute, Madrid, Spain, <sup>7</sup>Centro de investigación Biomédica en Red, fisiopatología de la obesidad y Nutrición, Instituto de Salud Carlos III, Madrid, Spain, <sup>8</sup>Division of Human Nutrition and Health, Wageningen University, Wageningen, the Netherlands, <sup>9</sup>School of Psychology, University of Leeds, Leeds, United Kingdom, <sup>10</sup>Navarra Institute for Health Research, Pamplona, Spain, <sup>11</sup>Department of Nutrition & Movement Sciences, Maastricht University, Maastricht, the Netherlands, <sup>12</sup>Food, Consumer Behaviour and Health Research Centre, School of Psychology, University of Surrey, Guildford, United Kingdom, <sup>13</sup>European Clinical Research Infrastructure Network, Paris, France, <sup>14</sup>NetUnion sarl, Lausanne, Switzerland, <sup>15</sup>International Reference Laboratory Services, Bioiatriki S.A., Athens, Greece, <sup>16</sup>Department of Psychology, The University of Liverpool, Liverpool, United Kingdom, <sup>17</sup>Clinical Research, Copenhagen University Hospital - Steno Diabetes Center Copenhagen, Herlev, Denmark.

1 Corresponding author: Louise Kjølbæk, Rolighedsvej 26, 1958 Frederiksberg C, Denmark, +45  
2  
3 3533 1462, FAX NO: +45 3532 1600, [louisekjoelbaek@nexs.ku.dk](mailto:louisekjoelbaek@nexs.ku.dk)  
4

5  
6 Word count: 4572  
7

8  
9  
10 Keywords: sugar, body weight, gut microbiota, weight loss, weight maintenance, weight loss  
11  
12 maintenance, obesity, anthropometry, type 2 diabetes, cardiovascular diseases, allergenicity.  
13  
14  
15  
16  
17  
18  
19  
20  
21  
22  
23  
24  
25  
26  
27  
28  
29  
30  
31  
32  
33  
34  
35  
36  
37  
38  
39  
40  
41  
42  
43  
44  
45  
46  
47  
48  
49  
50  
51  
52  
53  
54  
55  
56  
57  
58  
59  
60



## ABSTRACT

### Introduction

The aim of this randomised controlled trial (RCT) is to investigate if prolonged consumption of sweeteners and sweetness enhancers (S&SEs) within a healthy diet will improve weight loss maintenance and obesity related risk factors, and affect safety markers compared to sugar.

### Methods and analysis

SWEET (Sweeteners and sweetness enhancers: Prolonged effects on health, obesity and safety) is a 1-year multicentre RCT including at least 330 adults with overweight (18-65 years, body mass index (BMI) $>25$  kg/m<sup>2</sup>) and 40 children (6-12 years, BMI-for-age $>85^{\text{th}}$  percentile). In an initial 2-month period, adults will consume a low-energy diet with the aim to achieve  $\geq 5\%$  weight loss. Children are advised to consume a generally healthy diet to maintain body weight, thus reducing their BMI-for-age z-score. In the following 10 months, participants will be randomised to follow a healthy *ad libitum* diet with or without S&SE products. Clinical investigations are scheduled at baseline, after 2, 6, and 12 months. The primary outcomes are body weight for efficacy and gut microbiota composition (in relation to metabolic health) for safety, both in adults. Secondary outcomes include anthropometry, risk markers for type-2-diabetes and cardiovascular diseases, questionnaires including e.g. food preferences, craving and appetite, and tests for allergenicity.

### Ethics and dissemination

The trial protocol has been approved by the following national ethical committees; The research ethics committees of the capital region (Denmark), approval code: H-19040679, The medical ethics committee of the University Hospital Maastricht and Maastricht University (the Netherlands), approval code: NL70977.068.19/METC19-056s, Research Ethics Committee of the University of Navarra (Spain), approval code: 2019.146 mod1, Research Ethics Committee of Harokopio University (Greece), approval code: 1810/18-06-2019. The trial will be conducted in accordance with the Declaration of Helsinki. Results will be published in international peer-

1 reviewed scientific journals regardless of whether the findings are positive, negative, or  
2  
3 inconclusive.  
4  
5

6 **Trial registration number:** NCT04226911.  
7  
8  
9

### 10 **Strengths and limitations of this trial**

11

- 12 • The trial investigates long-term effects of S&SEs compared to sugar in the contexts of an *ad*  
13 *libitum* healthy diet including both foods and drinks.  
14
- 15 • Weight maintenance after weight loss is difficult to achieve and in this trial the effects of  
16 consuming S&SE foods and drinks compared to sugar during 10-month weight maintenance  
17 after 2-month weight loss are investigated.  
18
- 19 • A broad range of measurements related to health and safety, appetite and food preferences  
20 are included to address concerns raised in relation to consumption of S&SEs.  
21
- 22 • This is a multicentre trial covering Northern, Central and Southern Europe, thereby reflecting  
23 different geographic distributions of adult and childhood obesity in Europe.  
24
- 25 • A potential limitation is that the number of included children was reduced through the  
26 recruitment period, but this will not affect the 2 primary outcomes as sample size  
27 determination was done exclusively for adults.  
28  
29  
30  
31  
32  
33  
34  
35  
36  
37  
38  
39  
40  
41  
42  
43  
44  
45  
46  
47  
48  
49  
50  
51  
52  
53  
54  
55  
56  
57  
58  
59  
60

## INTRODUCTION

Obesity is a major global health problem giving rise to increased risk of non-communicable diseases such as type-2-diabetes (T2D) and cardiovascular diseases (CVD).[1] Sustaining energy balance is critical to maintain body weight. However, sugar contributes to the energy density of most diets and may therefore promote a positive energy balance.[2] In 2015, the World Health Organization (WHO) strongly recommended that free sugar intake should be <10 energy percentage (E%) and preferably <5 E% as a conditional recommendation.[2] The latter is still not fulfilled by large parts of the population, including Denmark,[3,4] Greece,[5] Spain,[6] and the Netherlands.[7]

One often-recommended approach to reduce sugar intake is to replace sugar with sweeteners or sweetness enhancers (S&SEs). The use of S&SEs allows products to retain their palatability without the associated calories, creating a perception of a 'healthier' product.[8] Although drinks often constitute the largest part of S&SEs products consumed, S&SEs products also include foods. In the US and worldwide, the consumption of S&SEs products such as desserts, gums and breakfast foods has increased.[9] However, foods with S&SEs have been less extensively investigated. S&SEs comprise a variety of compounds with proposed negative effects on health parameters,[10] however evidence is conflicting. For example, S&SEs have been claimed to result in detrimental effects on appetite, body weight, glucose metabolism, and gut microbiota.[8] In contrast, several systematic reviews and meta-analysis found no detrimental effects on appetite and body weight – rather on the contrary[11–13] and interestingly, a large 1-year study found S&SEs to be superior to water for weight loss and weight maintenance.[14] Not all reviews have come to the same conclusion, but selective citation of the different studies could be the cause.[15] In relation to postprandial glycemia and insulinemia no differences were observed between S&SEs and controls in recent systematic reviews and meta-analysis.[16,17] Following consumption of S&SEs changes in the gut microbiota composition and functionality have been debated as a food safety issue, because some changes in specific bacteria have been associated with diseases and risk markers of diseases.[18,19] As an example, a change in microbial

1 composition after 7 days consumption of saccharin has been associated with impaired glucose  
2 homeostasis.[20] However, that study included only 7 human participants, there was no control  
3 group, and conclusions were based on a post-hoc division of responders and non-responders.[20]  
4  
5  
6  
7  
8 In general, safety concerns have derived from animal studies using S&SE doses far above  
9  
10 habitual intake in humans. Long-term controlled human intervention studies are therefore  
11  
12 warranted.[19]  
13  
14

## 15 **Aim and objectives**

16  
17 The overall aim of the randomised controlled trial (RCT) SWEET (Sweeteners and sweetness  
18 enhancers: Prolonged effects on health, obesity and safety) is to investigate the efficacy and  
19  
20 safety of combined (foods and drinks) and prolonged use of S&SEs - as part of a whole healthy  
21  
22 *ad libitum* diet approach - in a population of overweight adults and children. The 2 primary  
23  
24 outcomes on efficacy and safety will be assessed in adults by 1-year changes in body weight and  
25  
26 1-year changes in gut microbiota related to metabolic health outcomes, respectively. Secondary  
27  
28 objectives concern effects on obesity-related risk factors such as fat mass, glucose metabolism,  
29  
30 and lipidemia, as well as safety aspects such as allergenicity. Other outcomes include appetite  
31  
32 sensations, food cravings, food preferences, and preference for sweet taste.  
33  
34  
35  
36  
37  
38  
39

## 40 **Hypothesis**

41  
42 We hypothesize that prolonged use of S&SEs in foods and drinks will increase palatability of the  
43  
44 diet and thereby increase compliance to the recommendations for a healthy sugar-reduced diet  
45  
46 resulting in improved body weight control. Further, we hypothesize that there will be no safety  
47  
48 concerns using S&SEs in the long-term.  
49  
50  
51  
52

## 53 **METHODS AND ANALYSIS**

### 54 **Study design**

55  
56 SWEET is conducted in 4 intervention sites; Athens, (Harokopio University of Athens, Greece),  
57  
58 Copenhagen, (University of Copenhagen, Denmark), Maastricht, (Maastricht University, the  
59  
60

1 Netherlands), and Navarra (University of Navarra, Spain) covering North, Central, South and  
2  
3 East Europe, thereby reflecting different geographic distributions of obesity in Europe. In the 1-  
4  
5 year RCT both adults and families (at least 1 adult and 1 child) are included. The RCT consists  
6  
7 of an initial 2-month period followed by a 10-month randomised 2-armed parallel intervention  
8  
9 period. For adults, the goals in these periods are first to achieve a weight loss (WL) and second  
10  
11 to maintain the WL. For children, the goals are first to achieve weight stability and second to  
12  
13 maintain BMI-for-age z-score. The 10-month randomised intervention period will be carried out  
14  
15 by using a “fading visit” approach (Figure 1). During the RCT, all participants will undergo 4  
16  
17 clinical investigation days (CIDs) and will be supervised by dieticians individually/familywise  
18  
19 and/or in groups at least every 3<sup>rd</sup> month.  
20  
21  
22  
23

24 Originally, a 1-year follow up period was planned after the 10-month intervention period;  
25  
26 however, it was omitted due to recruitment delay caused by the Covid-19 pandemic.  
27  
28 Furthermore, the initial plan was to include at least 1 child per adult (i.e. only families).  
29  
30 However, recruitment turned out to be very difficult and the strategy was changed to also include  
31  
32 adults without children, because the primary outcomes and sample size determinations were  
33  
34 based solely on adults. Screening visits were conducted between 29-Jun-2020 and 27-Sep-2021,  
35  
36 and the last patient last visit (CID at month 12) is scheduled for 30-Sep-2022.  
37  
38  
39  
40

## 41 Patient and public involvement

42 Neither patients nor the public were involved in the design and conduct of the study and they  
43  
44 will not be involved in interpretation, reporting, or dissemination of the trial.  
45  
46  
47

## 48 Participants

### 49 Recruitment and screening

50  
51  
52 Participants were recruited continuously by multiple routes e.g. web-pages, social media,  
53  
54 newspapers, and registries (local databases or civil registration numbers). Potential adult  
55  
56 participants were pre-screened by phone and answered questions on behalf of their child(ren). If  
57  
58 still eligible and interested after pre-screening, they received written information and were  
59  
60

invited to an information meeting. After the information meeting, an informed consent form and a general data protection regulation form were signed by the adult participant, and for children by the parents, or person(s) having custody and the site-PI or delegated staff. Thereafter, the screening visit was scheduled. Participants were screened in the fasting state, where all in- and exclusion criteria were assessed. The recruitment has ended with inclusion of 341 adults and 38 children.

### Eligibility criteria

Adults (men and women), 18-65 years, BMI $\geq$ 25 kg/m<sup>2</sup> and children (boys and girls), 6-12 years, and BMI-for-age $>$ 85<sup>th</sup> percentile were included. Children were only included if they had an eligible adult family member (i.e. as a family) - a biological relationship was not required. However, it was required that the family lived in the same household at least 4 days/week. Participants were required to have a regular consumption of sugar-containing/sugar-sweetened products and be motivated and willing to be randomised to any of the 2 intervention groups. All exclusion criteria are listed in Table 1. In- and exclusion criteria were assessed at screening, however, the site-PI or delegated personnel has the right to terminate participation at any time if deemed in the participant's best interest, and children are excluded if their adult family member's participation is discontinued.

**Table 1: List of exclusion criteria**

|                | Adults                                                                                                   | Children                                                                                      |
|----------------|----------------------------------------------------------------------------------------------------------|-----------------------------------------------------------------------------------------------|
| <i>General</i> |                                                                                                          |                                                                                               |
|                | Weight change $>$ 5% 2 months prior to screening                                                         | Intensive physical training ( $>$ 10 hours of per week)                                       |
|                | Surgical treatment of obesity                                                                            | Self-reported eating disorders                                                                |
|                | Blood donation $<$ 3 months prior to study initiation                                                    | Intolerance and allergies expected to interfere with the study                                |
|                | Change in smoking habits during the last month. (Smoking was allowed and monitored throughout the study) | Insufficient communication with national language                                             |
|                | Regularly drinking $>$ 21 (men) or $>$ 14 (women) units of alcohol per week                              | Inability, physically or mental, to comply with the procedures required by the study protocol |
|                | Intensive physical training ( $>$ 10 hours of per week)                                                  | Participant's general condition contraindicates continuing the study                          |
|                | Self-reported eating disorders                                                                           | Simultaneous participation in other clinical intervention studies                             |
|                | Intolerance and allergies expected to interfere with the study                                           |                                                                                               |
|                | Self-reported drug abuse within the previous 12 months                                                   |                                                                                               |
|                | Night- or shift work that ends later than 11 PM                                                          |                                                                                               |
|                | For women: Pregnancy, lactation                                                                          |                                                                                               |
|                | Persons who do not have access to either (mobile) phone or Internet                                      |                                                                                               |
|                | Insufficient communication with national language                                                        |                                                                                               |
|                | Inability, physically or mental, to comply with the procedures required by the study protocol            |                                                                                               |
|                | Participant's general condition contraindicates continuing the study                                     |                                                                                               |

| Adults                                                                                                                                                                                                                                                                                                                                                                                                                                                                                                                                                                                                                                                                                                                                                                                                                                                                                                    | Children                                                                                                                                                            |
|-----------------------------------------------------------------------------------------------------------------------------------------------------------------------------------------------------------------------------------------------------------------------------------------------------------------------------------------------------------------------------------------------------------------------------------------------------------------------------------------------------------------------------------------------------------------------------------------------------------------------------------------------------------------------------------------------------------------------------------------------------------------------------------------------------------------------------------------------------------------------------------------------------------|---------------------------------------------------------------------------------------------------------------------------------------------------------------------|
| Simultaneous participation in other clinical intervention studies                                                                                                                                                                                                                                                                                                                                                                                                                                                                                                                                                                                                                                                                                                                                                                                                                                         |                                                                                                                                                                     |
| <i>Medical conditions</i>                                                                                                                                                                                                                                                                                                                                                                                                                                                                                                                                                                                                                                                                                                                                                                                                                                                                                 |                                                                                                                                                                     |
| Diagnosed diabetes mellitus<br>Medical history of CVD (e.g. current angina; myocardial infarction or stroke within the past 6 months; heart failure; symptomatic peripheral vascular disease)<br>Systolic blood pressure above 160 mmHg and/or diastolic blood pressure above 100 mmHg (measured at screening) whether on or off treatment for hypertension<br>Significant liver diseases e.g. cirrhosis (fatty liver disease allowed)<br>Malignancy which was active or in remission for less than 5 years after last treatment (local basal and squamous cell skin cancer allowed)<br>Active inflammatory bowel disease, celiac disease, chronic pancreatitis or other disorder potentially causing malabsorption<br>Thyroid diseases, except Levothyroxine treatment of hypothyroidism if not on a stable dose for at least 3 months<br>Psychiatric illness (e.g. major depression, bipolar disorders) | Diagnosed diabetes mellitus<br>Other diseases that may influence the study outcomes                                                                                 |
| <i>Medication</i>                                                                                                                                                                                                                                                                                                                                                                                                                                                                                                                                                                                                                                                                                                                                                                                                                                                                                         |                                                                                                                                                                     |
| Use currently or within the previous 3 months of prescription or over the counter medication that had the potential of affecting body weight incl. food supplements<br>Exceptions related to medical conditions:<br>I) Cholesterol or blood pressure lowering medication were allowed if the participant's dose had not changed during the last 3 months<br>II) low dose antidepressants if they, in the judgement of the investigator, did not affect weight or study participation.<br>III) Levothyroxine for treatment of hypothyroidism if on a stable dose for at least 3 months                                                                                                                                                                                                                                                                                                                     | Use currently or within the previous 3 months of prescription or over the counter medication that had the potential of affecting body weight incl. food supplements |
| <i>Laboratory screening<sup>1</sup></i>                                                                                                                                                                                                                                                                                                                                                                                                                                                                                                                                                                                                                                                                                                                                                                                                                                                                   |                                                                                                                                                                     |
| Glucose >7.0 mmol/L<br>Haemoglobin:<br>women; <7.5 mmol/L (Copenhagen, Maastricht, Navarra, Athens)<br>men; <8.5 mmol/L (Copenhagen, Maastricht) and <8.1 mmol/L (Navarra, Athens)<br>For Maastricht participants only:<br>Creatinine <50 µmol/L and >100 µmol/L<br>ALT >34 IU                                                                                                                                                                                                                                                                                                                                                                                                                                                                                                                                                                                                                            | -                                                                                                                                                                   |

<sup>1</sup>Fasting blood sample was collected from adults and locally analysed to assess glucose and haemoglobin levels, and some additional values at Maastricht.

ALT, Alanine transaminase; CVD, cardiovascular diseases; IU, international unit

## Randomisation

After screening, eligible participants were randomly assigned to 1 of the 2 intervention groups in a 1:1 ratio by a site-specific randomisation list created by a person in Copenhagen not involved in the RCT. The randomisation was stratified by gender, age (<40 years or ≥40 years) and BMI (<30 or ≥30 kg/m<sup>2</sup>), and stratification was implemented by sequentially assigning families and adults from each stratum to the 2 interventions in blocks of 4, using the software R. Each household was randomised to the same intervention determined by the oldest member of the



1 household. Although randomisation was done after screening, it was not revealed to the  
2 household/participant before completion of the initial 2-month period.  
3  
4

## 6 **Intervention**

8 The 2 trial periods are illustrated in Figure 1.

### 11 Two-month period

12  
13 In the initial 2-month period, adults - regardless of randomisation - received a low-energy diet  
14 (LED) (Cambridge Weight Plan, Northants, United Kingdom). If the clinically relevant criteria  
15 for WL of  $\geq 5\%$  [21] was not achieved, the participant was excluded. During the 2-month period,  
16 adults visited the intervention site 2-3 times for collection of LED products, weighing and  
17 dietetic counselling. The LED consisted of 3,347-4,184 kJ/d, 15-20 E% fat, 35-40 E% protein  
18 and 45-50 E% carbohydrate. Four products per day were provided as shakes, soups, ready-to-  
19 drink products, and bars. Additionally, 200 g tomatoes, 125 g cucumber, 50 g lettuce, and  
20 chewing of maximum 6 pieces of sugar-free chewing gum or pastilles per day were allowed. For  
21 some adults (e.g. BMI  $> 40$  kg/m<sup>2</sup> or achieving a BMI  $\leq 23$  kg/m<sup>2</sup> during the LED without a wish  
22 to lose more weight), the LED was supplemented with milk/yoghurt, but only if it was expected  
23 that the required 5% WL could be achieved.  
24  
25  
26  
27  
28  
29  
30  
31  
32  
33  
34  
35  
36  
37  
38

39 In the initial 2-month period, children were encouraged to follow the dietary  
40 recommendations of the American Academy of Paediatrics on the prevention, assessment and  
41 treatment of overweight and obesity.[22] The goal was to obtain weight stability, which would  
42 reduce BMI-for-age z-score. For children, no weight criterion existed. Therefore, all children  
43 could continue into the WM period as long as their adult family member was included. Children  
44 were welcome to visit the intervention site for weighing and dietician counselling, however, it  
45 was not mandatory.  
46  
47  
48  
49  
50  
51  
52  
53  
54  
55

### 56 Ten-month period with S&SEs and sugar diets

57  
58 During the 10-month randomised intervention period, dietary counselling sessions will be  
59 practiced as individual (i.e. household) counselling sessions at months 2 and 6 and when Covid-  
60



19 restrictions allow in intervention groups (months 4 and 9). Otherwise, individual counselling sessions will be scheduled. The goals are to maintain WL for adults and BMI-for-age z-score for children. Further reduction in weight or BMI-for-age z-score is allowed, if the participant is compliant with the intervention, but counselling sessions will only cover maintenance aspects.

The 2 intervention diets are I) a healthy diet with <10 E% added sugar allowing foods and drinks with S&SEs (S&SEs group) and II) a healthy diet with <10 E% added sugar not allowing foods and drinks with S&SEs (Sugar group). Both diets are *ad libitum* and S&SEs cover all types (artificial, natural, low-calorie, sugar alcohols, non-caloric) available on the market. To secure dietary adherence calculation of maximum sugar intake (g) will be based on a diet with 9.5 E% sugar. The maximum allowed sugar intake will be calculated individually based on body weight at month 2 (re-calculated at month 6), using the formula by Henry [23] multiplied by the physical activity level (PAL). A unit system for the sugar and S&SEs intake has been developed, where individual maximum sugar intake is converted to a certain number of units per day (and week) (1 unit corresponding to 10 g sugar). One unit of S&SE product in the S&SE group is equal to the amount - in weight or volume - of 1 unit sugar-rich product in the Sugar group. For the S&SE group, as many sugar-containing products as possible should be replaced by S&SE products. Food exchange lists, covering categories listed in Table 2 including pictures of products, amounts and units per product, guide the participants in the 2 groups. Additional details and examples of the 2 interventions are provided in Table 3. Due to the characteristics of the study, blinding is not possible, however all efforts to blind study staff taking measurements and persons doing statistical analysis will be done.

**Table 2: Foods and drinks relevant for the 10-month randomized intervention period**

| Category                   | Examples                                                                                                                                                                                     |
|----------------------------|----------------------------------------------------------------------------------------------------------------------------------------------------------------------------------------------|
| Drinks                     | Carbonated soft drinks, fruit juice, non-carbonated soft drinks, cocoa powder, mixture of fruit syrup and water, energy drinks, pre-packed juices and nectars, protein shakes, energy drinks |
| Milk products              | Flavoured yoghurts, yoghurt drinks, milk shakes, chocolate milk, fermented milk, cold butter milk                                                                                            |
| Breakfast cereals          | Breakfast cereals, muesli, cereals bars, rolled oats                                                                                                                                         |
| Sugar, honey and marmalade | Sugar, syrup, honey, marmalade, jam, compote                                                                                                                                                 |
| Chocolate and bars         | Chocolate with and without filling, chocolate bars, chocolate/hazelnut paste/spread, thin sliced chocolate                                                                                   |

| Category          | Examples                                                                             |
|-------------------|--------------------------------------------------------------------------------------|
| Desserts          | Pudding, mousse, cold soufflé, custard, strained stewed fruit, Greek jelly, pancakes |
| Ice cream         | Ice cream, sorbet, ice lolly                                                         |
| Candy             | Wine gum, liquorice, bon-bon mix, marshmallow, marzipan                              |
| Cake and biscuits | Cake, cookies, biscuits, Danish pastry, sponge cake                                  |

**Table 3: Description of diets in the 10-month randomized intervention period**

|                           | Sugar group                                                                                                                                                                                                                              | S&SE group                                                                                                                                                                                                                                                                                                                                                                                                                                                                                                                                                                     |
|---------------------------|------------------------------------------------------------------------------------------------------------------------------------------------------------------------------------------------------------------------------------------|--------------------------------------------------------------------------------------------------------------------------------------------------------------------------------------------------------------------------------------------------------------------------------------------------------------------------------------------------------------------------------------------------------------------------------------------------------------------------------------------------------------------------------------------------------------------------------|
| Sugar-containing products | <10 E% added sugar.                                                                                                                                                                                                                      | <10 E% added sugar and as little as possible.                                                                                                                                                                                                                                                                                                                                                                                                                                                                                                                                  |
| S&SE products             | Not allowed.<br>Except for up to 2 pieces of sugar-free chewing gum per day.                                                                                                                                                             | Allowed.<br>No restrictions on specific types of S&SEs.                                                                                                                                                                                                                                                                                                                                                                                                                                                                                                                        |
| Units                     | Consumption of a maximum number of units (corresponding to 9.5 E% added sugar) of sugar-containing products each day/week.                                                                                                               | Unit calculation (corresponding to 9.5 E% added sugar in weight/volume) will guide the participant to ensure intake of <10 E% added sugar.<br>As many sugar-containing products in the diet as possible should be replaced with S&SE-containing products.<br>Ideally, the amount of S&SEs products corresponding to the maximal units from sugar-containing products should be consumed. However, if a participant experiences an adverse event, they are recommended to consume less than the calculated units and change to other S&SE products (e.g. avoid sugar-alcohols). |
| Example                   | For a participant with an energy requirement of 9,000 kJ/d, 9.5 E% from sugar corresponds to 50 gram added sugar = 5 units. 5 units per day or 35 units per week is then the maximum allowed intake of added sugar for this participant. | For a participant with an energy requirement of 9,000 kJ/d, 9.5 E% from sugar corresponds to 50 gram added sugar = 5 units.<br>Ideally, this participant should consume 5 units per day or 35 units per week of S&SE containing products.<br>One unit is equivalent to 1 unit in the sugar group (in weight or volume).                                                                                                                                                                                                                                                        |

E%, energy percentage; S&SEs, sweeteners and sweetness enhancers.

### *Compliance:*

Participants are required to record intake of all foods and drinks (pen and paper) for 4 days (3 weekdays and 1 weekend day) at months 0 and 12 with information on time, type/brand names, cooking and processing methods, weight or household measures. Daily average intake of energy, macro- and micro-nutrients will be calculated by national dietary software in the 4 intervention sites. From the food records, amount and intake of sugar and S&SEs in units from the products listed in Table 2 is also assessed at months 0 and 12. Furthermore, adults complete a food frequency questionnaire about intake of sweet products (sFFQ) during the past month and they collect 24-hour urine samples at months 0, 6, and 12. Urinary biomarkers of S&SEs (acesulfame-K, saccharin, sucralose, cyclamate, and steviol glycoronide) as well as fructose and sucrose will

1 be analysed by Wageningen University, the Netherlands, and urinary excretion of urea/nitrogen  
2  
3 will be analysed locally. Based on the above listed data, the participants' compliance with the  
4  
5 intervention diets will be assessed including associations between changes in outcomes e.g. body  
6  
7 weight, energy consumption, and sugar consumption.  
8  
9

## 10 **Data collection and outcomes**

11  
12  
13 Including information meeting, screening, counselling sessions and CIDs, the trial consists of a  
14  
15 minimum of 10 or 6 visits for adults and children, respectively. Data is collected according to  
16  
17 standard operation procedures (SOPs) and Table 4 shows activities/data collection at each visit.  
18  
19 Most data will be collected at months 0, 2, 6, and 12 where participants have fasted for a  
20  
21 minimum of 10 hours and avoided intensive physical exercise, coffee, and smoking for 12 hours  
22  
23 prior to the CIDs.  
24  
25  
26  
27  
28  
29  
30  
31  
32  
33  
34  
35  
36  
37  
38  
39  
40  
41  
42  
43  
44  
45  
46  
47  
48  
49  
50  
51  
52  
53  
54  
55  
56  
57  
58  
59  
60

Table 4: Flow chart for adults (A) and children (C) (full sampling at months 0 and 12)

|                                                     | Pre-screening | Information meeting | Screening      | Baseline         | 2-month period (CID1 to CID2) |                    |                  | 10-month randomised intervention period (CID2 to CID4) |                  |                    | 1-year assessment |
|-----------------------------------------------------|---------------|---------------------|----------------|------------------|-------------------------------|--------------------|------------------|--------------------------------------------------------|------------------|--------------------|-------------------|
| CID Visit Month                                     | -<br>-<br>0   | -<br>V0             | -<br>V1        | CID1<br>V2<br>0  | -<br>V3<br>0.5                | -<br>V4<br>1       | CID2<br>V5<br>2  | -<br>V6<br>4                                           | CID3<br>V7<br>6  | -<br>V8<br>9       | CID4<br>V9<br>12  |
| Inclusion/exclusion criteria                        | A+C           |                     | A+C            |                  |                               |                    |                  |                                                        |                  |                    |                   |
| Signing Informed Consent                            |               | A+C <sup>0</sup>    |                |                  |                               |                    |                  |                                                        |                  |                    |                   |
| Med. hist., medication etc.                         |               |                     | A+C            |                  |                               |                    |                  |                                                        |                  |                    |                   |
| Randomisation of the oldest family/household member |               |                     | A              |                  |                               |                    |                  |                                                        |                  |                    |                   |
| Supervision/counselling                             |               |                     |                | A+C <sup>1</sup> |                               | A(+C) <sup>2</sup> | A+C <sup>1</sup> | A(+C) <sup>2</sup>                                     | A+C <sup>1</sup> | A(+C) <sup>2</sup> | A+C <sup>1</sup>  |
| Collection of LED products                          |               |                     |                | A <sup>#</sup>   | A <sup>#</sup>                | A <sup>#</sup>     | A <sup>#</sup>   |                                                        |                  |                    |                   |
| Body weight and height <sup>4</sup>                 |               |                     | A+C            | A+C              | A <sup>3</sup>                | A <sup>3</sup>     | A+C              | A <sup>3</sup>                                         | A+C              | A <sup>3</sup>     | A+C               |
| Waist and hip circumference                         |               |                     |                | A+C              |                               |                    | A+C              |                                                        | A+C              |                    | A+C               |
| Body composition                                    |               |                     |                | A+C <sup>5</sup> |                               |                    | A                |                                                        |                  |                    | A+C <sup>5</sup>  |
| Blood pressure and heart rate                       |               |                     | A+C            | A+C              |                               |                    | A+C              |                                                        | A+C              |                    | A+C               |
| Fasting blood samples                               |               |                     | A <sup>6</sup> | A+C              |                               |                    | A+C <sup>7</sup> |                                                        | A+C              |                    | A+C               |
| Adverse events and concomitant medication           |               |                     |                | A+C              |                               |                    | A+C              |                                                        | A+C              |                    | A+C               |
| Allergenicity (skin prick test)                     |               |                     |                | A                |                               |                    |                  |                                                        |                  |                    | A                 |
| 24h urine collection (content of S&SEs)             |               |                     |                | A                |                               |                    |                  | A                                                      |                  |                    | A                 |
| Faecal spot sample                                  |               |                     |                | A                |                               |                    | A                |                                                        | A                |                    | A                 |
| 4-day dietary record                                |               |                     |                | A+C              |                               |                    |                  |                                                        |                  |                    | A+C               |
| <b>Questionnaires (electronic platforms):</b>       |               |                     |                |                  |                               |                    |                  |                                                        |                  |                    |                   |
| General background questionnaire                    |               |                     |                | A+C              |                               |                    |                  |                                                        |                  |                    |                   |
| Physical activity                                   |               |                     |                | A+C              |                               |                    |                  |                                                        |                  |                    | A+C               |
| Three factor eating questionnaire                   |               |                     |                | A+C              |                               |                    |                  |                                                        |                  |                    | A+C               |
| Leeds food preference questionnaire                 |               |                     |                | A+C              |                               |                    | A+C              |                                                        | A+C              |                    | A+C               |
| Allergenicity                                       |               |                     |                | A+C              |                               |                    |                  |                                                        |                  |                    | A+C               |
| Craving for sweet taste                             |               |                     |                | A                |                               |                    |                  |                                                        |                  |                    | A                 |
| Perception of S&SEs                                 |               |                     |                | A                |                               |                    |                  |                                                        | A <sup>8</sup>   |                    | A <sup>8</sup>    |
| Control of eating                                   |               |                     |                | A                |                               |                    | A                |                                                        | A                |                    | A                 |
| Subjective appetite sensations                      |               |                     |                | A                |                               |                    | A                |                                                        | A                |                    | A                 |
| Sweet food frequency questionnaire (FFQ)            |               |                     |                | A                |                               |                    |                  |                                                        |                  |                    | A                 |
| Diet satisfaction                                   |               |                     |                | A                |                               |                    |                  |                                                        | A                |                    | A                 |
| Perception and evaluation of the intervention       |               |                     |                |                  |                               |                    |                  |                                                        | A                |                    | A                 |
| Quality of life                                     |               |                     |                | A                |                               |                    |                  |                                                        |                  |                    | A                 |
| Puberty                                             |               |                     |                | C                |                               |                    |                  |                                                        | C                |                    | C                 |

<sup>#</sup>Adults will collect LED products from the intervention site every 2nd or 3rd week during the 2-month period. At months 0.5 and 1.5 (optional) the adults will be weighed and have the opportunity to consult a dietician.

<sup>0</sup>For children, the informed consent is signed by the parents/guardians.

<sup>1</sup>Individual/family counselling is preferably scheduled at the same day as the CID.

<sup>2</sup>Group counselling, children participation is preferred, but not mandatory.

<sup>3</sup>Fasting is not required for this body weight measurement.

<sup>4</sup>Height is only measured at screening for adults.

<sup>5</sup>At University of Maastricht, body composition is not measured in children.

<sup>6</sup>At screening, fasting blood samples will be analysed at each intervention site. All other blood samples are analysed at the Central Laboratory (Bioiatriki).

<sup>7</sup>At University of Maastricht, a fasting blood sample is not drawn from children at CID2.

<sup>8</sup>A shorter version of the questionnaire is used at CID3-4.

A, adult; C, child; CID, clinical investigation day; LED, low-energy diet; S&SEs, sweeteners and sweetness enhancers.

## Primary outcomes

This trial has 2 independent primary outcomes. The primary outcome for efficacy is 1-year change in body weight. The primary outcome for safety is 1-year change in gut microbiota composition associated with impaired health (e.g. change in microbial beta-diversity and composition). Both outcomes relate only to adults, and hence the required sample size was calculated for adults only.

### *Body weight*

Body weight is measured to the nearest 0.1 kg using a digital scale with the participant wearing underwear/light clothes. Fasting body weight will be measured at screening and CIDs, however fasting is not required, when body weight is measured at other visits.

### *Gut microbiota*

Gut microbiota composition will be assessed from faecal spot samples collected at home prior to all CIDs. Samples are immediately frozen (-20 °C) and later transported to the intervention site in cooling bags, whereafter they are stored at -80°C. Samples will be analysed targeting the V3-V4 regions of 16s rRNA genes by Illumina sequencing at Maastricht University, the Netherlands.

## Secondary outcomes

Secondary outcomes include changes in anthropometry and body composition (for children, BMI-for-age z-score), risk factors for T2D and CVD, allergenicity, adverse events (AE), and concomitant medication. Additionally, some secondary outcomes will be assessed in adult sub-groups e.g. gut-brain signalling markers, postprandial energy expenditure and substrate oxidation, physical activity, liver fat, adipose tissue and lipid metabolism, brain reward, insulin sensitivity markers, and composition and functionality of the human gut microbiota in vitro. Furthermore, children's gut microbiota composition may be analysed depending on the final sample size (Table 5).

## *Anthropometry*

Height is measured to the nearest 0.5 cm using a stadiometer at screening and for children at all CIDs. For adults, BMI is calculated as body weight (kg) / height<sup>2</sup> (m<sup>2</sup>). For children, the WHO AnthroPlus software ([www.who.int/tools/growth-reference-data-for-5to19-years/application-tools](http://www.who.int/tools/growth-reference-data-for-5to19-years/application-tools)) is applied to calculate BMI-for-age percentile and z-score. Waist and hip circumferences are measured twice with a non-elastic tape measure on the skin to the nearest 0.5 cm, and the average is calculated. Waist circumference is measured halfway between the lowest rib and iliac crest during exhalation. Hip circumference is measured as the largest circumference in the area around the buttock. Dual-energy X-ray absorptiometry (DXA) scans are performed in underwear to assess body composition including fat percentage, fat mass and fat free mass.

## *Blood pressure and heart rate*

After minimum 5 minutes rest in a sitting position, blood pressure (mmHg) and heart rate (beats per minute) are measured 3 times on the right arm with an automatically inflated cuff. An average is calculated from the last 2 measurements if the 2 measurements differ with  $\leq 5$  mmHg. If either the systolic or diastolic blood pressure differ by  $> 5$  mmHg, a 4<sup>th</sup> measurement is performed and the average calculated from the third and 4<sup>th</sup> measurement.

## *Blood samples*

Fasting venous blood samples are drawn at all CIDs, except at month 2 for children at Maastricht due to Ethical concerns. Serum samples are collected for analyses of lipids (triglycerides, total, low-density lipoprotein, and high-density lipoprotein cholesterol), alanine aminotransferase, aspartate aminotransferase, insulin, C-reactive protein, and immunoglobulin E. Plasma is collected for glucose analysis and full blood for HbA1c analysis. All samples are stored locally at -80 °C until shipment to the central lab at Bioiatriki S.A., Greece.

## *Skin prick test*

For adults, a skin prick test is performed on the forearm. One drop of the allergens hazel, alder, birch, grass mix, artemisia absinthium, ragweed, alternaria, moulds mix, cat, dog,

1  
2 dermatophagoides pteronyssinus and dermatophagoides mix as well as positive and negative  
3  
4 control solutions are applied. The response is recorded after 15 minutes.  
5  
6

### 7 *Adverse events and concomitant medication*

8  
9 All AEs experienced after inclusion and during the trial are registered. At CIDs, the participant is  
10  
11 asked if he/she has noticed any unfavourable events since the last CID. During the 10-month  
12  
13 randomised intervention period, participants - regardless of intervention - are asked directly about  
14  
15 certain AEs that may be related to consumption of S&SE i.e. gastrointestinal symptoms and  
16  
17 headache. All medication necessary for the participants' health, not listed in the protocol  
18  
19 exclusion criteria, may be continued during the trial. At CIDs, the participant is asked if he/she  
20  
21 has taken any new medicine or has changed dosage of already registered medicine.  
22  
23  
24  
25

### 26 *Other outcomes*

27  
28 Questionnaires are used to obtain information about sociodemographic characteristics such as  
29  
30 education, occupation, household income etc., physical activity, quality of life, and to investigate  
31  
32 subjective neuro-behavioural indices e.g. food preferences and preference for sweet taste,  
33  
34 perception of S&SEs, cravings, subjective appetite sensations, and perception and evaluation of  
35  
36 the 10-month randomised intervention period. Furthermore, puberty is assessed for children. All  
37  
38 questionnaires are prepared in English and translated into local language. The majority of  
39  
40 questionnaires will be delivered by a Questionnaire Delivery Platform (QDP) implemented by  
41  
42 NetUnion, Switzerland. At baseline all questionnaires are completed at the intervention sites, but  
43  
44 before other CIDs adults can complete those delivered by the QDP at home prior to the CID.  
45  
46 Children always complete all questionnaires at the intervention site. Two questionnaires are  
47  
48 always completed at the intervention site; 1 about perception of S&SEs (delivered by the  
49  
50 Qualtrics platform via a weblink) and 1 about food rewards assessed by the Leeds Food  
51  
52 Preference Questionnaire (E-prime software).  
53  
54  
55  
56  
57  
58  
59  
60

## Sub-groups and sub-studies

Some of the secondary and other outcomes are collected in sub-studies and in sub-groups of different participants (Table 5).

**Table 5: Secondary and other outcomes investigated in sub-studies and in sub-groups.**

| Outcome                                                                                                  | Measurements and method                                                                                                                                   | Participants                                        | Time points of data collection |                 |                 |                  |
|----------------------------------------------------------------------------------------------------------|-----------------------------------------------------------------------------------------------------------------------------------------------------------|-----------------------------------------------------|--------------------------------|-----------------|-----------------|------------------|
|                                                                                                          |                                                                                                                                                           |                                                     | Baseline                       | After WL        | After WM        |                  |
|                                                                                                          |                                                                                                                                                           |                                                     | Month 0<br>CID1                | Month 2<br>CID2 | Month 6<br>CID3 | Month 12<br>CID4 |
| <b>Sub-studies (include an intervention)</b>                                                             |                                                                                                                                                           |                                                     |                                |                 |                 |                  |
| <b>Brain reward activity</b>                                                                             | Brain activity is measured by fMRI after consumption of a drink with sugar, S&SEs, water                                                                  | Sub-study incl. a sub-group of adults in Maastricht | A                              | A               |                 | A                |
| <b>Postprandial responses (energy expenditure, substrate oxidation, blood biochemistry and appetite)</b> | Indirect calorimetry, blood sampling, appetite sensation based on VAS and <i>ad libitum</i> energy intake after consumption of a drink with S&SE or water | Sub-study incl. a sub-group of adults in Copenhagen | A                              | A               | A               |                  |
| <b>Sub-groups</b>                                                                                        |                                                                                                                                                           |                                                     |                                |                 |                 |                  |
| <b>Physical activity</b>                                                                                 | 7-day measurements by accelerometer                                                                                                                       | Adults in Maastricht                                | A                              |                 | A               | A                |
| <b>Gut-brain signalling markers</b>                                                                      | Analyses of GLP-1, CCK, and ghrelin from fasting blood samples                                                                                            | Adults in Copenhagen and Maastricht                 | A                              | A               | A               | A                |
| <b>Liver fat</b>                                                                                         | <sup>1</sup> H-MRS                                                                                                                                        | Sub-group of adults in Maastricht                   | A                              | A               |                 | A                |
| <b>Adipose tissue function and lipid metabolism</b>                                                      | Adipocyte morphology, ex vivo lipolysis, gene and protein expression analyses of adipose tissue samples (biopsy)                                          | Adults in Maastricht                                | A                              | A               |                 | A                |
| <b>Insulin sensitivity markers</b>                                                                       | Indices e.g. HOMA-IR, Matsuda index, Disposition index etc. calculated from a 7-point OGTT                                                                | Adults in Maastricht                                | A                              | A               |                 | A                |
| <b>Gut microbiota</b>                                                                                    | 16S rRNA illumine sequencing of faecal samples                                                                                                            | Children in Maastricht                              | C                              |                 | C               | C                |
| <b>Composition and functionality of the human gut microbiota in vitro</b>                                | Microbial metabolites, e.g. SCFA and 16S rRNA illumine sequencing of faecal samples                                                                       | Sub-group of adults in Maastricht                   | A                              |                 |                 |                  |

A, adults; C, children; CCK, cholecystokinin; CID, clinical investigation day; fMRI, functional Magnetic Resonance Imaging; GLP-1, glucagon-like peptide 1; <sup>1</sup>H-MRS, Proton Magnetic Resonance Spectroscopy; HOMA-IR, Homeostatic Model Assessment for Insulin Resistance, OGTT, oral glucose tolerance test; SCFA, short chain fatty acids; S&SEs, sweeteners and sweetness enhancers; VAS, visual analogue scales; WL, weight loss, WM, weight maintenance.

## Statistical methods

### Sample size determination

The sample size calculation is based on adults for the 2 primary outcomes. For body weight, a clinically meaningful effect of 1.5 kg placebo subtracted body weight has previously been approved by the European Food Safety Authority.[24] Based on a similar trial [25] we estimated that a difference of 1.5 kg with a SD of  $\pm 3.5$  kg, a 90% power, a 2-sided  $\alpha$  of 0.05, would require 231 completers. With an estimated drop-out of 30% a minimum of 330 adult participants should



1  
2 be included. For change in gut microbiota, a  $\pm 10\%$  change in 20 of the 50 most abundant  
3 operational taxonomic units (OTUs) with an alpha of  $< 0.05\%$ , would require 100 complete  
4 samples. The inclusion of at least 330 adults (approximately 25% of the participants per  
5 intervention site) is therefore also sufficient to detect possible changes in gut microbiota.  
6  
7  
8  
9

## 10 11 12 Statistical analysis plan

13  
14 As part of the SWEET project a statistical analysis plan has been developed. For body weight, 1-  
15 year change between the 2 interventions will be analysed by analysis of covariance (ANCOVA)  
16 linear mixed model, with change in body weight as response; treatment group and relevant  
17 covariates e.g. age, gender, and BMI are fixed effects. Participant ID and intervention site are  
18 random (intercept) effects. Intention-to-treat principle will be applied on those completing the  
19 initial 2-month period. Additionally, complete-case analyses (all dropouts omitted) and per  
20 protocol analyses (only compliant participants) as well as analyses including additional covariate  
21 adjustments (e.g. energy density) and intermediate time points will be applied.  
22  
23  
24  
25  
26  
27  
28  
29  
30  
31

32 For gut microbiota, 1-year change in microbial diversity and microbial composition (relative  
33 abundance at phyla and genera level) will be analysed. Paired Wilcoxon test is used to study  
34 within intervention changes in relative abundance. Linear mixed models with Benjamin-  
35 Hochberg correction for multiple testing will be used for between-intervention comparisons.  
36  
37  
38  
39  
40

41 Data will be presented with the use of standard descriptive statistics shown as mean (SD) or  
42 median (Q1:Q3) for normally and non-normally distributed data, respectively, and categorical  
43 data by percentages. Results will be presented as mean difference in changes  $\pm$ SEM or 95% CIs  
44 and p-values when relevant. A statistical level of 0.05 will be applied and graphical models will  
45 be carried out to assess model assumptions. When relevant, transformation e.g. logarithm, will be  
46 applied or non-parametric statistical tests will be performed.  
47  
48  
49  
50  
51  
52  
53  
54

55 For secondary outcomes on continuous data, the main analysis will compare the 1-year mean  
56 change between the 2 treatment groups by use of the ANCOVA-type linear mixed model defined  
57 above without any multiplicity adjustment or imputation of missing values (i.e. available-case  
58  
59  
60

1  
2 analyses). Additional sensitivity analyses may be carried out as appropriate in the same way as  
3  
4 for the primary outcome. Furthermore, analysis of repeated measures will be performed using  
5  
6 linear mixed models including time×treatment interaction, time, and treatment effects, covariates  
7  
8 (e.g. age, gender, BMI) as fixed effects, and participant ID and intervention sites as random  
9  
10 effects. In case of significant time×treatment interaction, differences between treatments will be  
11  
12 identified per time point. Mean changes will be compared between the groups using the estimated  
13  
14 mean difference and approximate t-tests derived from the fitted linear mixed models (assuming a  
15  
16 2-sided alternative). For secondary categorical outcome (e.g. yes/no, 0/1/2, etc.) logistic or  
17  
18 ordinal mixed effects model will be used, including the same fixed and random effects as the  
19  
20 linear mixed models.  
21  
22  
23  
24  
25  
26

## 27 **ETHICS AND DISSEMINATION**

28  
29 The RCT will be conducted in accordance with the Declaration of Helsinki[26] and this master  
30  
31 protocol (version 3.0, 28-Oct-2020) is approved by the responsible national/regional committee  
32  
33 in the 4 countries from where consent to all previous and future amendments to the protocol was  
34  
35 and will be obtained. All adults receive the LED products free of charge. At Copenhagen,  
36  
37 Navarra and Athens participants will not receive reimbursement for their participation. At  
38  
39 Maastricht, travel expenses and financial compensation are provided to all eligible participants  
40  
41 (125 Euros for adults without child(ren) and 250 Euros for 1 adult and 1 child + 80 Euros per  
42  
43 extra family member).  
44  
45  
46

47  
48 There are no risks related to the dietary interventions, however discomfort may occur. The  
49  
50 LED (not provided for children) contains all needed nutrients, but only little energy and therefore  
51  
52 adults may experience headaches, dizziness, tiredness, and nausea particularly in the first few  
53  
54 days. Constipation, stomach cramps or more profound nausea can occur and information on this  
55  
56 is given before inclusion. However, allergic reactions to the LED are rare. The sugar and S&SEs  
57  
58 intervention products are commercially available foods and drinks purchased in the supermarket  
59  
60 and no adverse side effects are expected. However, changes in gastrointestinal symptoms (e.g.

1  
2 bloating and excess gas production) may occur depending on the participant's habitual intakes of  
3  
4 fibre and types of S&SEs e.g. sugar alcohols. At each intervention site, a physician can be  
5  
6 consulted in case of medical uncertainties.  
7  
8

9  
10 Some study procedures involve risks, but the procedures implemented are designed to  
11  
12 minimize these. Drawing blood samples will seldom cause harm besides that associated with the  
13  
14 insertion, however, children will be offered local anaesthetic Emla patches to reduce pain. A  
15  
16 maximum of 80 ml and 125 ml of blood is drawn during the 1-year trial for children and adults,  
17  
18 respectively. For children, this is less than 1 ml blood/kg body weight per donation, which is  
19  
20 considered safe. Fertile women will be tested for pregnancy before DXA scanning and excluded  
21  
22 from the trial if pregnant. The DXA scans will induce minor radiation (<0.010 mSv per scan).  
23  
24 Scanning will be done 2 and 3 times during the 1-year trial for children and adults, respectively,  
25  
26 and only 1 re-scan will be allowed per CID. The skin prick test, only performed in adults, is  
27  
28 anticipated to cause very little discomfort. A positive reaction may cause itching, which will be  
29  
30 treated with a salve. In very rare cases, a systemic anaphylactic reaction can occur and emergency  
31  
32 equipment is in place.  
33  
34  
35

36  
37 For children, special attention is given to ensure that the child is not forced to participate by  
38  
39 the adult family member. Furthermore, a child cannot remain included if the adult family member  
40  
41 drops out or is excluded from the trial.  
42  
43

44 All participants will be insured against injury caused by their participation according to local  
45  
46 legal requirements. The trial is monitored by the European Clinical Research Infrastructure  
47  
48 Network (ECRIN) to ensure compliance with the protocol and SOPs. All trial-related information  
49  
50 will be recorded, handled, and stored safely allowing accurate reporting, interpretation, and  
51  
52 verification. All data will be collected in a central DataHub at Copenhagen from where pseudo-  
53  
54 anonymised data can be requested until 2032 via a data sharing contract. From 2032, fully  
55  
56 anonymised data can be transferred. Source data is collected on paper first or is entered directly  
57  
58 into the electronic systems e.g. the QDP, the Qualtrics platform, and/or the Research Electronic  
59  
60

1  
2 Data Capture (REDCap) tool hosted at the University of Copenhagen.[27,28] REDCap is a secure,  
3 web-based software platform designed to support data capture. Source data from DXA scans and  
4 analysis of biological material are registered on the device or related hardware, whereas the  
5 source data from dietary records (handwritten on paper) will be entered into a national dietary  
6 software program for analysis. The sponsor/investigator will provide direct access to source  
7 data/documents for inspection.  
8  
9  
10  
11  
12  
13  
14

15  
16 Results will be published in international peer-reviewed scientific journals regardless of  
17 whether the findings are positive, negative, or inconclusive.  
18  
19  
20  
21

## 22 **DISCUSSION**

23  
24 The strengths of this RCT are the investigation of the long-term effects of S&SEs in the contexts  
25 of an *ad libitum* healthy diet not only including drinks, but also foods, compared to added sugar.  
26 The 10-month weight loss maintenance period - where the effects of S&SEs are investigated - is a  
27 very critical period. Thus based on previous research, individuals are expected to regain at least  
28 some of their lost body weight. [29,30] The long duration of the weight loss maintenance period  
29 is important when studying changes in body weight (1 of the 2 primary outcomes) as highlighted  
30 by the European Food Safety Authority (EFSA). [31] In 2020, the effect of S&SEs on body  
31 weight was extensively reviewed by Rogers & Appleton. [11] They identified 9 studies where  
32 effects of S&SEs, compared with sugar, were investigated in participants with overweight or  
33 obesity. Of these 9 studies, only 2 studies investigated effects of both foods and drinks [32,33]  
34 and 5 of the 9 studies investigated effects of a single S&SE. Furthermore, only 2 studies [34,35]  
35 had a duration of a minimum of 6 months, but none of these had the same weight loss and weight  
36 maintenance design as the current RCT. Thus, studies investigating the effect of S&SEs,  
37 compared to sugar, for weight loss maintenance are lacking. Other strengths are that the trial is  
38 conducted as a multicentre trial covering 4 European countries with both adults and children  
39 included. Furthermore, data will cover a broad range of measurements related to health (body  
40 weight management, risk factors for CVD, T2D, etc.) and safety (microbiology, allergy, adverse  
41  
42  
43  
44  
45  
46  
47  
48  
49  
50  
51  
52  
53  
54  
55  
56  
57  
58  
59  
60

1  
2 events), appetite and food preferences, These will be measured at baseline, after a 2-month WL  
3  
4 (adults) or 2-month weight stability (children) period, and after a 10-month intervention period. A  
5  
6 trial limitation is that the number of included children was lower than initially planned, but this  
7  
8 will not affect the 2 primary outcomes. Another limitation is that data related to energy and  
9  
10 nutrient intakes (food records) are only collected at baseline and at months 12. However, urinary  
11  
12 S&SE biomarkers collected at baseline, month 6 and month 12 will indicate if compliance  
13  
14 decreases before month 12.  
15  
16  
17  
18  
19

## 20 **AUTHORS' CONTRIBUTIONS**

21  
22 The SWEET EU-project was initiated by JCGH, AR, and JH. The protocol for the SWEET  
23  
24 intervention trial was written by LK, AR, and YM, with contribution from EEB and JAM. AR,  
25  
26 YM, EEB, and JAM are principal investigators (PI) at the 4 intervention sites, where LK, SSHA,  
27  
28 SN-C, KR and TCA are investigators. EJMF, GF, CEH, TL, and HM are responsible for specific  
29  
30 methods, platforms, or analyses, and Mda is responsible for monitoring of the trial. LK and AR  
31  
32 drafted the manuscript and YM, EEB, and JAM critically reviewed the manuscript. All authors  
33  
34 read and approved the final manuscript.  
35  
36  
37  
38  
39

## 40 **FUNDING STATEMENT**

41  
42 The PI, AR, is also the sponsor (e-mail: [ara@nexs.ku.dk](mailto:ara@nexs.ku.dk), Phone: +45 21 30 69 12, Department of  
43  
44 Nutrition, Exercise and Sports, University of Copenhagen, Rolighedsvej 26, 1958 Frederiksberg,  
45  
46 Denmark). The trial is funded by the Horizon2020 program: *Sweeteners and sweetness*  
47  
48 *enhancers: Impact on health, obesity, safety and sustainability* (acronym: SWEET, grant  
49  
50 #774293) and funding covers salary for project personal, supplies, remuneration, and  
51  
52 dissemination of results. The amount is deposited in a project account subject to audits/public  
53  
54 revision.  
55  
56  
57  
58  
59  
60

## COMPETING INTERESTS STATEMENT

AR has received honoraria from Unilever and the International Sweeteners Association. CEH's research centre provides consultancy to, and has received travel funds to present research results from organisations supported by food and drink companies. JCGH and JH have received project funds from the American Beverage Association. TL works for a company, NetUnion sarl, which has no conflict of interest in the study outcome.

For peer review only

## REFERENCES

- 1 World Health Organization (WHO). Noncommunicable diseases country profiles 2018. Geneva: 2018.
- 2 World Health Organization (WHO). Guideline: Sugar intake for adults and children. Geneva: 2015.
- 3 Nordic Council of Ministers. *Nordic Nutrition Recommendations 2012. Integrating nutrition and physical activity*. Norden 2014.
- 4 Technical University of Denmark (DTU) The National Food Institute. Dietary habits in Denmark 2011-2013 [Report in Danish: Danskernes kostvaner 2011-2013]. Denmark: 2015.
- 5 Institute of Preventive Medicine Environmental and Occupational Health. National dietary guidelines for Greek adults and children. Greece: 2014.
- 6 Ruiz E, Rodriguez P, Valero T, *et al*. Dietary Intake of Individual ( Free and Intrinsic ) Sugars and Food Sources in the Spanish Population : Findings from the ANIBES Study. *Nutrients* 2017;**9**. doi:10.3390/nu9030275
- 7 Diewertje S, van Less L, Engelen AI, *et al*. Total, free, and added sugar consumption and adherence to guidelines : The Dutch National Food Consumption Survey 2007-2010. *Nutrients* 2016;**8**. doi:10.3390/nu8020070
- 8 Nettleton JE, Reimer RA, Shearer J. Reshaping the gut microbiota : Impact of low calorie sweeteners and the link to insulin resistance ? *Physiology & Behavior* 2016;**164**:488–93. doi:10.1016/j.physbeh.2016.04.029
- 9 Sylvestsky AC, Rother KI, Sciences N, *et al*. HHS Public Access. 2017;**164**:446–50. doi:10.1016/j.physbeh.2016.03.030.Trends
- 10 O'Connor D, Pang M, Castelnovo G, *et al*. A rational review on the effects of sweeteners and sweetness enhancers on appetite, food reward and metabolic/adiposity outcomes in adults. *Food and Function* 2021;**12**:442–65. doi:10.1039/d0fo02424d
- 11 Rogers PJ, Appleton KM. The effects of low-calorie sweeteners on energy intake and body weight: a systematic review and meta-analyses of sustained intervention studies. *International Journal of Obesity* 2021;**45**:464–78. doi:10.1038/s41366-020-00704-2
- 12 Toews I, Lohner S, Küllenberg De Gaudry D, *et al*. Association between intake of non-sugar sweeteners and health outcomes: Systematic review and meta-analyses of randomised and non-randomised controlled trials and observational studies. *BMJ (Online)* 2019;**364**:k4718. doi:10.1136/bmj.k4718
- 13 Anker CCB, Rafiq S, Jeppesen PB. Effect of steviol glycosides on human health with emphasis on type 2 diabetic biomarkers: A systematic review and meta-analysis of randomized controlled trials. *Nutrients* 2019;**11**:1965. doi:10.3390/nu11091965
- 14 Peters JC, Beck J, Cardel M, *et al*. The Effects of Water and Non-Nutritive Sweetened Beverages on Weight Loss and Weight Maintenance : A Randomized Clinical Trial. 2016;**24**:297–304. doi:10.1002/oby.21327
- 15 Normand M, Ritz C, Mela D, *et al*. Low-energy sweeteners and body weight: A citation network analysis. *BMJ Nutrition, Prevention and Health* 2021;**4**:319–32. doi:10.1136/bmjnph-2020-000210



- 1  
2  
3 16 Greyling A, Appleton KM, Raben A, *et al.* Acute glycemc and insulinemic effects of low-energy  
4 sweeteners: A systematic review and meta-analysis of randomized controlled trials. *American*  
5 *Journal of Clinical Nutrition* 2020;**112**:1002–14. doi:10.1093/ajcn/nqaa167  
6  
7 17 Nichol AD, Holle MJ, An R. Glycemic impact of non-nutritive sweeteners: A systematic review  
8 and meta-analysis of randomized controlled trials. *European Journal of Clinical Nutrition*  
9 2018;**72**:796–804. doi:10.1038/s41430-018-0170-6  
10  
11 18 del Pozo S, Gómez-Martínez S, Díaz LE, *et al.* Potential Effects of Sucralose and Saccharin on Gut  
12 Microbiota: A Review. *Nutrients* 2022;**14**:1682. doi:10.3390/nu14081682  
13  
14 19 Cao Y, Liu H, Qin N, *et al.* Impact of food additives on the composition and function of gut  
15 microbiota: A review. *Trends in Food Science & Technology* 2020;**99**:295–310.  
16 doi:10.1016/J.TIFS.2020.03.006  
17  
18 20 Suez J, Korem T, Zeevi D, *et al.* Artificial sweeteners induce glucose intolerance by altering the  
19 gut microbiota. *Nature* 2014;**514**:181–6. doi:10.1038/nature13793  
20  
21 21 Williamson DA, Bray GA, Ryan DH. Is 5% weight loss a satisfactory criterion to define clinically  
22 significant weight loss? *Obesity* 2015;**23**:2319–20. doi:10.1002/OBY.21358  
23  
24 22 Barlow SE, MPH and the Expert Committee. Expert Committee Recommendations Regarding the  
25 Prevention, Assessment, and Treatment of Child and Adolescent Overweight and Obesity :  
26 Summary Report. *Pediatrics* 2007;**120**:S164–92. doi:10.1542/peds.2007-2329C  
27  
28 23 Henry C. Basal metabolic rate studies in humans: measurement and development of new equations.  
29 *Public Health Nutrition* 2005;**8**:1133–52. doi:10.1079/phn2005801  
30  
31 24 European Food Safety Authority (EFSA). Nutrition and Allergies (NDA). Scientific Opinion on  
32 the substantiation of health claims related to konjac mannan (glucomannan) and reduction of body  
33 weight (ID 854, 1556, 3725), reduction of post-prandial glycaemic responses (ID 1559),  
34 maintenance of normal blood glucose concentration. *EFSA Journal* 2010;**8**.  
35 doi:10.2903/j.efsa.2010.1798  
36  
37 25 Peters JC, Wyatt HR, Foster GD, *et al.* The Effects of Water and Non-Nutritive Sweetened  
38 Beverages on Weight Loss During a 12-week Weight Loss Treatment Program. 2014;**22**:1415–21.  
39 doi:10.1002/oby.20737  
40  
41 26 World Medical Association. World Medical Association Declaration of Helsinki: ethical principles  
42 for medical research involving human subjects. *J Am Coll Dent* 2014;**81**:14–8.  
43 doi:10.1093/acprof:oso/9780199241323.003.0025  
44  
45 27 Harris PA, Taylor R, Thielke R, *et al.* Research electronic data capture (REDCap)-A metadata-  
46 driven methodology and workflow process for providing translational research informatics support.  
47 *Journal of Biomedical Informatics* 2009;**42**:377–81. doi:10.1016/j.jbi.2008.08.010  
48  
49 28 Harris PA, Taylor R, Minor BL, *et al.* The REDCap consortium: Building an international  
50 community of software platform partners. *Journal of Biomedical Informatics* 2019;**95**:103208.  
51 doi:10.1016/j.jbi.2019.103208  
52  
53 29 Kouvelioti R, Vagenes G, Langley-Evans S. Effects of exercise and diet on weight loss  
54 maintenance in overweight and obese adults: a systematic review. *J sports Med Phys Fitness*  
55 2014;**54**:456–74.  
56  
57  
58  
59  
60



- 1  
2  
3 30 Kraschnewski JL, Boan J, Esposito J, *et al.* Long-term weight loss maintenance in the United  
4 States. *Int J Obes (Lond)* 2010;**34**:1644–54. doi:10.1038/IJO.2010.94  
5  
6 31 EFSA Panel on Dietetic Products Nutrition and Allergies (NDA). Guidance on the scientific  
7 requirements for health claims related to appetite ratings, weight management, and blood glucose  
8 concentrations. *EFSA Journal* 2012;**10**. doi:10.2903/j.efsa.2012.2604  
9  
10 32 Blackburn GL, Kanders BS, Lavin PT, *et al.* The effect of aspartame as part of a multidisciplinary  
11 weight-control program on short- and long-term control of body weight. *Am J Clin Nutr*  
12 1997;**65**:409–18. doi:10.1093/AJCN/65.2.409  
13  
14 33 Raben A, Vasilaras TH, Møller AC, *et al.* Sucrose compared with artificial sweeteners: different  
15 effects on ad libitum food intake and body weight after 10 wk of supplementation in overweight  
16 subjects. *Am J Clin Nutr* 2002;**76**:721–9. doi:10.1093/AJCN/76.4.721  
17  
18 34 Engel S, Tholstrup T, Bruun JM, *et al.* Effect of high milk and sugar-sweetened and non-caloric  
19 soft drink intake on insulin sensitivity after 6 months in overweight and obese adults: a randomized  
20 controlled trial. *European Journal of Clinical Nutrition* 2018;**72**:358–66. doi:10.1038/s41430-017-  
21 0006-9  
22  
23 35 Tate DF, Turner-McGrievy G, Lyons E, *et al.* Replacing caloric beverages with water or diet  
24 beverages for weight loss in adults: main results of the Choose Healthy Options Consciously  
25 Everyday (CHOICE) randomized clinical trial. *Am J Clin Nutr* 2012;**95**:555–63.  
26 doi:10.3945/AJCN.111.026278  
27  
28  
29  
30  
31  
32  
33  
34  
35  
36  
37  
38  
39  
40  
41  
42  
43  
44  
45  
46  
47  
48  
49  
50  
51  
52  
53  
54  
55  
56  
57  
58  
59  
60

## FIGURE LEGEND

**Figure 1:** Overall study design.

Solid lines are CIDs and dashed lines are dietary counselling sessions where non-fasting body weight of adults is measured. Additionally, LED products for adults will be collected from the intervention site every 2nd or 3rd week during the initial 2-month period.

BMI, body mass index; CID, clinical investigation day; S&SEs, sweeteners and sweetness enhancers.

For peer review only

1  
2  
3  
4  
5  
6  
7  
8  
9  
10  
11  
12  
13  
14  
15  
16  
17  
18  
19  
20  
21  
22  
23  
24  
25  
26  
27  
28  
29  
30  
31  
32  
33  
34  
35  
36  
37  
38  
39  
40  
41





SPIRIT 2013 Checklist: Recommended items to address in a clinical trial protocol and related documents\*

| Section/item                      | Item No | Description                                                                                                                                                                                                                                                                              | Page no. |
|-----------------------------------|---------|------------------------------------------------------------------------------------------------------------------------------------------------------------------------------------------------------------------------------------------------------------------------------------------|----------|
| <b>Administrative information</b> |         |                                                                                                                                                                                                                                                                                          |          |
| Title                             | 1       | Descriptive title identifying the study design, population, interventions, and, if applicable, trial acronym                                                                                                                                                                             | 1        |
| Trial registration                | 2a      | Trial identifier and registry name. If not yet registered, name of intended registry                                                                                                                                                                                                     | 4        |
|                                   | 2b      | All items from the World Health Organization Trial Registration Data Set                                                                                                                                                                                                                 | NA       |
| Protocol version                  | 3       | Date and version identifier                                                                                                                                                                                                                                                              | 18       |
| Funding                           | 4       | Sources and types of financial, material, and other support                                                                                                                                                                                                                              | 21       |
| Roles and responsibilities        | 5a      | Names, affiliations, and roles of protocol contributors                                                                                                                                                                                                                                  | 1-2+21   |
|                                   | 5b      | Name and contact information for the trial sponsor                                                                                                                                                                                                                                       | 21       |
|                                   | 5c      | Role of study sponsor and funders, if any, in study design; collection, management, analysis, and interpretation of data; writing of the report; and the decision to submit the report for publication, including whether they will have ultimate authority over any of these activities | 21       |
|                                   | 5d      | Composition, roles, and responsibilities of the coordinating centre, steering committee, endpoint adjudication committee, data management team, and other individuals or groups overseeing the trial, if applicable (see Item 21a for data monitoring committee)                         | 21       |
| <b>Introduction</b>               |         |                                                                                                                                                                                                                                                                                          |          |
| Background and rationale          | 6a      | Description of research question and justification for undertaking the trial, including summary of relevant studies (published and unpublished) examining benefits and harms for each intervention                                                                                       | 5        |
|                                   | 6b      | Explanation for choice of comparators                                                                                                                                                                                                                                                    | 5        |
| Objectives                        | 7       | Specific objectives or hypotheses                                                                                                                                                                                                                                                        | 6        |

|    |                                                           |     |                                                                                                                                                                                                                                                                                                                                                                                |                      |
|----|-----------------------------------------------------------|-----|--------------------------------------------------------------------------------------------------------------------------------------------------------------------------------------------------------------------------------------------------------------------------------------------------------------------------------------------------------------------------------|----------------------|
| 1  |                                                           |     |                                                                                                                                                                                                                                                                                                                                                                                |                      |
| 2  | Trial design                                              | 8   | Description of trial design including type of trial (eg, parallel group, crossover, factorial, single group), allocation ratio, and framework (eg, superiority, equivalence, noninferiority, exploratory)                                                                                                                                                                      | 6-7+9                |
| 3  |                                                           |     |                                                                                                                                                                                                                                                                                                                                                                                |                      |
| 4  |                                                           |     |                                                                                                                                                                                                                                                                                                                                                                                |                      |
| 5  |                                                           |     |                                                                                                                                                                                                                                                                                                                                                                                |                      |
| 6  |                                                           |     |                                                                                                                                                                                                                                                                                                                                                                                |                      |
| 7  |                                                           |     |                                                                                                                                                                                                                                                                                                                                                                                |                      |
| 8  | <b>Methods: Participants, interventions, and outcomes</b> |     |                                                                                                                                                                                                                                                                                                                                                                                |                      |
| 9  |                                                           |     |                                                                                                                                                                                                                                                                                                                                                                                |                      |
| 10 | Study setting                                             | 9   | Description of study settings (eg, community clinic, academic hospital) and list of countries where data will be collected. Reference to where list of study sites can be obtained                                                                                                                                                                                             | 6                    |
| 11 |                                                           |     |                                                                                                                                                                                                                                                                                                                                                                                |                      |
| 12 |                                                           |     |                                                                                                                                                                                                                                                                                                                                                                                |                      |
| 13 |                                                           |     |                                                                                                                                                                                                                                                                                                                                                                                |                      |
| 14 | Eligibility criteria                                      | 10  | Inclusion and exclusion criteria for participants. If applicable, eligibility criteria for study centres and individuals who will perform the interventions (eg, surgeons, psychotherapists)                                                                                                                                                                                   | 7-8+<br>Table 1      |
| 15 |                                                           |     |                                                                                                                                                                                                                                                                                                                                                                                |                      |
| 16 |                                                           |     |                                                                                                                                                                                                                                                                                                                                                                                |                      |
| 17 |                                                           |     |                                                                                                                                                                                                                                                                                                                                                                                |                      |
| 18 |                                                           |     |                                                                                                                                                                                                                                                                                                                                                                                |                      |
| 19 | Interventions                                             | 11a | Interventions for each group with sufficient detail to allow replication, including how and when they will be administered                                                                                                                                                                                                                                                     | 9-11 +<br>Table 2+3  |
| 20 |                                                           |     |                                                                                                                                                                                                                                                                                                                                                                                |                      |
| 21 |                                                           |     |                                                                                                                                                                                                                                                                                                                                                                                |                      |
| 22 |                                                           | 11b | Criteria for discontinuing or modifying allocated interventions for a given trial participant (eg, drug dose change in response to harms, participant request, or improving/worsening disease)                                                                                                                                                                                 | 8                    |
| 23 |                                                           |     |                                                                                                                                                                                                                                                                                                                                                                                |                      |
| 24 |                                                           |     |                                                                                                                                                                                                                                                                                                                                                                                |                      |
| 25 |                                                           |     |                                                                                                                                                                                                                                                                                                                                                                                |                      |
| 26 |                                                           | 11c | Strategies to improve adherence to intervention protocols, and any procedures for monitoring adherence (eg, drug tablet return, laboratory tests)                                                                                                                                                                                                                              | 12                   |
| 27 |                                                           |     |                                                                                                                                                                                                                                                                                                                                                                                |                      |
| 28 |                                                           |     |                                                                                                                                                                                                                                                                                                                                                                                |                      |
| 29 |                                                           |     |                                                                                                                                                                                                                                                                                                                                                                                |                      |
| 30 |                                                           |     |                                                                                                                                                                                                                                                                                                                                                                                |                      |
| 31 |                                                           | 11d | Relevant concomitant care and interventions that are permitted or prohibited during the trial                                                                                                                                                                                                                                                                                  | Table 1              |
| 32 |                                                           |     |                                                                                                                                                                                                                                                                                                                                                                                |                      |
| 33 |                                                           |     |                                                                                                                                                                                                                                                                                                                                                                                |                      |
| 34 | Outcomes                                                  | 12  | Primary, secondary, and other outcomes, including the specific measurement variable (eg, systolic blood pressure), analysis metric (eg, change from baseline, final value, time to event), method of aggregation (eg, median, proportion), and time point for each outcome. Explanation of the clinical relevance of chosen efficacy and harm outcomes is strongly recommended | 14-17                |
| 35 |                                                           |     |                                                                                                                                                                                                                                                                                                                                                                                |                      |
| 36 |                                                           |     |                                                                                                                                                                                                                                                                                                                                                                                |                      |
| 37 |                                                           |     |                                                                                                                                                                                                                                                                                                                                                                                |                      |
| 38 |                                                           |     |                                                                                                                                                                                                                                                                                                                                                                                |                      |
| 39 |                                                           |     |                                                                                                                                                                                                                                                                                                                                                                                |                      |
| 40 |                                                           |     |                                                                                                                                                                                                                                                                                                                                                                                |                      |
| 41 |                                                           |     |                                                                                                                                                                                                                                                                                                                                                                                |                      |
| 42 | Participant timeline                                      | 13  | Time schedule of enrolment, interventions (including any run-ins and washouts), assessments, and visits for participants. A schematic diagram is highly recommended (see Figure)                                                                                                                                                                                               | Figure 1<br>+Table 4 |
| 43 |                                                           |     |                                                                                                                                                                                                                                                                                                                                                                                |                      |
| 44 |                                                           |     |                                                                                                                                                                                                                                                                                                                                                                                |                      |
| 45 |                                                           |     |                                                                                                                                                                                                                                                                                                                                                                                |                      |
| 46 | Sample size                                               | 14  | Estimated number of participants needed to achieve study objectives and how it was determined, including clinical and statistical assumptions supporting any sample size calculations                                                                                                                                                                                          | 17                   |
| 47 |                                                           |     |                                                                                                                                                                                                                                                                                                                                                                                |                      |
| 48 |                                                           |     |                                                                                                                                                                                                                                                                                                                                                                                |                      |
| 49 |                                                           |     |                                                                                                                                                                                                                                                                                                                                                                                |                      |
| 50 |                                                           |     |                                                                                                                                                                                                                                                                                                                                                                                |                      |
| 51 | Recruitment                                               | 15  | Strategies for achieving adequate participant enrolment to reach target sample size                                                                                                                                                                                                                                                                                            | 7-8                  |
| 52 |                                                           |     |                                                                                                                                                                                                                                                                                                                                                                                |                      |
| 53 |                                                           |     |                                                                                                                                                                                                                                                                                                                                                                                |                      |

#### Methods: Assignment of interventions (for controlled trials)

##### Allocation:

|    |                                                           |     |                                                                          |       |
|----|-----------------------------------------------------------|-----|--------------------------------------------------------------------------|-------|
| 1  |                                                           |     |                                                                          |       |
| 2  | Sequence                                                  | 16a | Method of generating the allocation sequence (eg, computer-              |       |
| 3  | generation                                                |     | generated random numbers), and list of any factors for stratification.   |       |
| 4  |                                                           |     | To reduce predictability of a random sequence, details of any            |       |
| 5  |                                                           |     | planned restriction (eg, blocking) should be provided in a separate      | 9     |
| 6  |                                                           |     | document that is unavailable to those who enrol participants or          |       |
| 7  |                                                           |     | assign interventions                                                     |       |
| 8  |                                                           |     |                                                                          |       |
| 9  |                                                           |     |                                                                          |       |
| 10 | Allocation                                                | 16b | Mechanism of implementing the allocation sequence (eg, central           |       |
| 11 | concealment                                               |     | telephone; sequentially numbered, opaque, sealed envelopes),             |       |
| 12 | mechanism                                                 |     | describing any steps to conceal the sequence until interventions are     | 9     |
| 13 |                                                           |     | assigned                                                                 |       |
| 14 |                                                           |     |                                                                          |       |
| 15 | Implementation                                            | 16c | Who will generate the allocation sequence, who will enrol                |       |
| 16 |                                                           |     | participants, and who will assign participants to interventions          | 9     |
| 17 |                                                           |     |                                                                          |       |
| 18 |                                                           |     |                                                                          |       |
| 19 | Blinding                                                  | 17a | Who will be blinded after assignment to interventions (eg, trial         |       |
| 20 | (masking)                                                 |     | participants, care providers, outcome assessors, data analysts), and     | 11    |
| 21 |                                                           |     | how                                                                      |       |
| 22 |                                                           |     |                                                                          |       |
| 23 |                                                           | 17b | If blinded, circumstances under which unblinding is permissible, and     |       |
| 24 |                                                           |     | procedure for revealing a participant's allocated intervention during    | 9     |
| 25 |                                                           |     | the trial                                                                |       |
| 26 |                                                           |     |                                                                          |       |
| 27 |                                                           |     |                                                                          |       |
| 28 | <b>Methods: Data collection, management, and analysis</b> |     |                                                                          |       |
| 29 |                                                           |     |                                                                          |       |
| 30 | Data collection                                           | 18a | Plans for assessment and collection of outcome, baseline, and other      |       |
| 31 | methods                                                   |     | trial data, including any related processes to promote data quality      |       |
| 32 |                                                           |     | (eg, duplicate measurements, training of assessors) and a                | 12    |
| 33 |                                                           |     | description of study instruments (eg, questionnaires, laboratory         |       |
| 34 |                                                           |     | tests) along with their reliability and validity, if known. Reference to |       |
| 35 |                                                           |     | where data collection forms can be found, if not in the protocol         |       |
| 36 |                                                           |     |                                                                          |       |
| 37 |                                                           |     |                                                                          |       |
| 38 |                                                           | 18b | Plans to promote participant retention and complete follow-up,           |       |
| 39 |                                                           |     | including list of any outcome data to be collected for participants      | 17    |
| 40 |                                                           |     | who discontinue or deviate from intervention protocols                   |       |
| 41 |                                                           |     |                                                                          |       |
| 42 | Data                                                      | 19  | Plans for data entry, coding, security, and storage, including any       |       |
| 43 | management                                                |     | related processes to promote data quality (eg, double data entry;        |       |
| 44 |                                                           |     | range checks for data values). Reference to where details of data        | 20    |
| 45 |                                                           |     | management procedures can be found, if not in the protocol               |       |
| 46 |                                                           |     |                                                                          |       |
| 47 |                                                           |     |                                                                          |       |
| 48 | Statistical                                               | 20a | Statistical methods for analysing primary and secondary outcomes.        |       |
| 49 | methods                                                   |     | Reference to where other details of the statistical analysis plan can    | 17-18 |
| 50 |                                                           |     | be found, if not in the protocol                                         |       |
| 51 |                                                           |     |                                                                          |       |
| 52 |                                                           | 20b | Methods for any additional analyses (eg, subgroup and adjusted           |       |
| 53 |                                                           |     | analyses)                                                                | 17-18 |
| 54 |                                                           |     |                                                                          |       |
| 55 |                                                           | 20c | Definition of analysis population relating to protocol non-adherence     |       |
| 56 |                                                           |     | (eg, as randomised analysis), and any statistical methods to handle      | 18    |
| 57 |                                                           |     | missing data (eg, multiple imputation)                                   |       |
| 58 |                                                           |     |                                                                          |       |
| 59 |                                                           |     |                                                                          |       |
| 60 |                                                           |     |                                                                          |       |

1  
2 **Methods: Monitoring**

|    |                 |     |                                                                                                                                                                                                                                                                                                                                       |    |
|----|-----------------|-----|---------------------------------------------------------------------------------------------------------------------------------------------------------------------------------------------------------------------------------------------------------------------------------------------------------------------------------------|----|
| 3  |                 |     |                                                                                                                                                                                                                                                                                                                                       |    |
| 4  | Data monitoring | 21a | Composition of data monitoring committee (DMC); summary of its role and reporting structure; statement of whether it is independent from the sponsor and competing interests; and reference to where further details about its charter can be found, if not in the protocol. Alternatively, an explanation of why a DMC is not needed | 20 |
| 5  |                 |     |                                                                                                                                                                                                                                                                                                                                       |    |
| 6  |                 |     |                                                                                                                                                                                                                                                                                                                                       |    |
| 7  |                 |     |                                                                                                                                                                                                                                                                                                                                       |    |
| 8  |                 |     |                                                                                                                                                                                                                                                                                                                                       |    |
| 9  |                 |     |                                                                                                                                                                                                                                                                                                                                       |    |
| 10 |                 |     |                                                                                                                                                                                                                                                                                                                                       |    |
| 11 |                 | 21b | Description of any interim analyses and stopping guidelines, including who will have access to these interim results and make the final decision to terminate the trial                                                                                                                                                               | NR |
| 12 |                 |     |                                                                                                                                                                                                                                                                                                                                       |    |
| 13 |                 |     |                                                                                                                                                                                                                                                                                                                                       |    |
| 14 |                 |     |                                                                                                                                                                                                                                                                                                                                       |    |
| 15 | Harms           | 22  | Plans for collecting, assessing, reporting, and managing solicited and spontaneously reported adverse events and other unintended effects of trial interventions or trial conduct                                                                                                                                                     | 16 |
| 16 |                 |     |                                                                                                                                                                                                                                                                                                                                       |    |
| 17 |                 |     |                                                                                                                                                                                                                                                                                                                                       |    |
| 18 |                 |     |                                                                                                                                                                                                                                                                                                                                       |    |
| 19 |                 |     |                                                                                                                                                                                                                                                                                                                                       |    |
| 20 | Auditing        | 23  | Frequency and procedures for auditing trial conduct, if any, and whether the process will be independent from investigators and the sponsor                                                                                                                                                                                           | NR |
| 21 |                 |     |                                                                                                                                                                                                                                                                                                                                       |    |
| 22 |                 |     |                                                                                                                                                                                                                                                                                                                                       |    |
| 23 |                 |     |                                                                                                                                                                                                                                                                                                                                       |    |

24 **Ethics and dissemination**

|    |                               |     |                                                                                                                                                                                                                                  |       |
|----|-------------------------------|-----|----------------------------------------------------------------------------------------------------------------------------------------------------------------------------------------------------------------------------------|-------|
| 25 |                               |     |                                                                                                                                                                                                                                  |       |
| 26 | Research ethics approval      | 24  | Plans for seeking research ethics committee/institutional review board (REC/IRB) approval                                                                                                                                        | 3     |
| 27 |                               |     |                                                                                                                                                                                                                                  |       |
| 28 |                               |     |                                                                                                                                                                                                                                  |       |
| 29 | Protocol amendments           | 25  | Plans for communicating important protocol modifications (eg, changes to eligibility criteria, outcomes, analyses) to relevant parties (eg, investigators, REC/IRBs, trial participants, trial registries, journals, regulators) | 18    |
| 30 |                               |     |                                                                                                                                                                                                                                  |       |
| 31 |                               |     |                                                                                                                                                                                                                                  |       |
| 32 |                               |     |                                                                                                                                                                                                                                  |       |
| 33 |                               |     |                                                                                                                                                                                                                                  |       |
| 34 |                               |     |                                                                                                                                                                                                                                  |       |
| 35 | Consent or assent             | 26a | Who will obtain informed consent or assent from potential trial participants or authorised surrogates, and how (see Item 32)                                                                                                     | 7     |
| 36 |                               |     |                                                                                                                                                                                                                                  |       |
| 37 |                               |     |                                                                                                                                                                                                                                  |       |
| 38 |                               |     |                                                                                                                                                                                                                                  |       |
| 39 |                               | 26b | Additional consent provisions for collection and use of participant data and biological specimens in ancillary studies, if applicable                                                                                            | NR    |
| 40 |                               |     |                                                                                                                                                                                                                                  |       |
| 41 |                               |     |                                                                                                                                                                                                                                  |       |
| 42 | Confidentiality               | 27  | How personal information about potential and enrolled participants will be collected, shared, and maintained in order to protect confidentiality before, during, and after the trial                                             | 19-20 |
| 43 |                               |     |                                                                                                                                                                                                                                  |       |
| 44 |                               |     |                                                                                                                                                                                                                                  |       |
| 45 |                               |     |                                                                                                                                                                                                                                  |       |
| 46 | Declaration of interests      | 28  | Financial and other competing interests for principal investigators for the overall trial and each study site                                                                                                                    | 23    |
| 47 |                               |     |                                                                                                                                                                                                                                  |       |
| 48 |                               |     |                                                                                                                                                                                                                                  |       |
| 49 | Access to data                | 29  | Statement of who will have access to the final trial dataset, and disclosure of contractual agreements that limit such access for investigators                                                                                  | 20    |
| 50 |                               |     |                                                                                                                                                                                                                                  |       |
| 51 |                               |     |                                                                                                                                                                                                                                  |       |
| 52 |                               |     |                                                                                                                                                                                                                                  |       |
| 53 |                               |     |                                                                                                                                                                                                                                  |       |
| 54 | Ancillary and post-trial care | 30  | Provisions, if any, for ancillary and post-trial care, and for compensation to those who suffer harm from trial participation                                                                                                    | 18-19 |
| 55 |                               |     |                                                                                                                                                                                                                                  |       |
| 56 |                               |     |                                                                                                                                                                                                                                  |       |
| 57 |                               |     |                                                                                                                                                                                                                                  |       |
| 58 |                               |     |                                                                                                                                                                                                                                  |       |
| 59 |                               |     |                                                                                                                                                                                                                                  |       |
| 60 |                               |     |                                                                                                                                                                                                                                  |       |

|    |                               |     |                                                                                                                                                                                                                                                                                     |                                                         |
|----|-------------------------------|-----|-------------------------------------------------------------------------------------------------------------------------------------------------------------------------------------------------------------------------------------------------------------------------------------|---------------------------------------------------------|
| 1  |                               |     |                                                                                                                                                                                                                                                                                     |                                                         |
| 2  | Dissemination<br>policy       | 31a | Plans for investigators and sponsor to communicate trial results to participants, healthcare professionals, the public, and other relevant groups (eg, via publication, reporting in results databases, or other data sharing arrangements), including any publication restrictions | 4+20                                                    |
| 3  |                               |     |                                                                                                                                                                                                                                                                                     |                                                         |
| 4  |                               |     |                                                                                                                                                                                                                                                                                     |                                                         |
| 5  |                               |     |                                                                                                                                                                                                                                                                                     |                                                         |
| 6  |                               |     |                                                                                                                                                                                                                                                                                     |                                                         |
| 7  |                               | 31b | Authorship eligibility guidelines and any intended use of professional writers                                                                                                                                                                                                      | NR                                                      |
| 8  |                               |     |                                                                                                                                                                                                                                                                                     |                                                         |
| 9  |                               |     |                                                                                                                                                                                                                                                                                     |                                                         |
| 10 |                               | 31c | Plans, if any, for granting public access to the full protocol, participant-level dataset, and statistical code                                                                                                                                                                     | 20                                                      |
| 11 |                               |     |                                                                                                                                                                                                                                                                                     |                                                         |
| 12 |                               |     |                                                                                                                                                                                                                                                                                     |                                                         |
| 13 |                               |     |                                                                                                                                                                                                                                                                                     |                                                         |
| 14 | <b>Appendices</b>             |     |                                                                                                                                                                                                                                                                                     |                                                         |
| 15 |                               |     |                                                                                                                                                                                                                                                                                     |                                                         |
| 16 | Informed consent<br>materials | 32  | Model consent form and other related documentation given to participants and authorised surrogates                                                                                                                                                                                  | The master<br>version can<br>be delivered<br>by request |
| 17 |                               |     |                                                                                                                                                                                                                                                                                     |                                                         |
| 18 |                               |     |                                                                                                                                                                                                                                                                                     |                                                         |
| 19 |                               |     |                                                                                                                                                                                                                                                                                     |                                                         |
| 20 |                               |     |                                                                                                                                                                                                                                                                                     |                                                         |
| 21 |                               |     |                                                                                                                                                                                                                                                                                     |                                                         |
| 22 | Biological<br>specimens       | 33  | Plans for collection, laboratory evaluation, and storage of biological specimens for genetic or molecular analysis in the current trial and for future use in ancillary studies, if applicable                                                                                      | NR                                                      |
| 23 |                               |     |                                                                                                                                                                                                                                                                                     |                                                         |
| 24 |                               |     |                                                                                                                                                                                                                                                                                     |                                                         |
| 25 |                               |     |                                                                                                                                                                                                                                                                                     |                                                         |

---

\*It is strongly recommended that this checklist be read in conjunction with the SPIRIT 2013 Explanation & Elaboration for important clarification on the items. Amendments to the protocol should be tracked and dated. The SPIRIT checklist is copyrighted by the SPIRIT Group under the Creative Commons "[Attribution-NonCommercial-NoDerivs 3.0 Unported](https://creativecommons.org/licenses/by-nc-nd/3.0/)" license.
